# Supplementary material for: Organocatalytic diastereo- and enantioselective conjugate addition of pyrazol-3-ones to 3-trifluoroethylidene oxindoles with a newly developed squaramide catalyst
Source: Royal Society of Chemistry journal article supplement (doi:10.1039/d2ra05088a), 2022-01-01
Supplement: d2ra05088a1.pdf [file d2ra05088a1.pdf]

## Supporting Information

# Organocatalytic Diastereo- and Enantioselective Conjugate Addition of Pyrazol-3-ones to 3-Trifluoroethylidene Oxindoles with A Newly Developed Squaramide Catalyst

Zhao Han, Jiaping Jin, Alemayehu Gashaw Woldegiorgis and Xufeng Lin\*  
Department of Chemistry, Zhejiang University, Hangzhou 310027, P. R of China; E-mail:  
lxfok@zju.edu.cn

### Table of contents

|                                         |    |
|-----------------------------------------|----|
| 1 Copies of NMR spectra . . . . .       | 2  |
| 2 Copies of HRMS Spectra . . . . .      | 35 |
| 3 Copies of HPLC spectra . . . . .      | 46 |
| 4 X-ray data for compound 13e . . . . . | 62 |

# 1 Copies of NMR spectra

*(R)*-3,3,3',3',5,5'-hexamethyl-2,2',3,3'-tetrahydro-1,1'-spirobi[indene]-6,6'-diol [*(R)*-1]

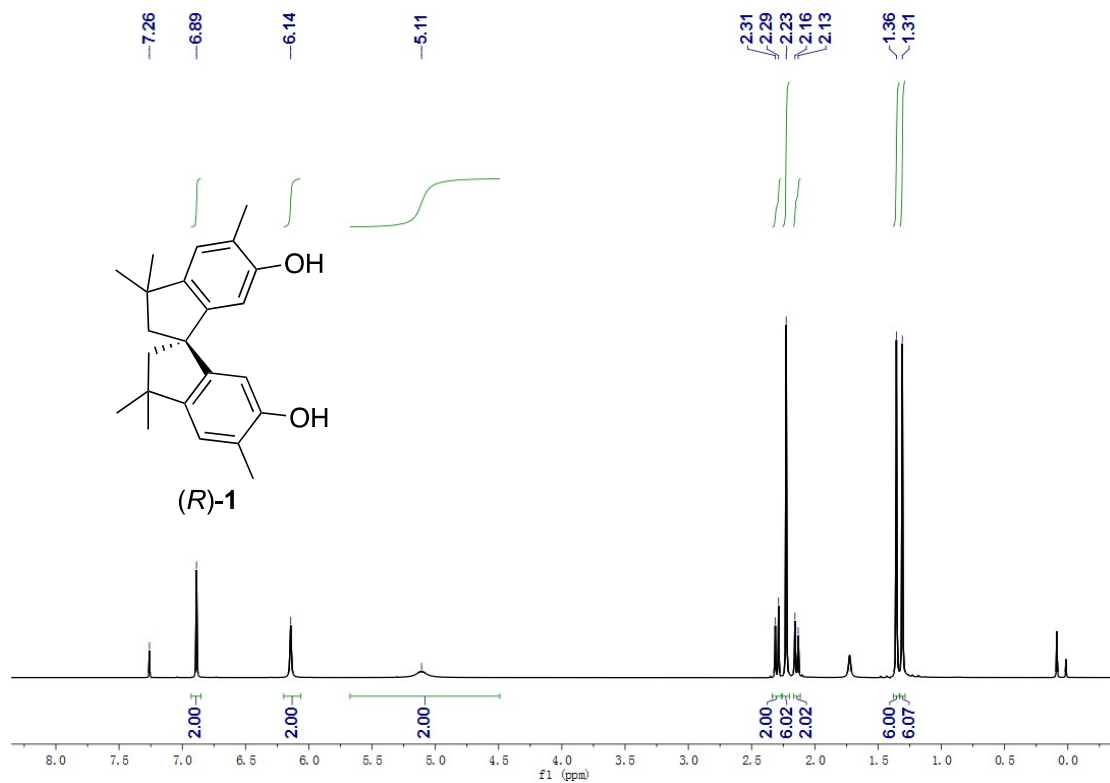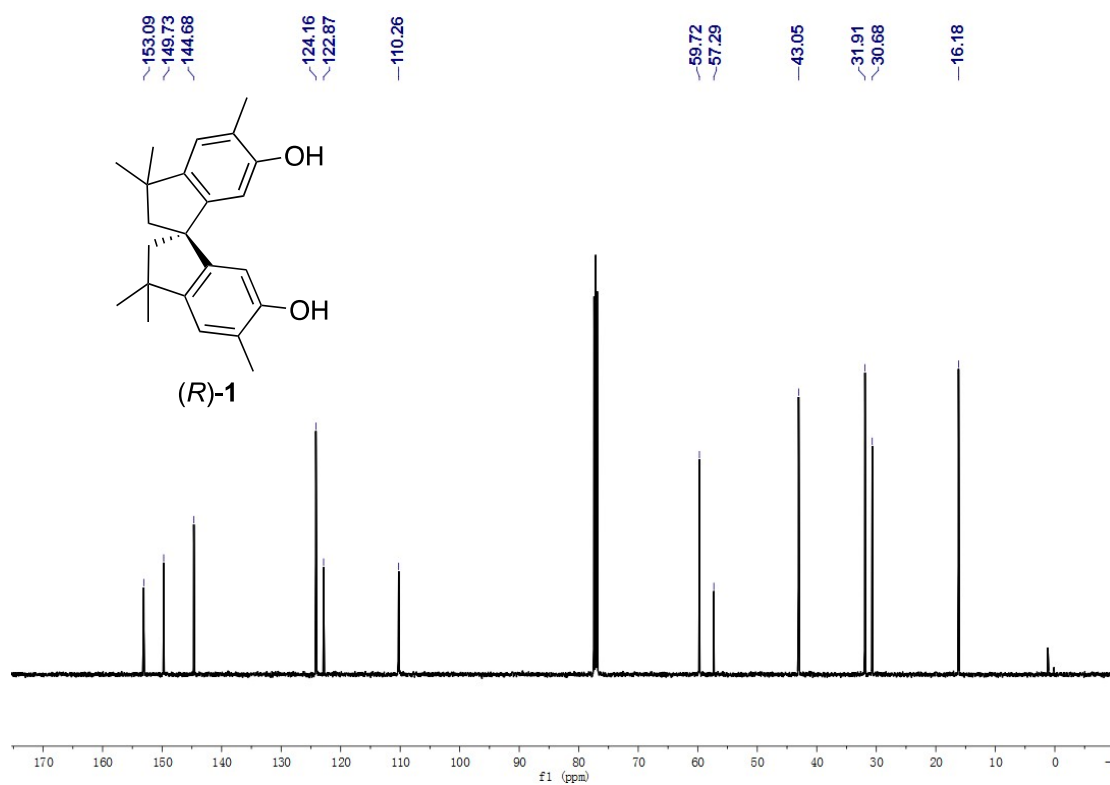

**(R)-6,6'-dihydroxy-3,3,3',3',5,5'-hexamethyl-2,2',3,3'-tetrahydro-1,1'-spirobi[indene]-7,7'-dicarbaldehyde [(R)-2]**

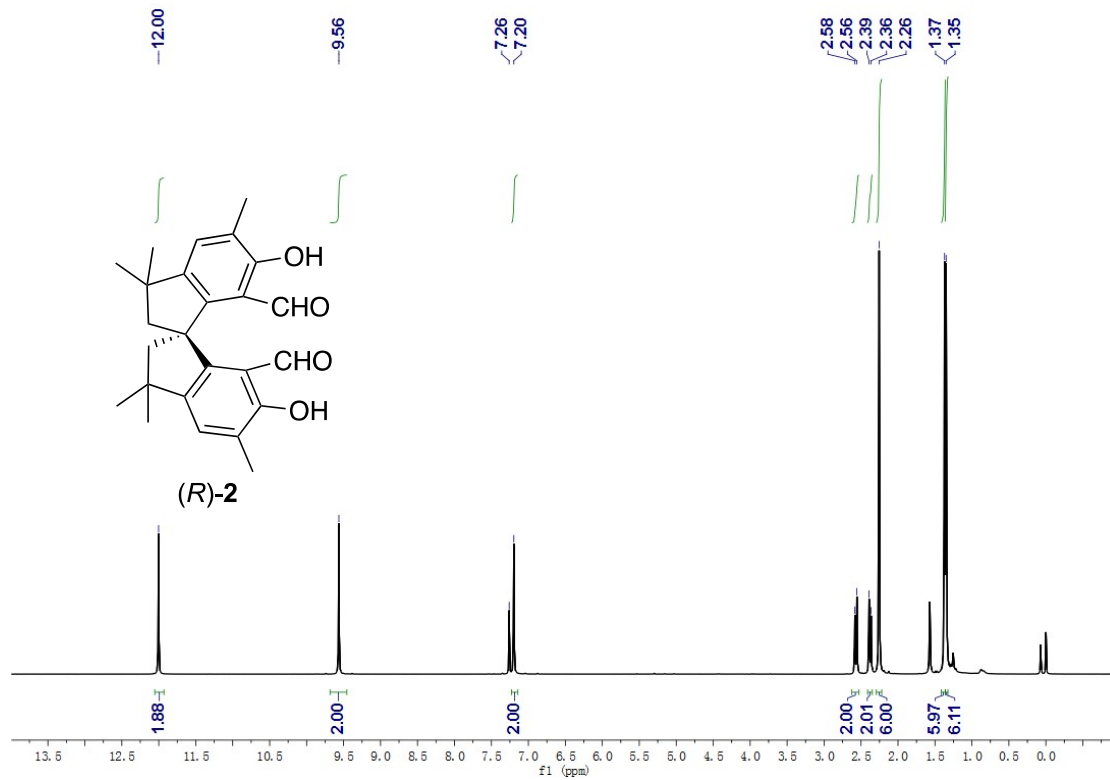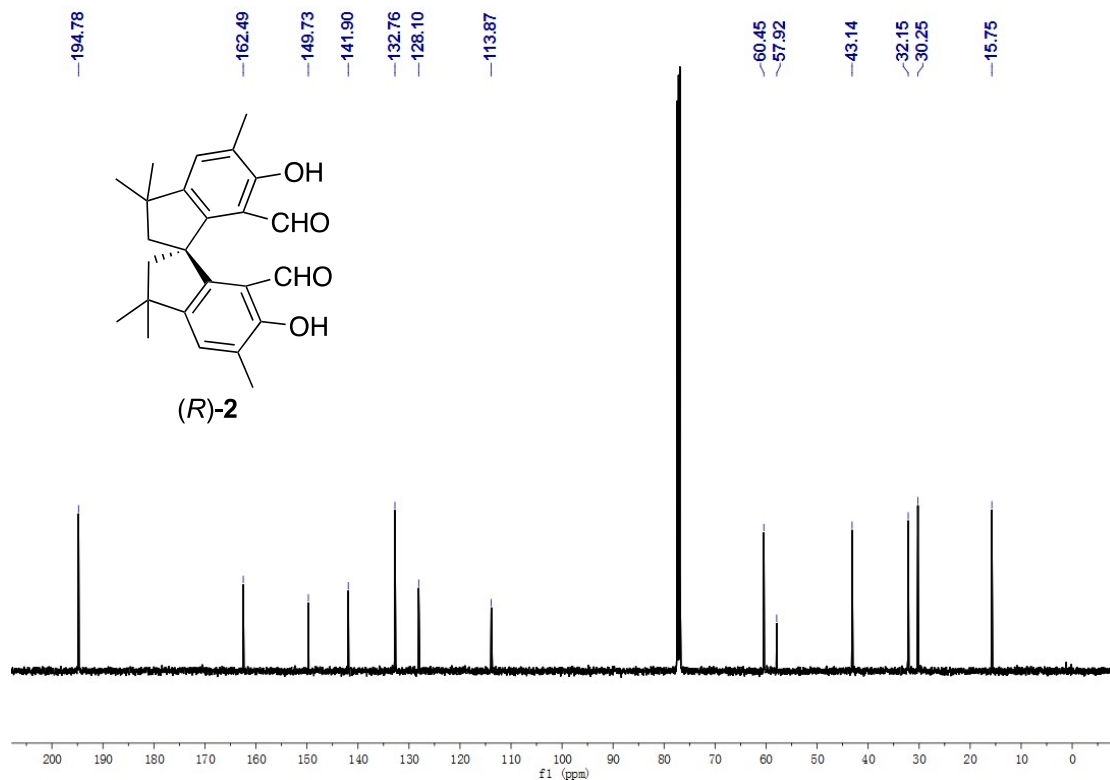

**(R)-7,7'-diformyl-3,3,3',3',5,5'-hexamethyl-2,2',3,3'-tetrahydro-1,1'-spirobi[indene]-6,6'-diyl bis(trifluoromethanesulfonate) [(R)-3]**

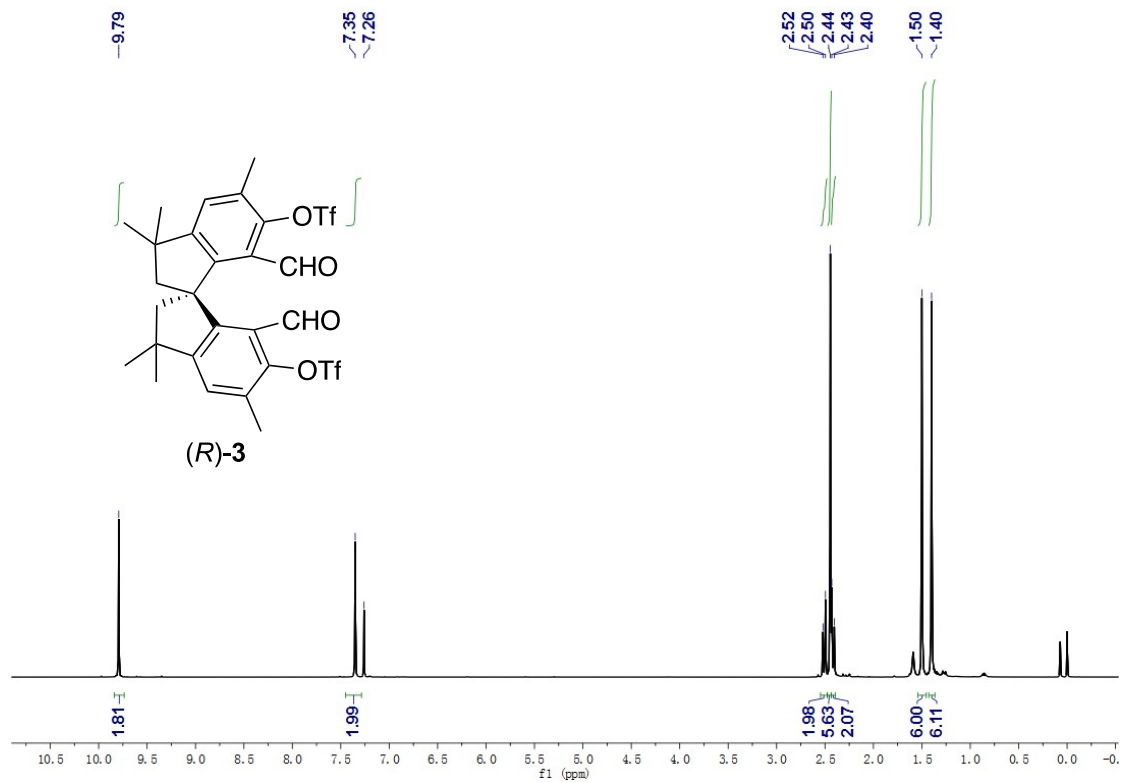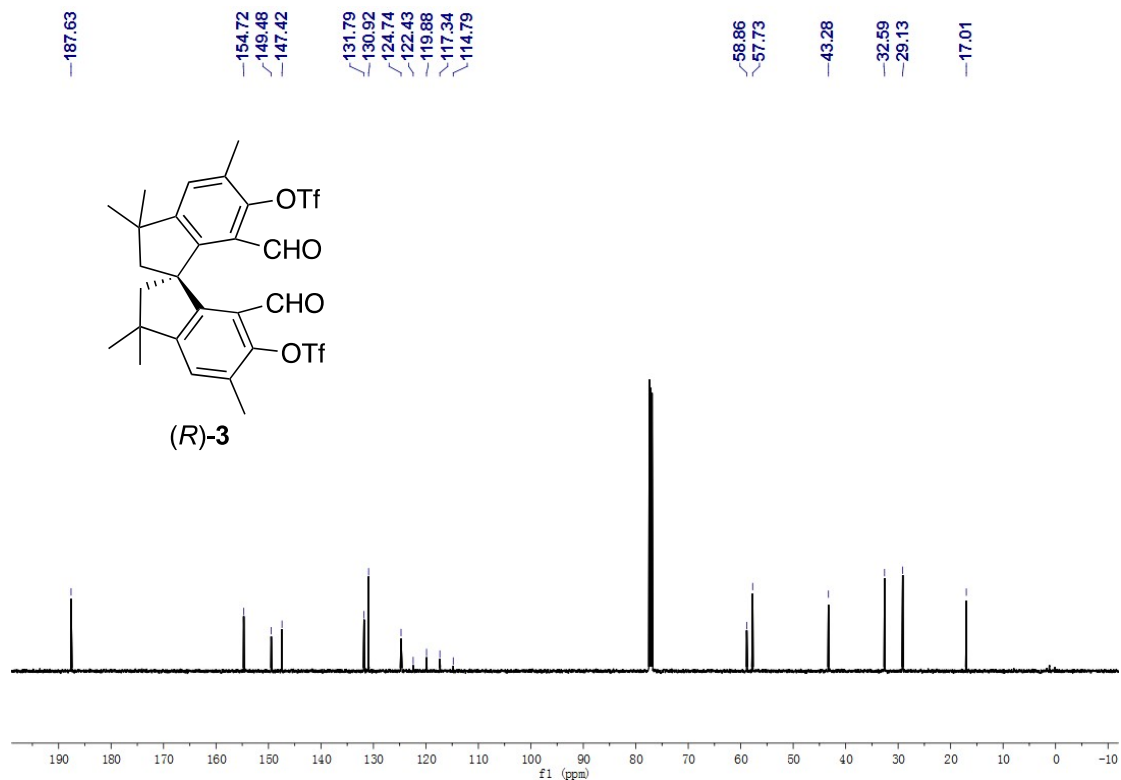

**(R)-3,3,3',3',5,5'-hexamethyl-2,2',3,3'-tetrahydro-1,1'-spirobi[indene]-7,7'-dicarbaldehyde**  
**[(R)-4]**

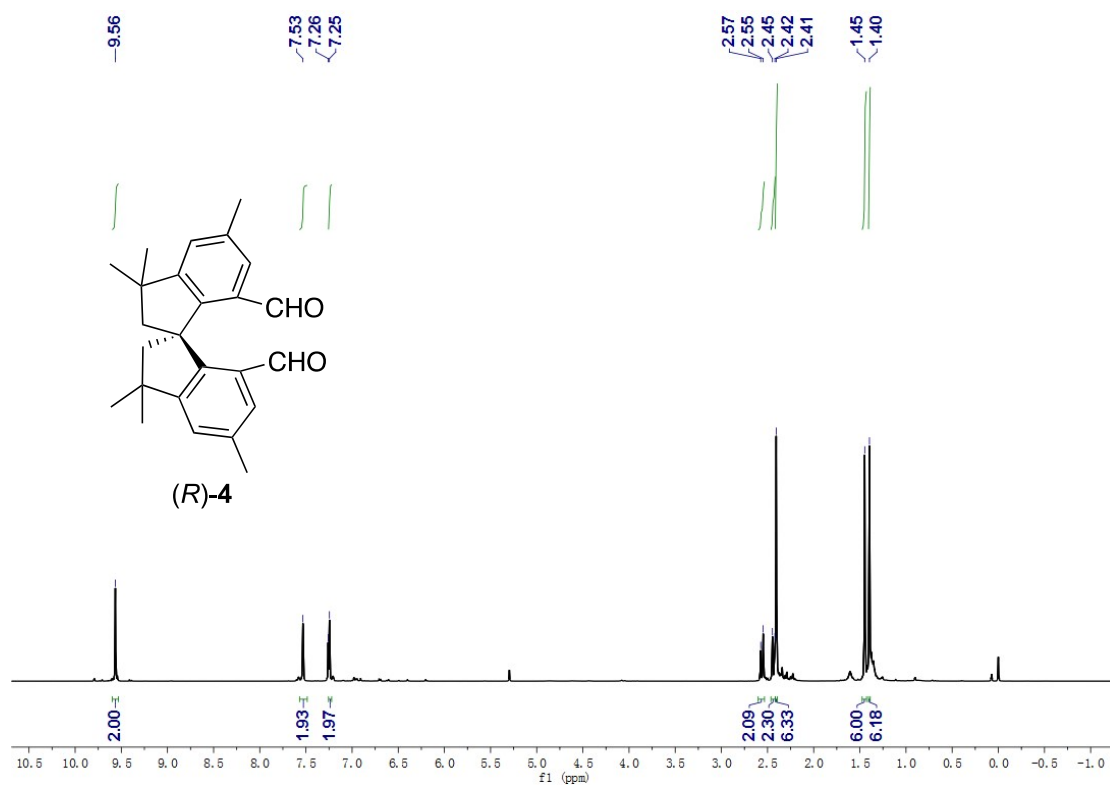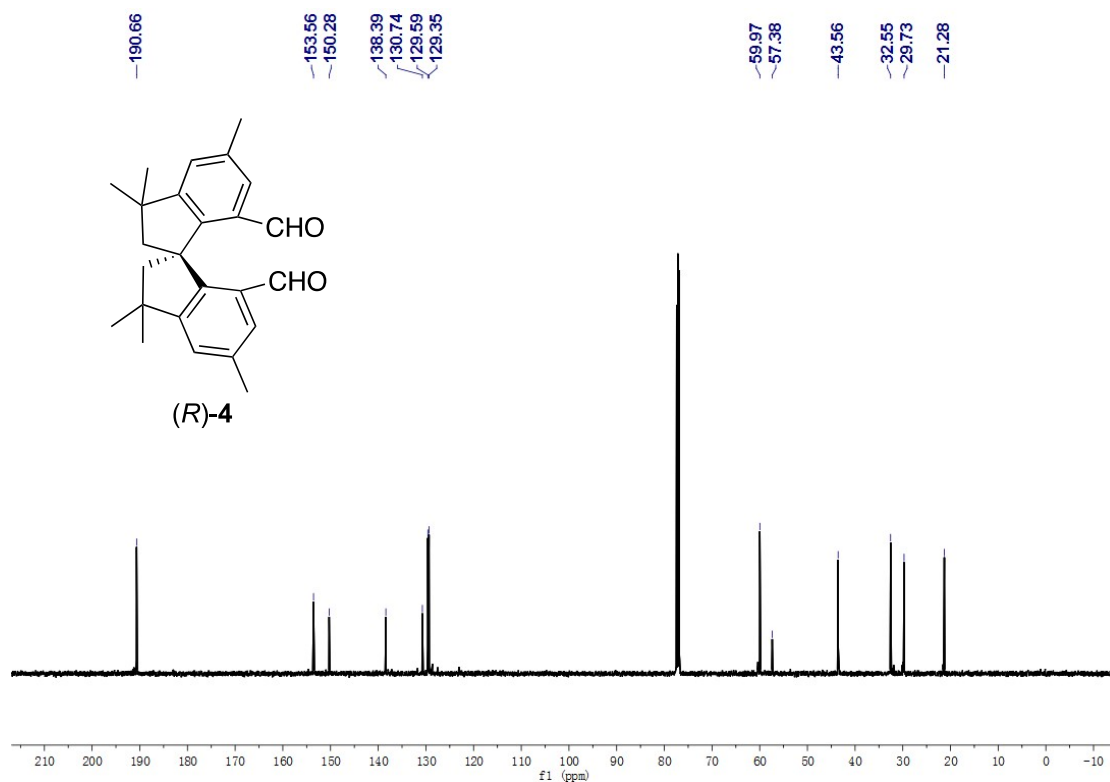

**(R)-(3,3,3',3',5,5'-hexamethyl-2,2',3,3'-tetrahydro-1,1'-spiro[indene]-7,7'-diyl)dimethanol**  
**[(R)-5]**

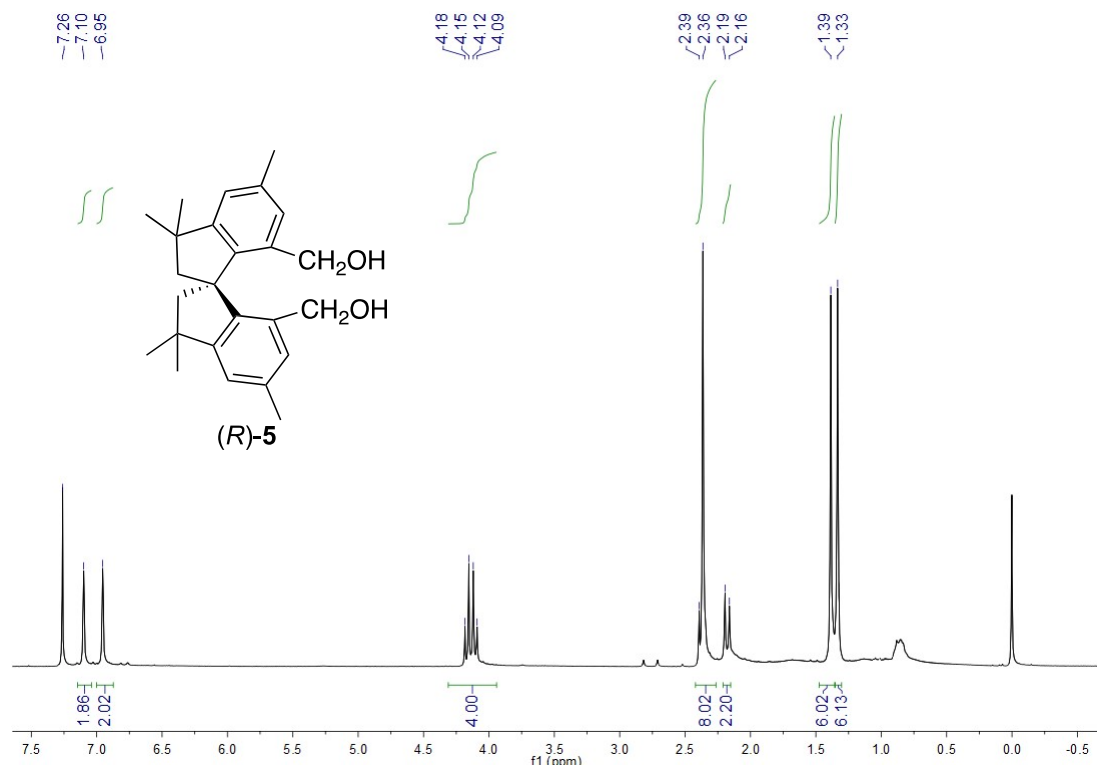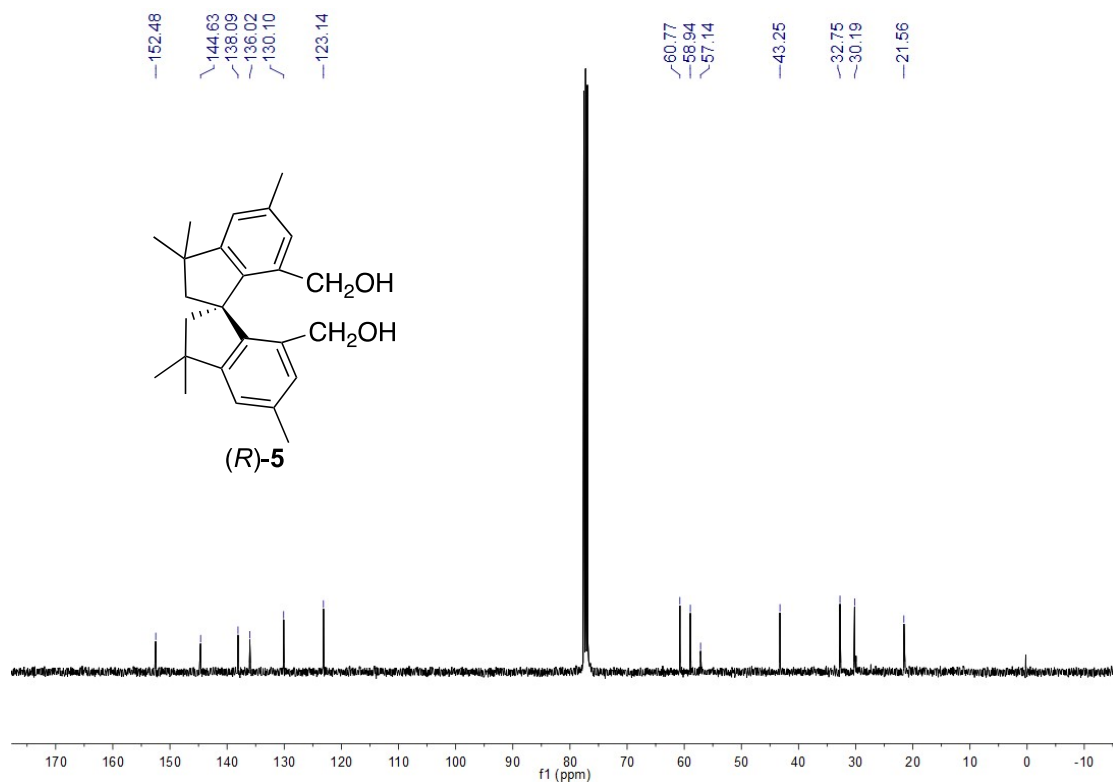

**(R)-7,7'-bis(bromomethyl)-3,3,3',3',5-pentamethyl-2,2',3,3'-tetrahydro-1,1'-spirobi[indene]**  
**[(R)-6]**

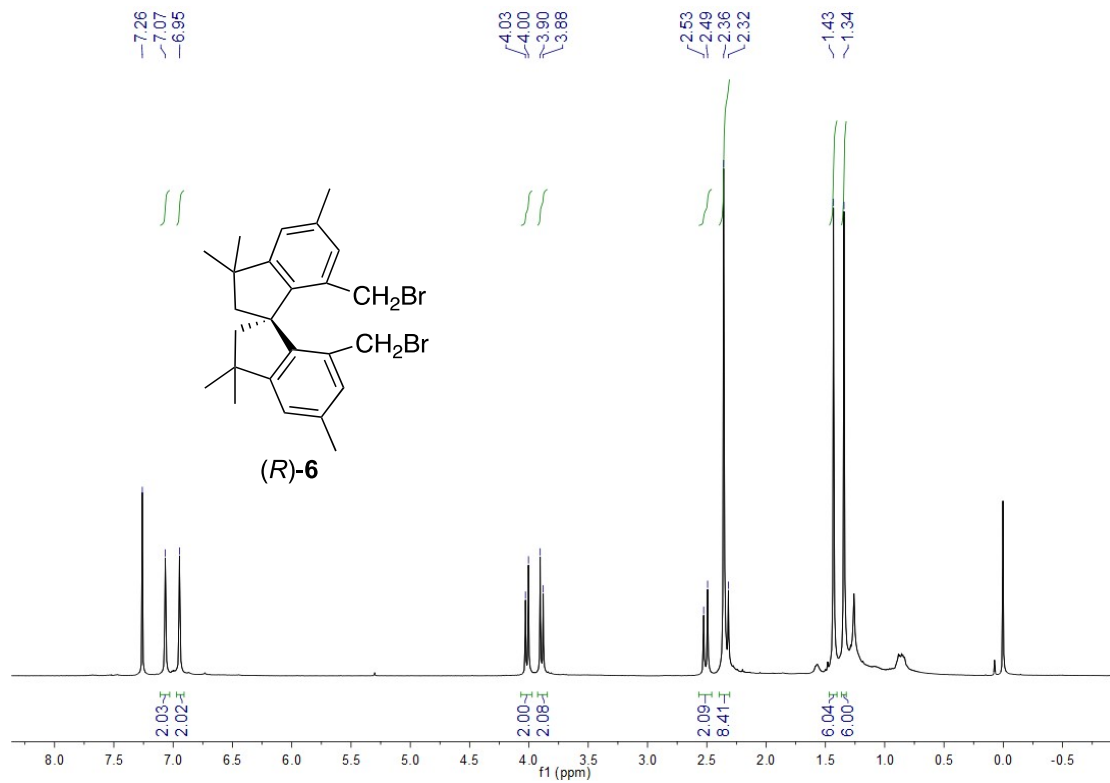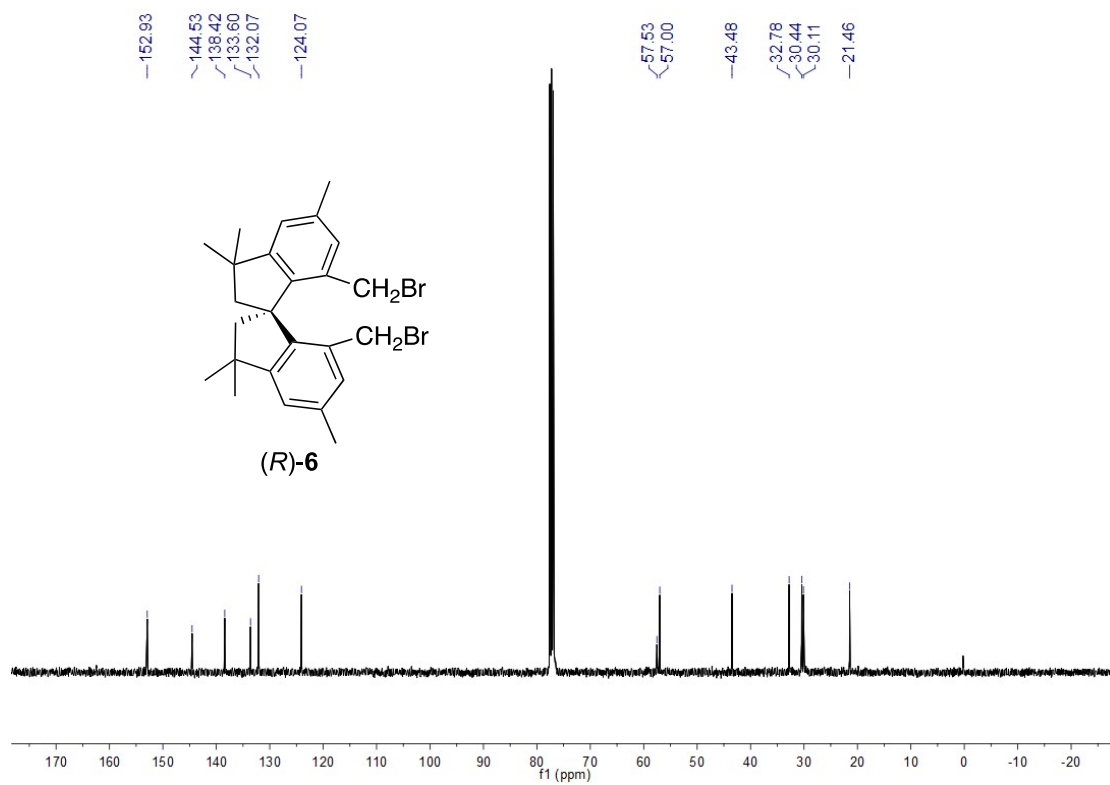

**(1R,2R)-2-(2,4,4,7,7,9-hexamethyl-4,5,6,7-tetrahydro-11H-diindeno[7,1-cd:1',7'-ef]azocin-12(13H)-yl)cyclohexan-1-amine (7)**

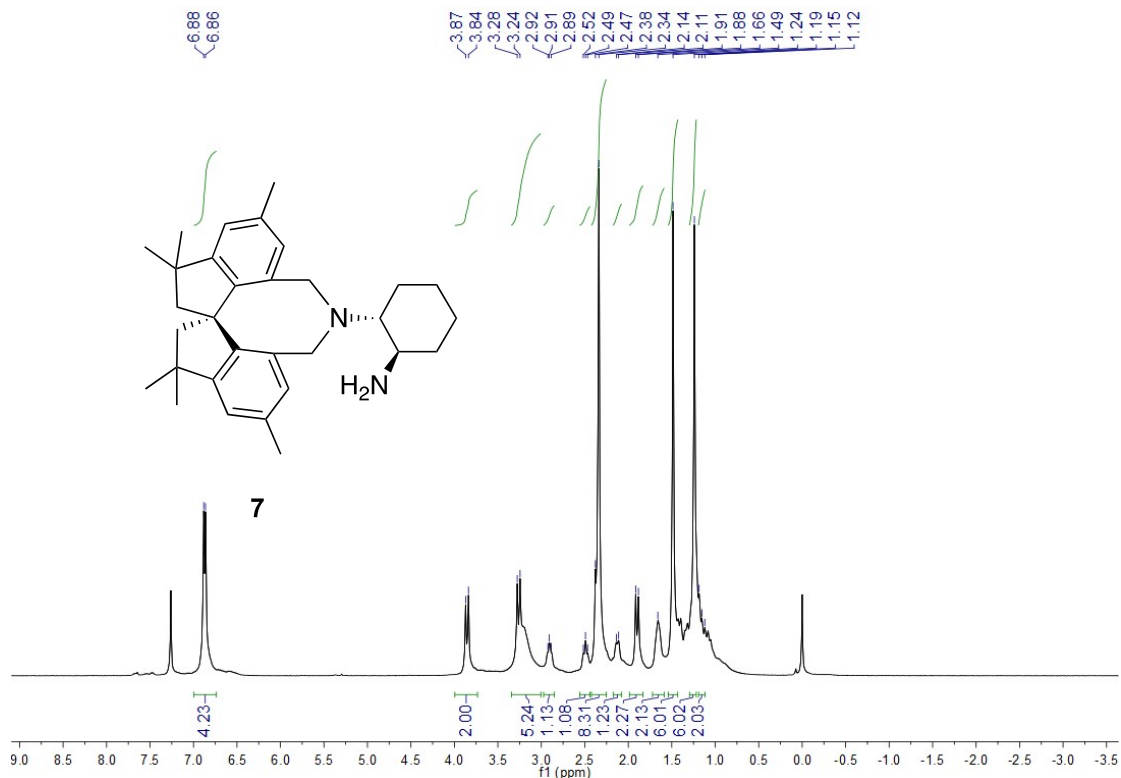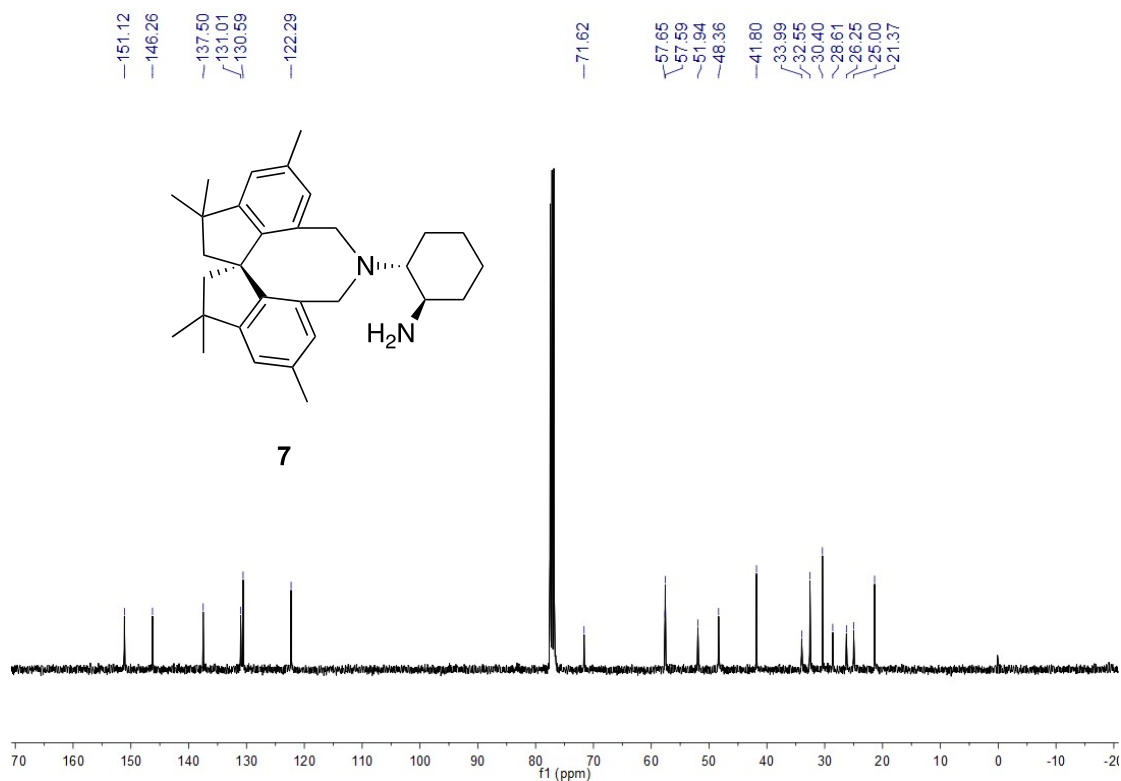



**3-((3,5-bis(trifluoromethyl)phenyl)amino)-4-(((1R,2R)-2-(2,4,4,7,7,9-hexamethyl-4,5,6,7-tetrahydro-11H-diindeno[7,1-cd:1',7'-ef]azocin-12(13H)-yl)cyclohexyl)amino)cyclobut-3-ene-1,2-dione (9a)**

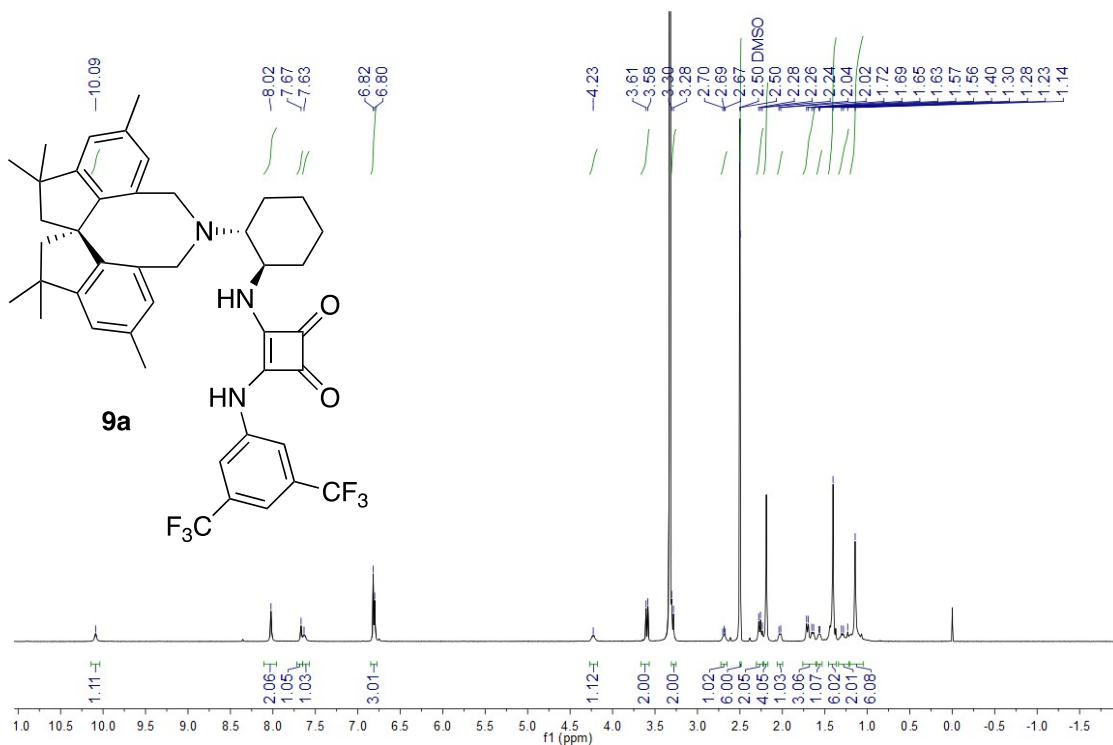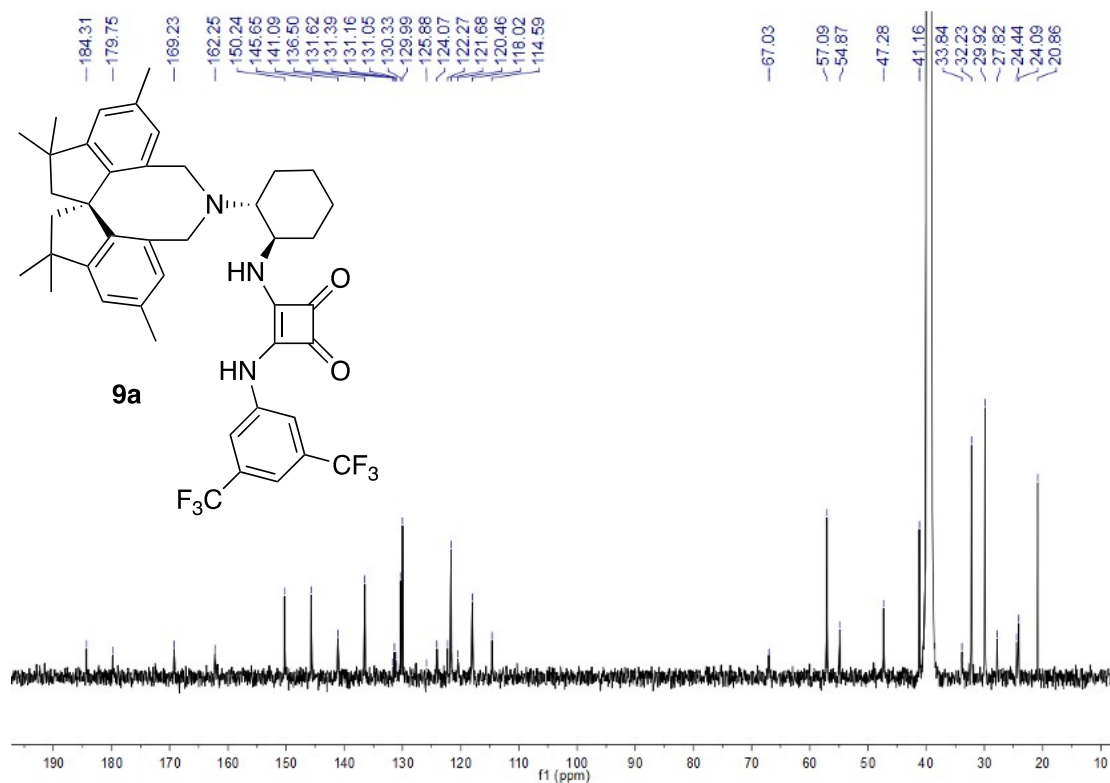

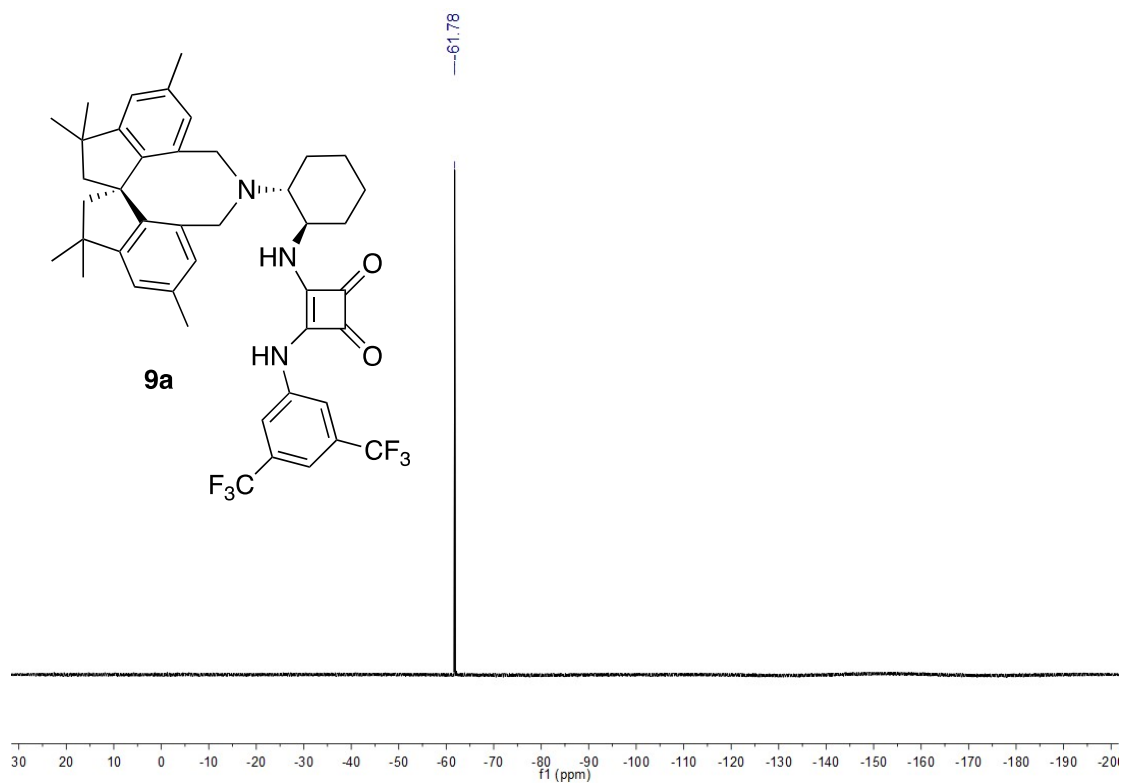

**Tert-butyl 2-oxo-3-(2,2,2-trifluoro-1-(5-hydroxy-1,3-diphenyl-1H-pyrazol-4-yl)ethyl)indoline-1-carboxylate (12a)**

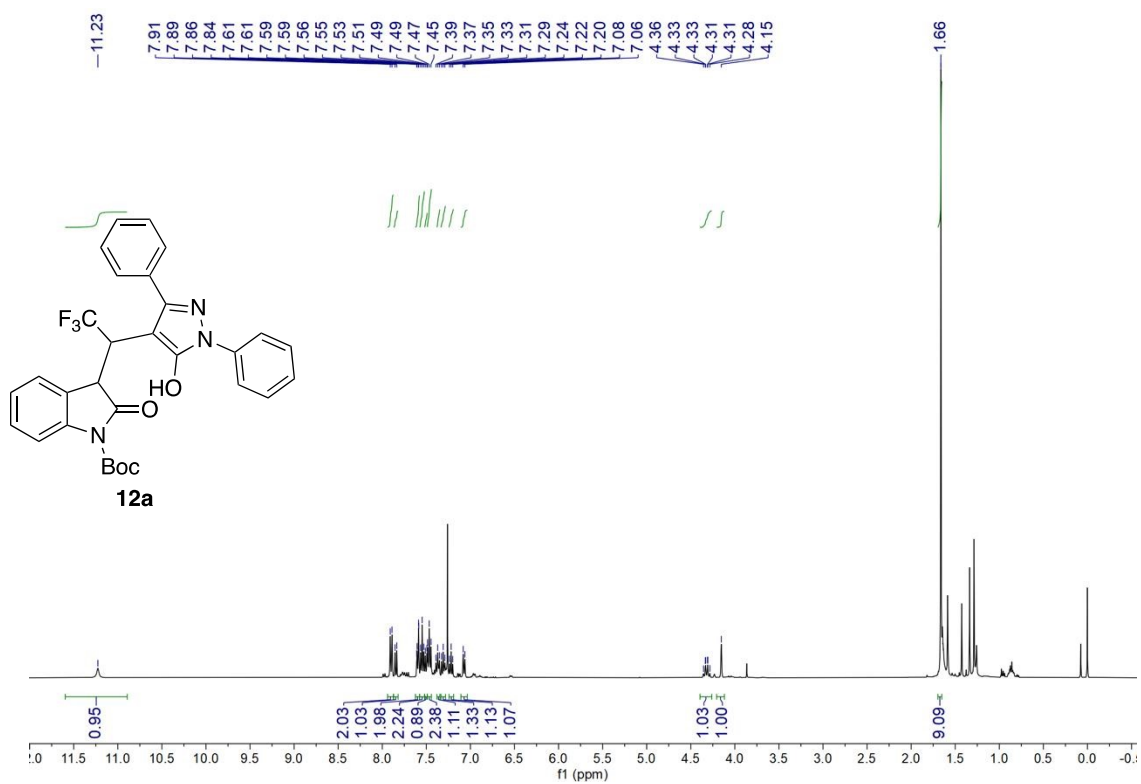

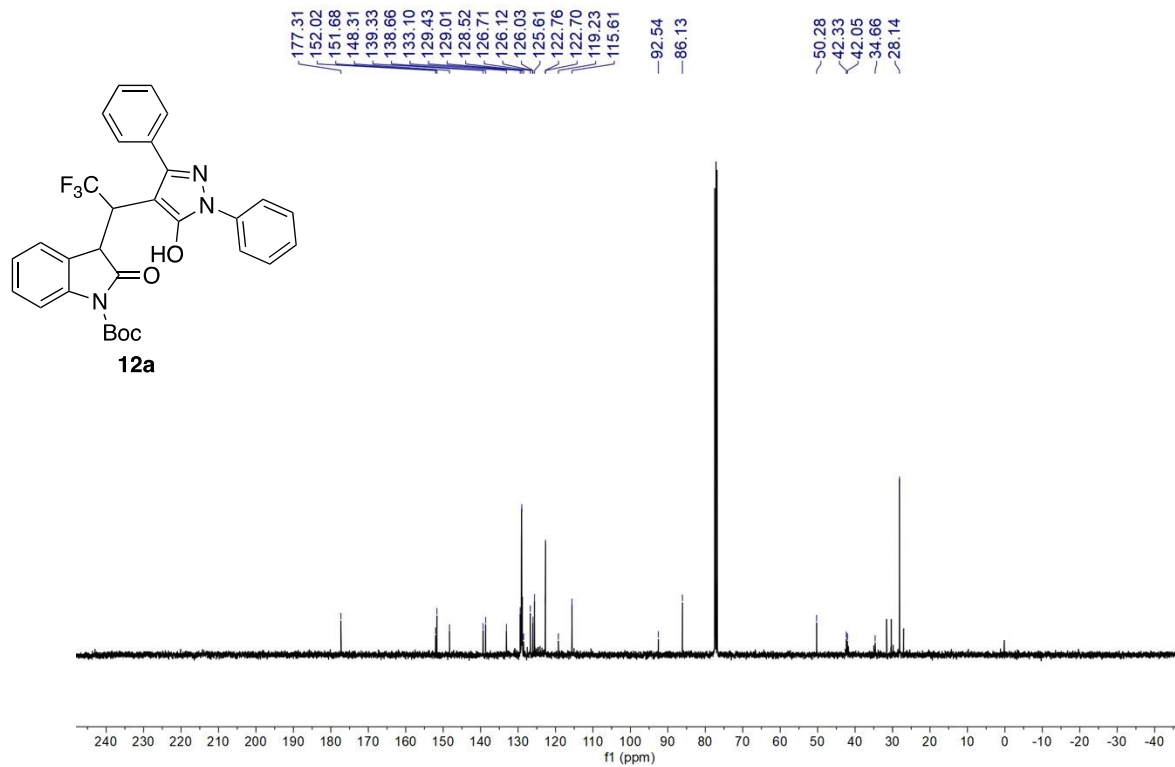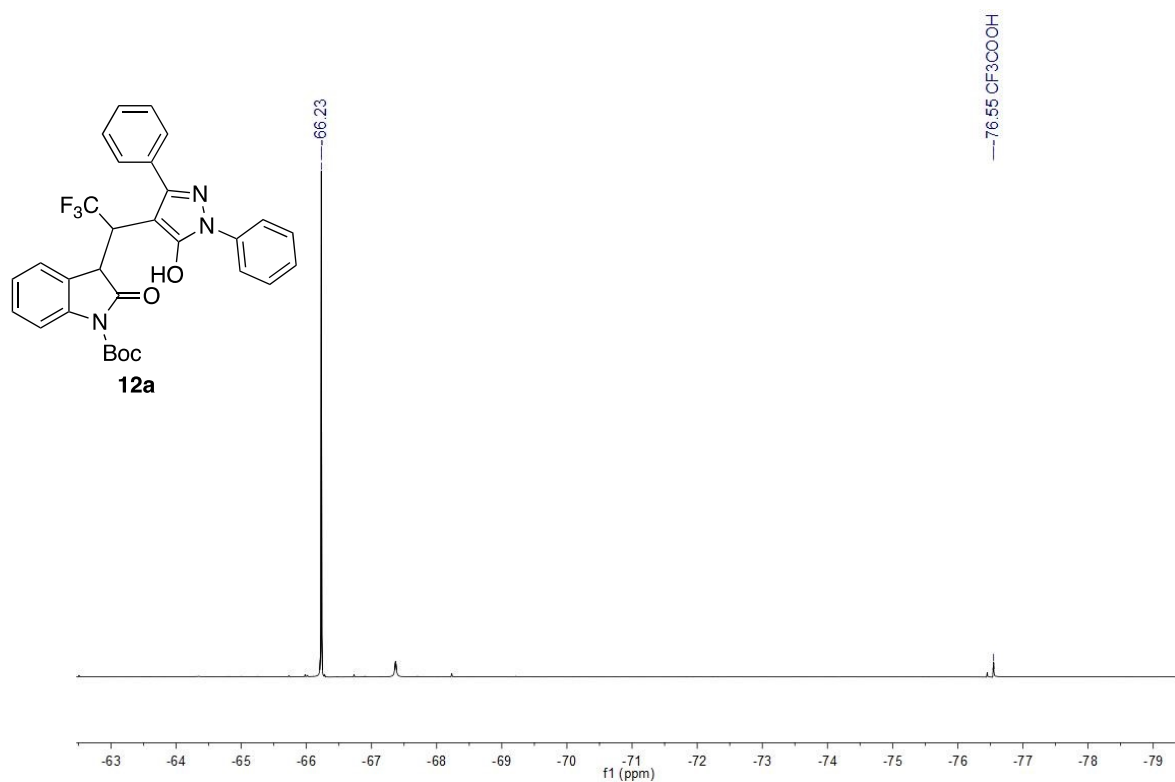

**(R)-3-((R)-2,2,2-trifluoro-1-(5-hydroxy-1,3-diphenyl-1H-pyrazol-4-yl)ethyl)indolin-2-one (13a).**

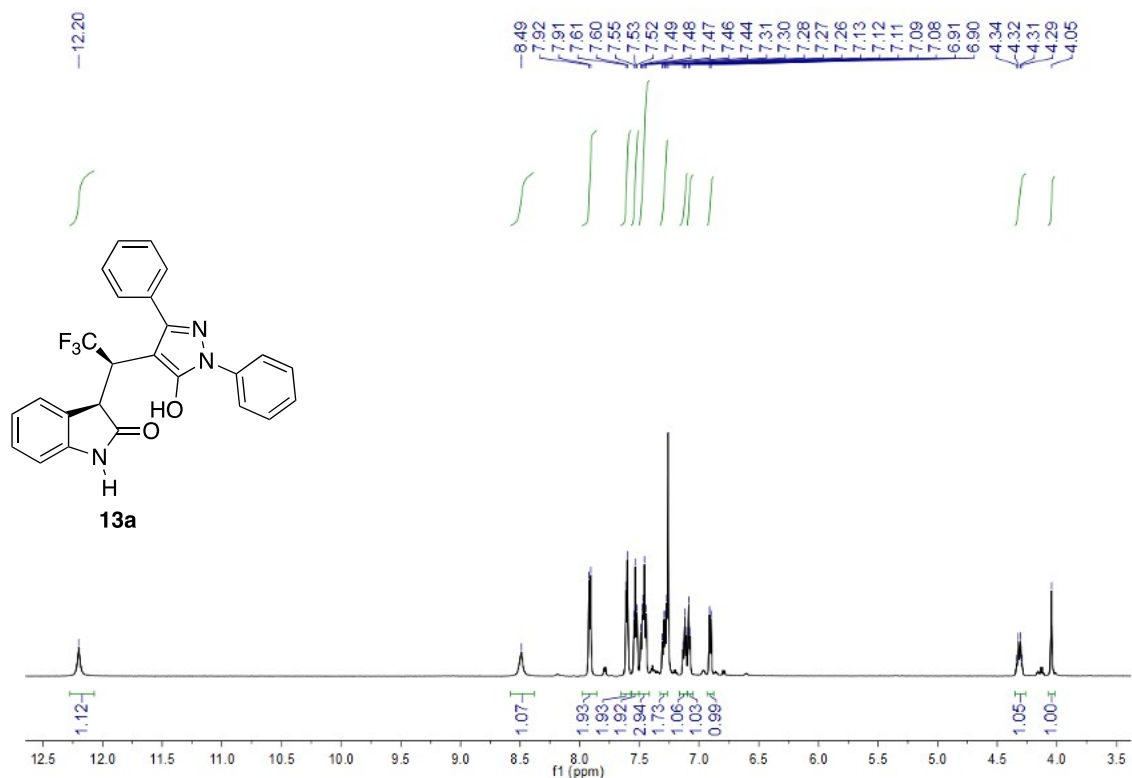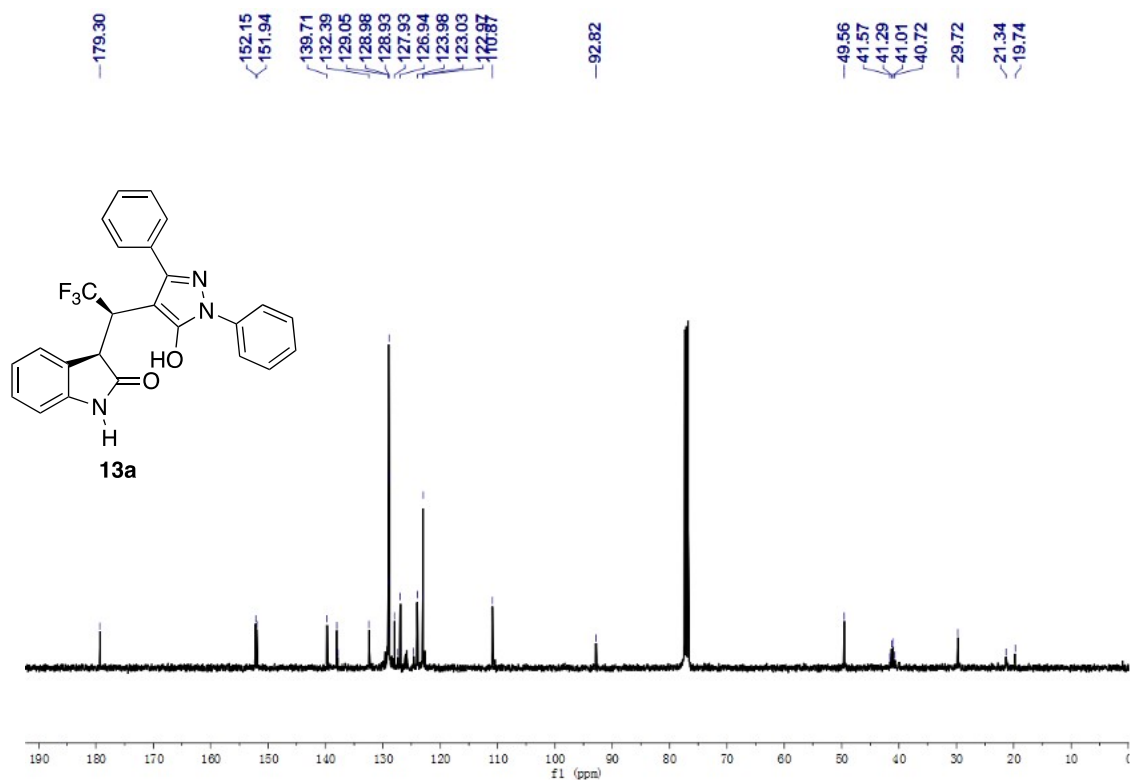

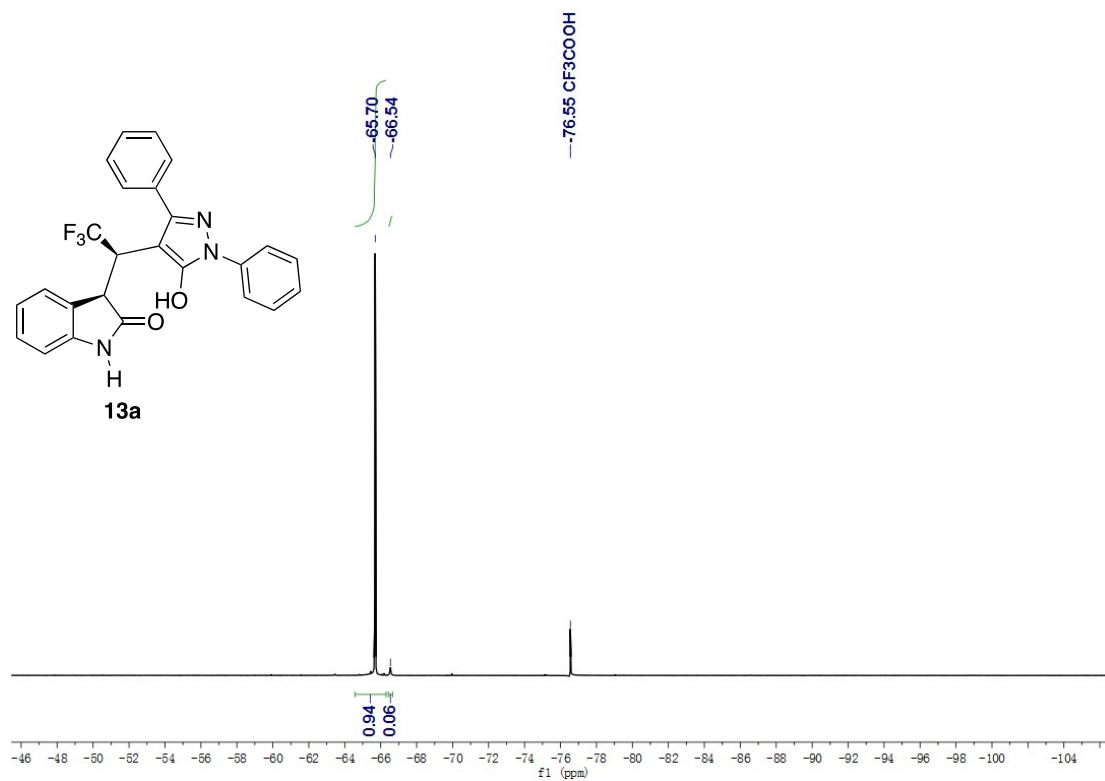

**(R)-3-((R)-1-(3-(2-chlorophenyl)-5-hydroxy-1-phenyl-1H-pyrazol-4-yl)-2,2,2-trifluoroethyl)indolin-2-one (13b)**

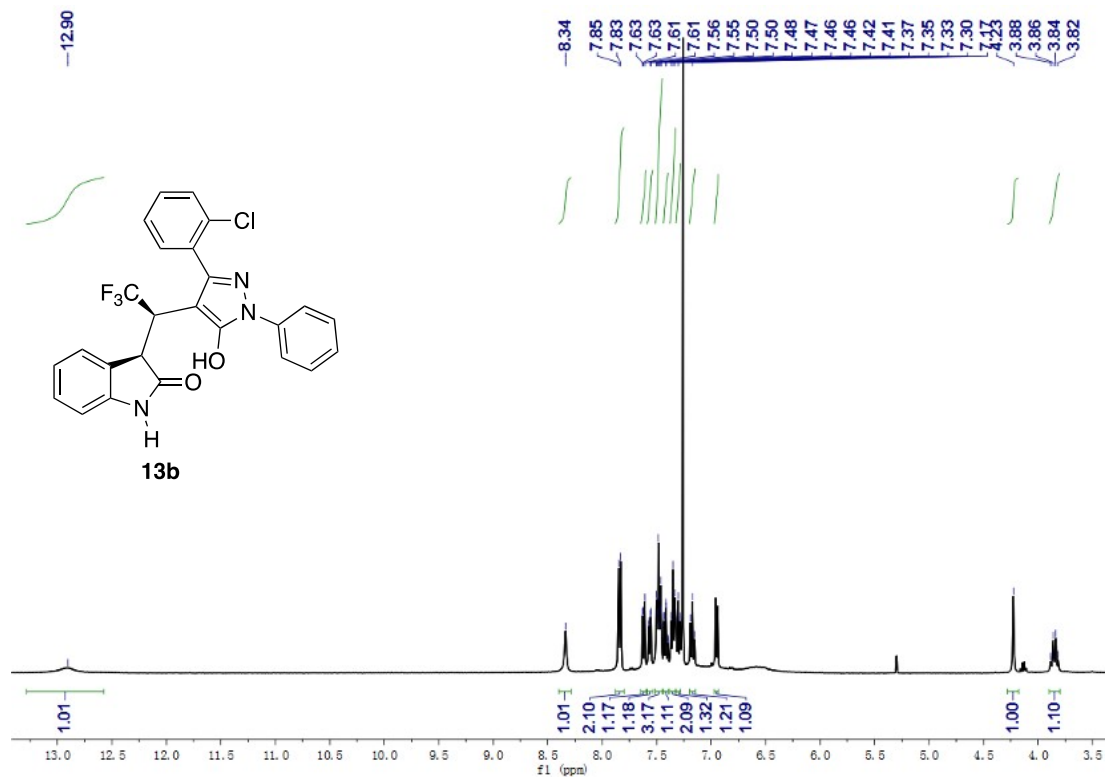

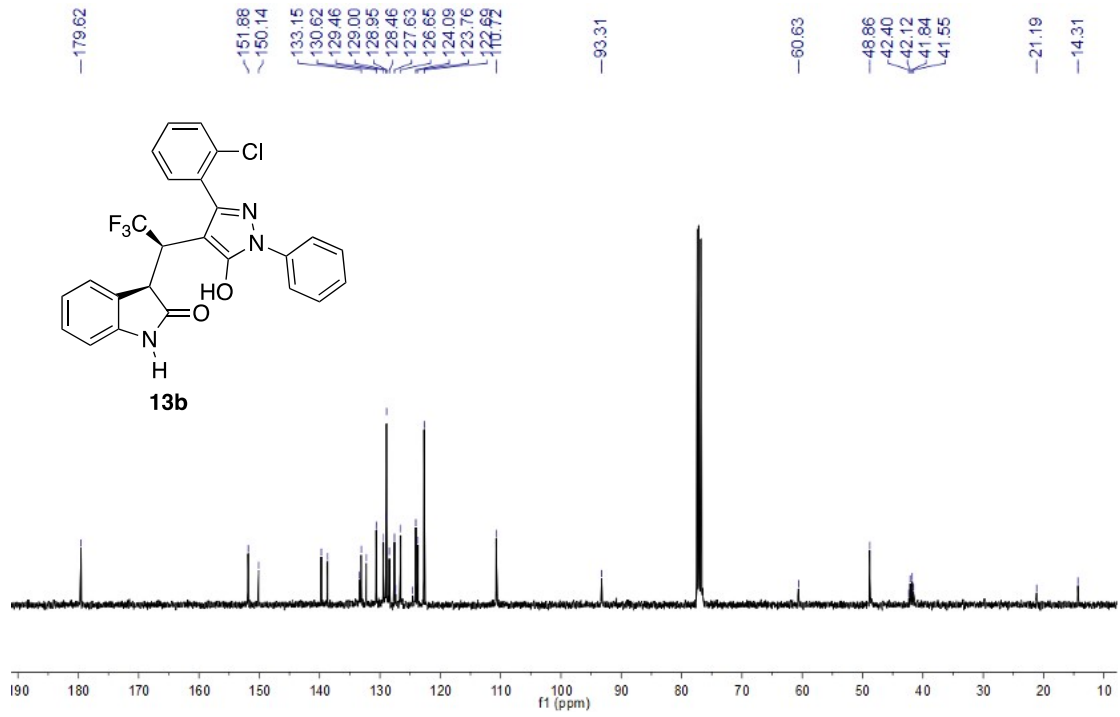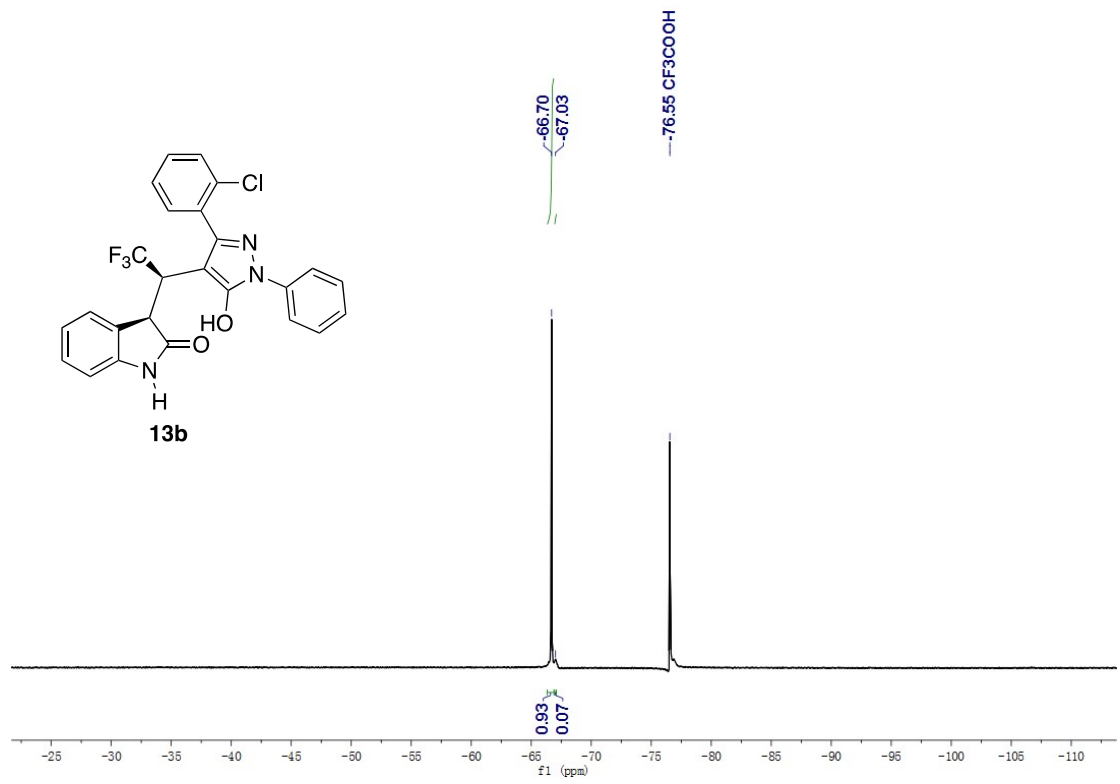

**(R)-3-((R)-1-(3-(3-chlorophenyl)-5-hydroxy-1-phenyl-1H-pyrazol-4-yl)-2,2,2-trifluoroethyl)indolin-2-one (13c)**

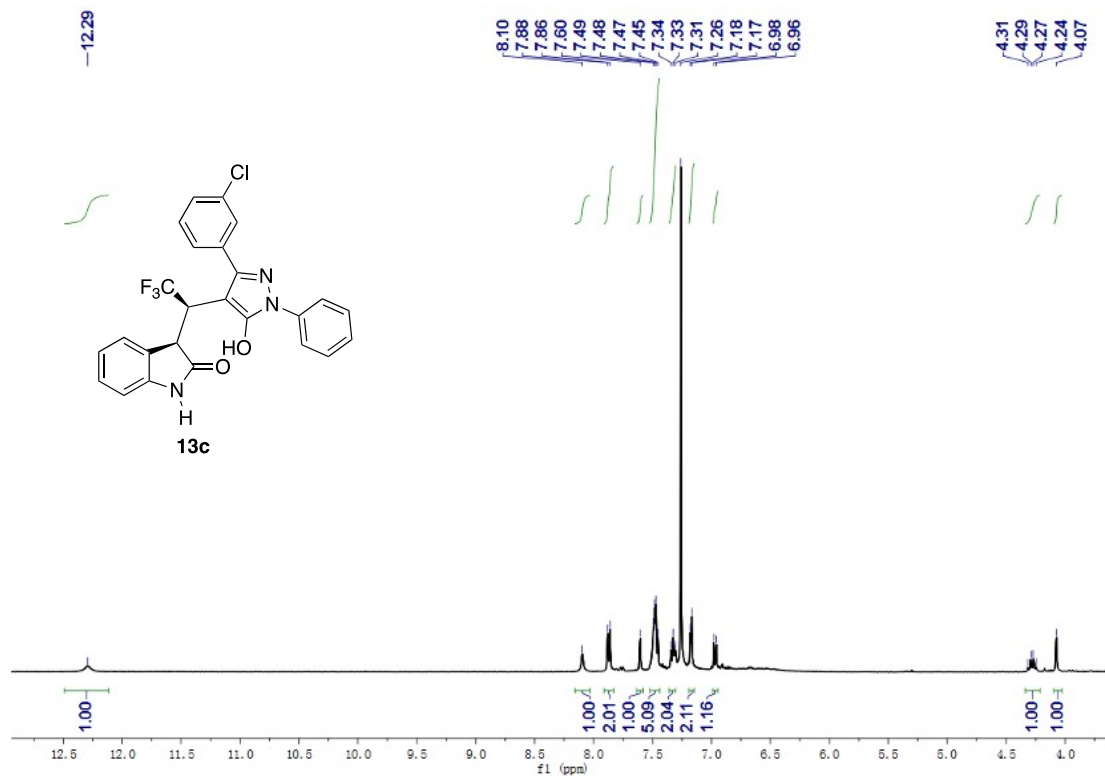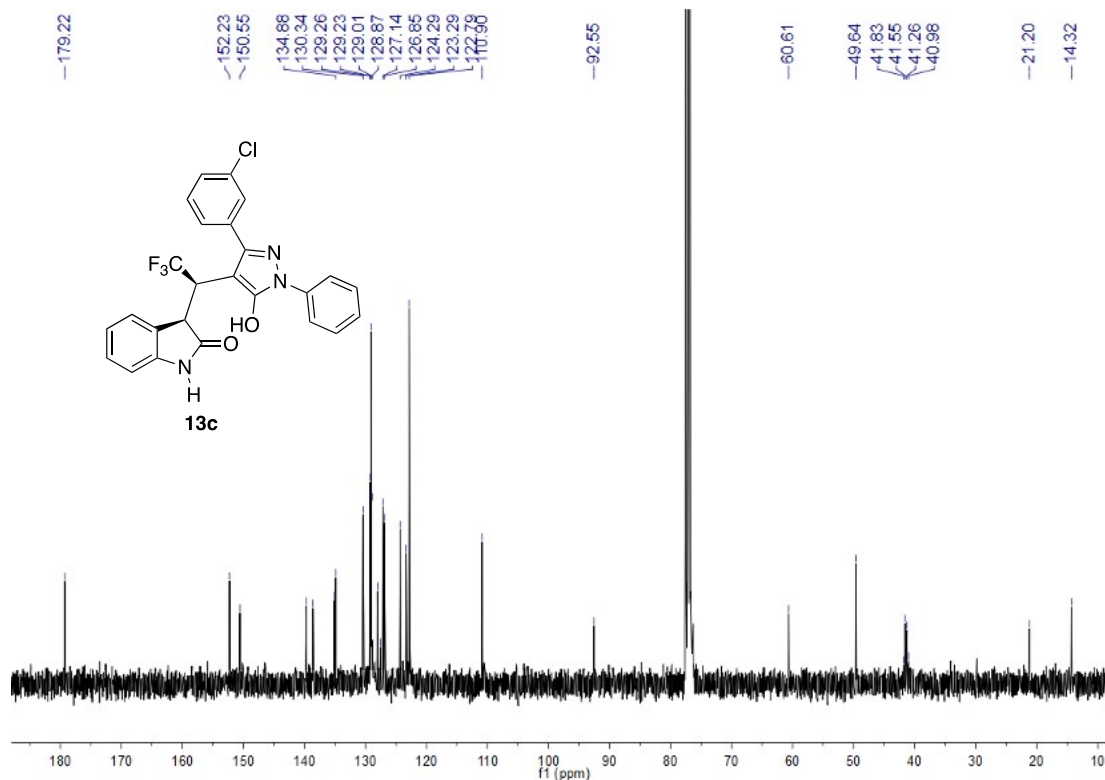

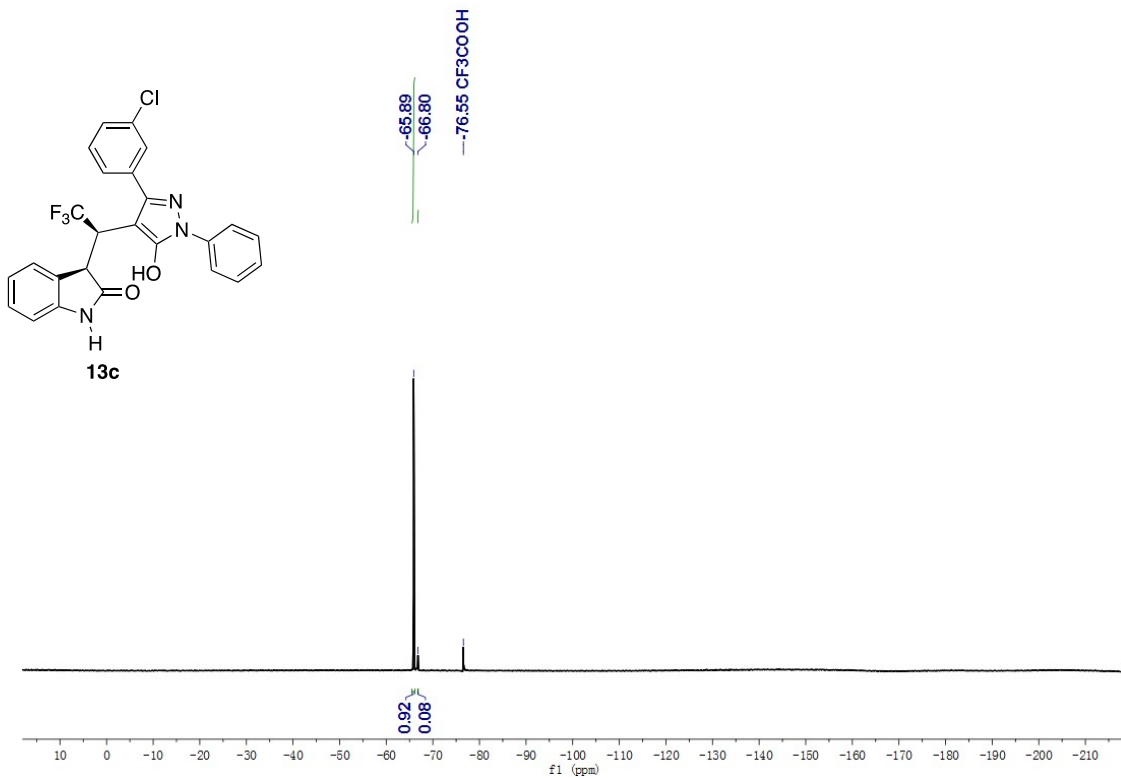

**(R)-3-((R)-1-(3-(4-chlorophenyl)-5-hydroxy-1-phenyl-1H-pyrazol-4-yl)-2,2,2-trifluoroethyl)indolin-2-one (13d)**

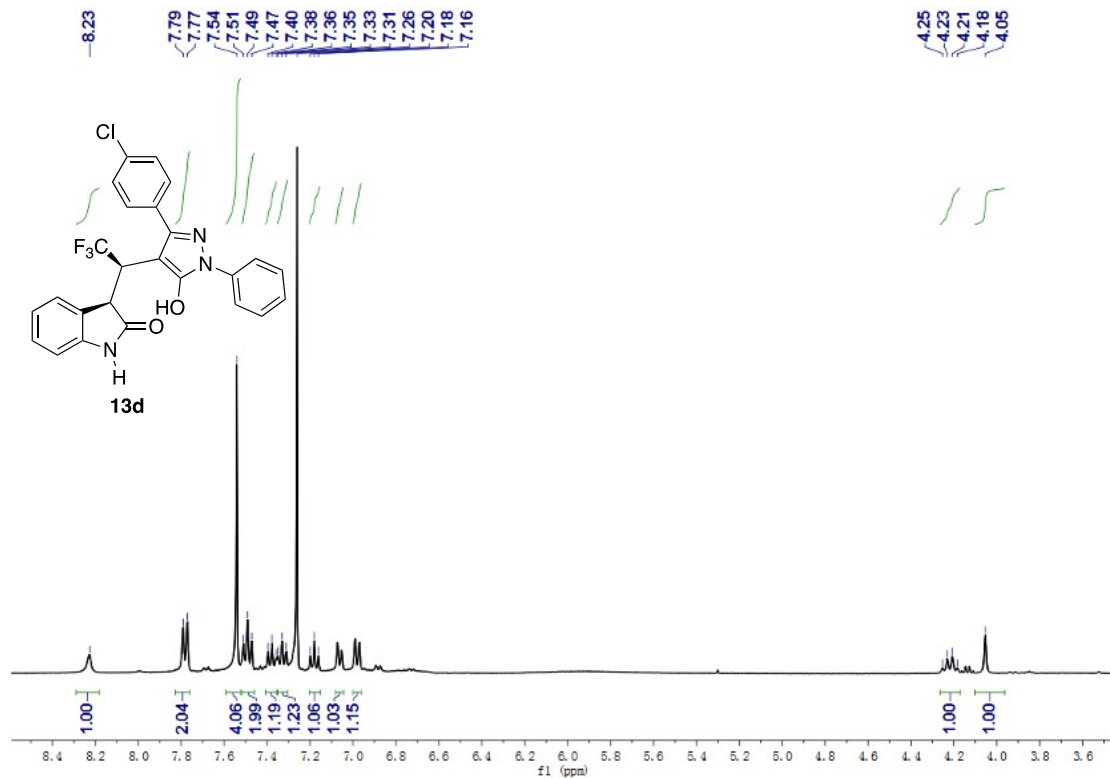



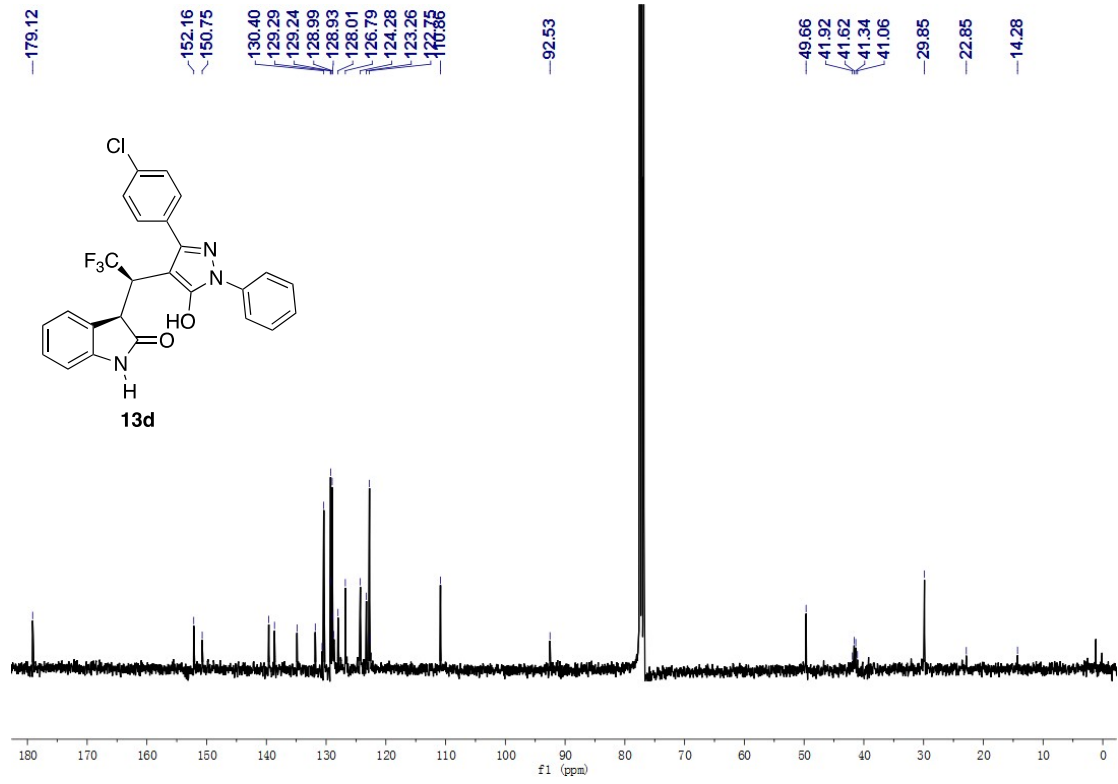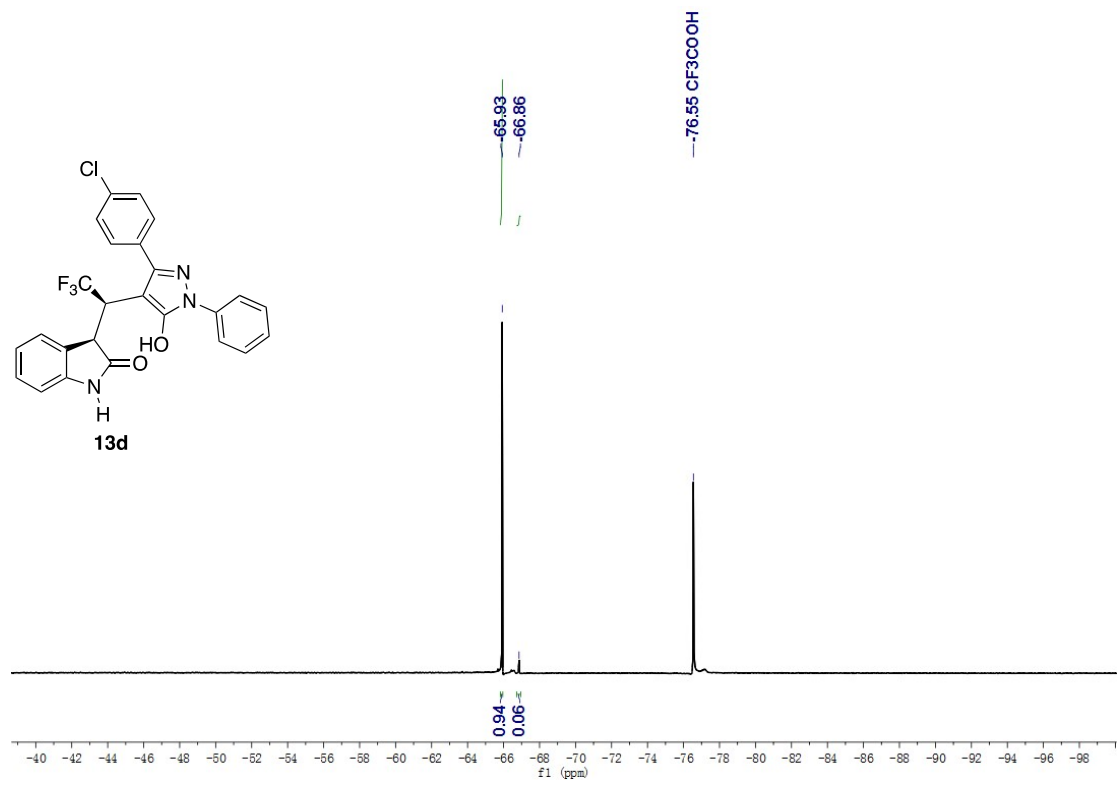

**(R)-3-((R)-2,2,2-trifluoro-1-(5-hydroxy-1-phenyl-3-(*p*-tolyl)-1*H*-pyrazol-4-yl)ethyl)indolin-2-one (13e)**

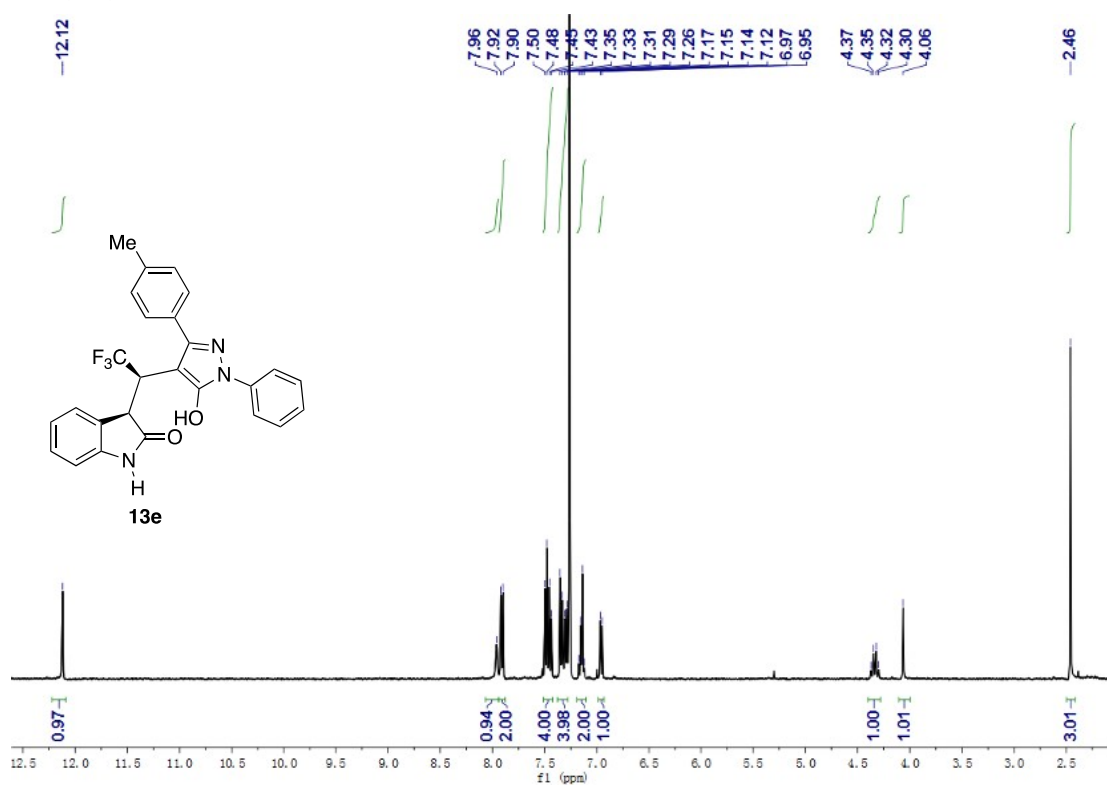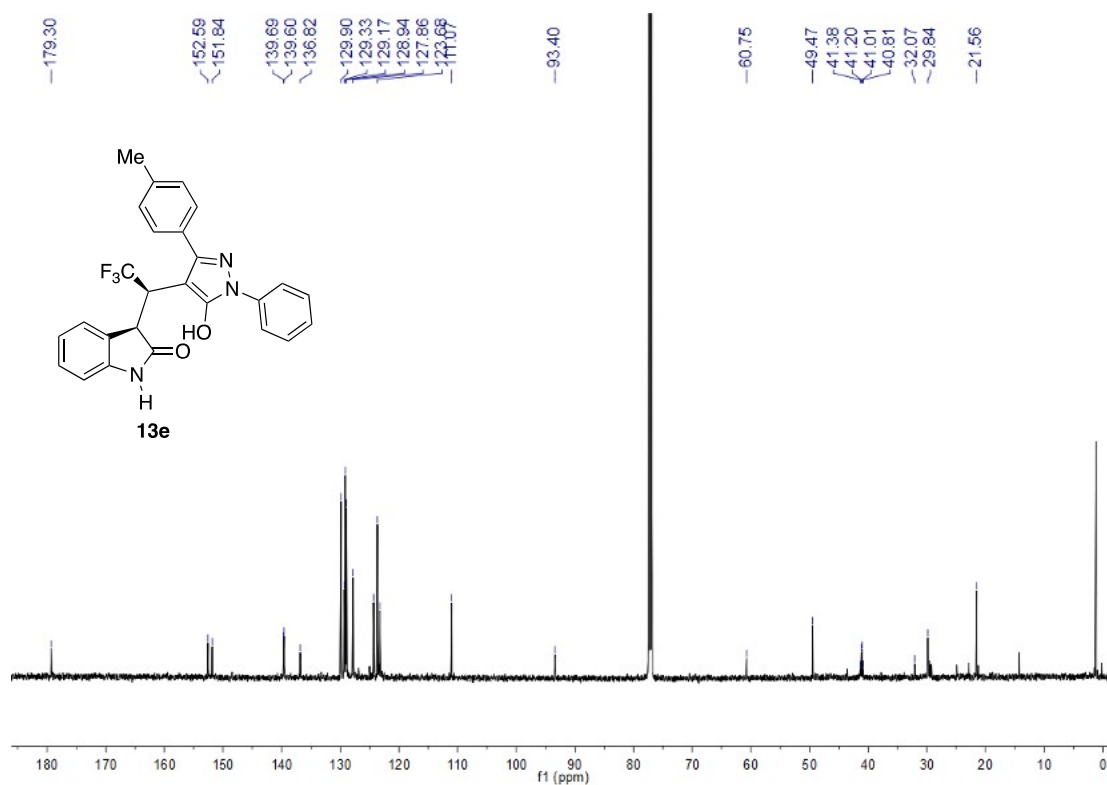

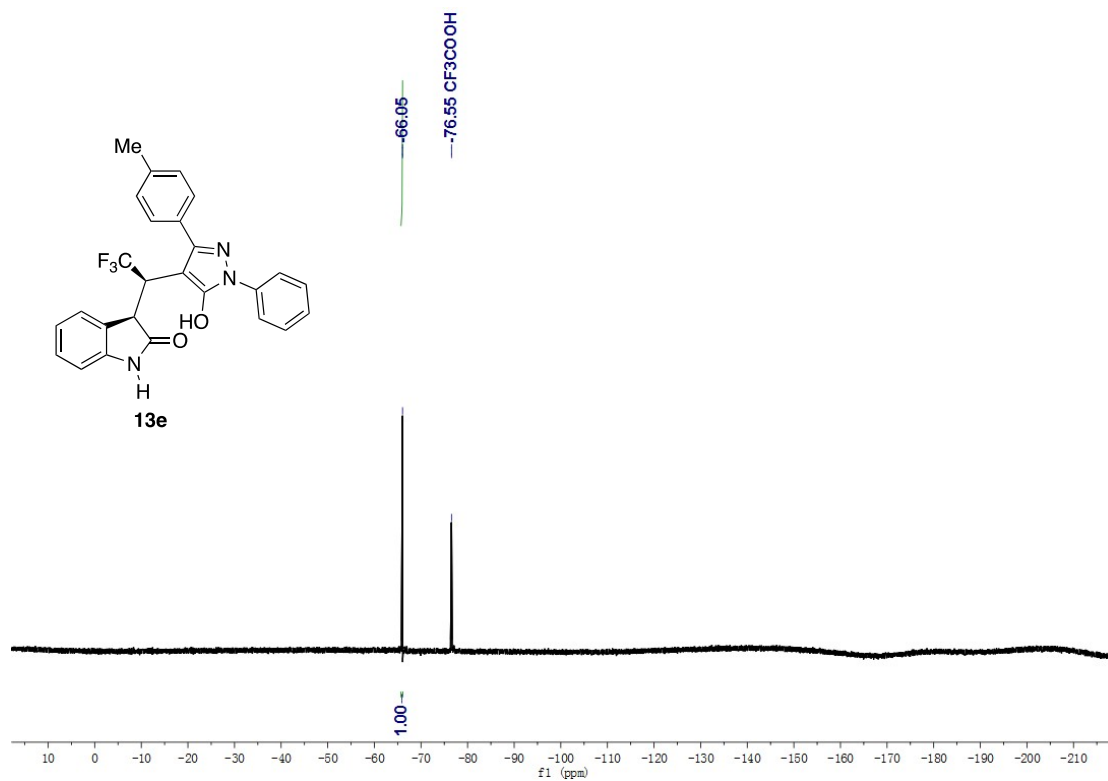

**(R)-3-((R)-2,2,2-trifluoro-1-(5-hydroxy-1-phenyl-3-(*m*-tolyl)-1*H*-pyrazol-4-yl)ethyl)indolin-2-one (13f)**

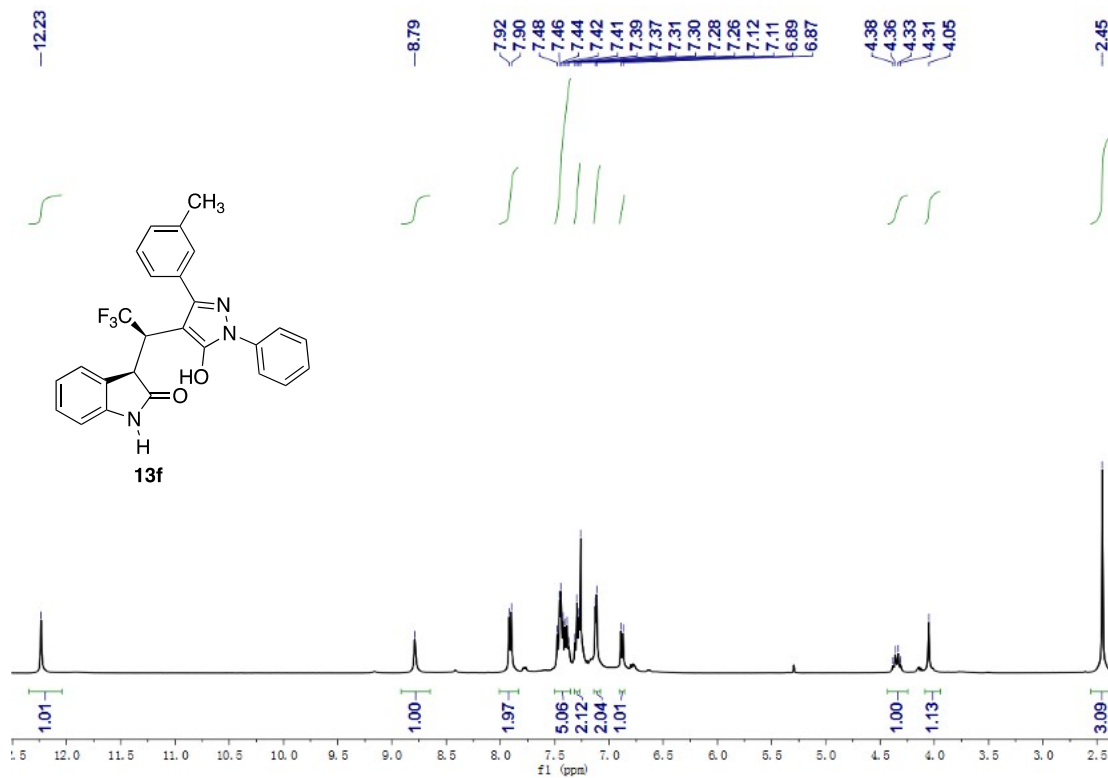

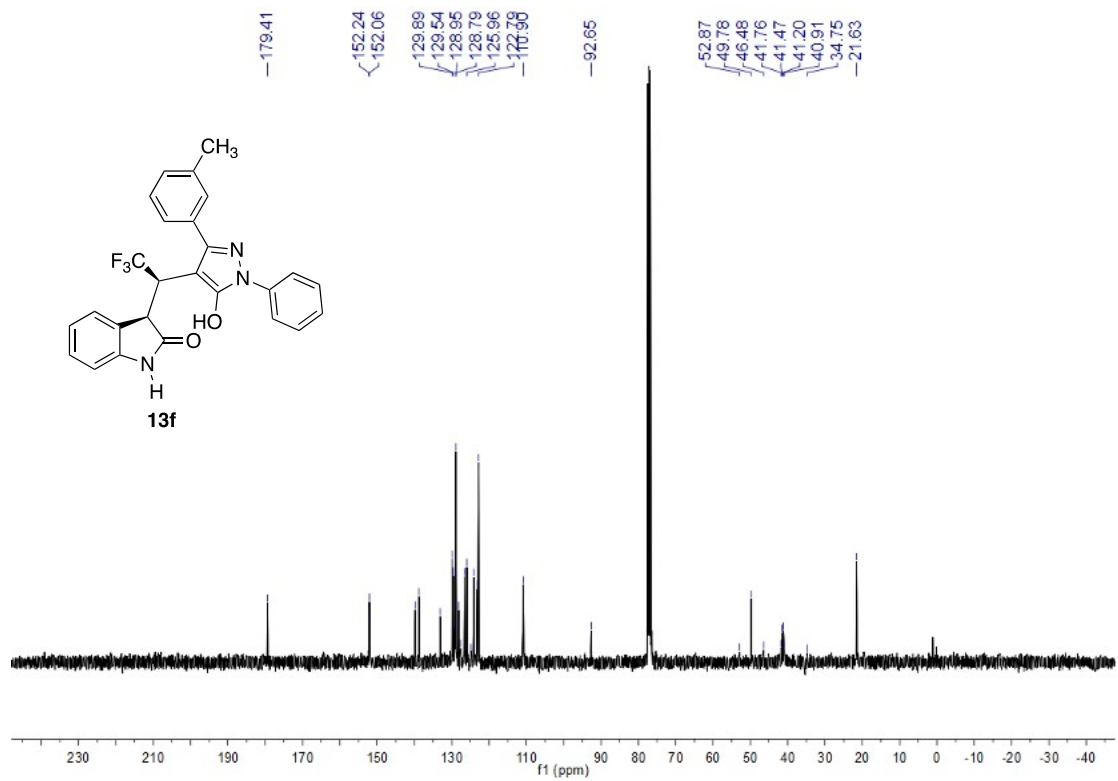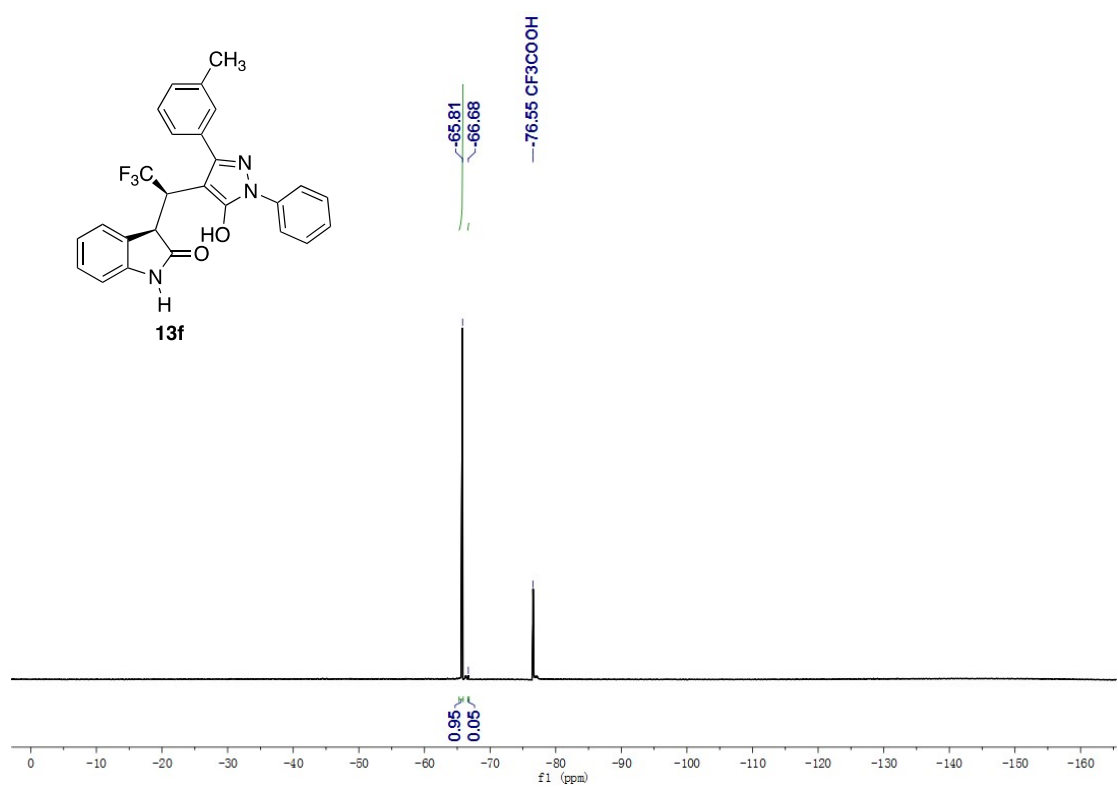

**(R)-3-((R)-2,2,2-trifluoro-1-(5-hydroxy-1-(2-methoxyphenyl)-3-phenyl-1H-pyrazol-4-yl)ethyl)indolin-2-one (13g)**

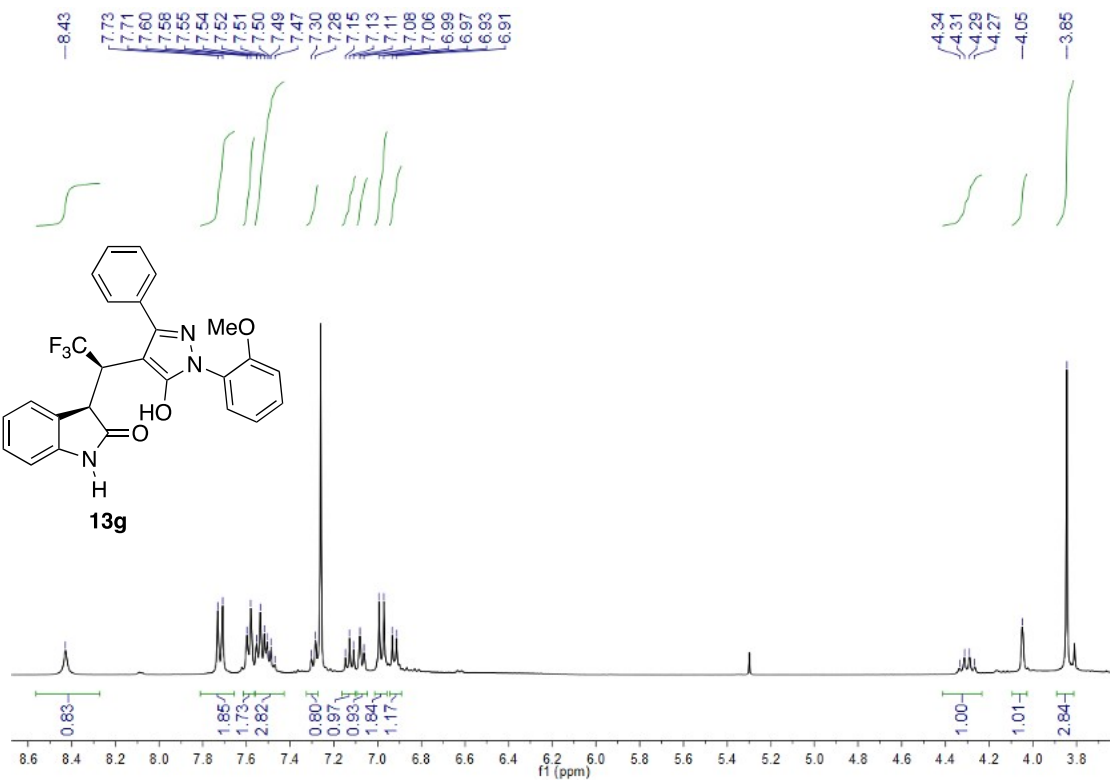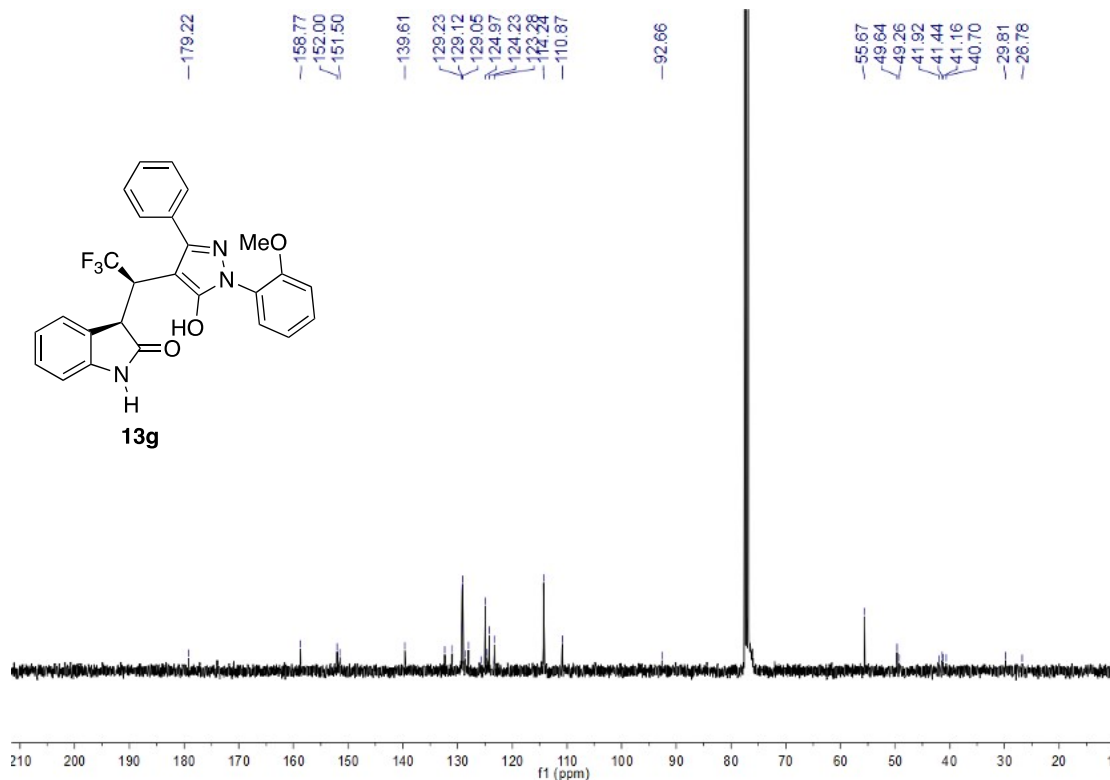

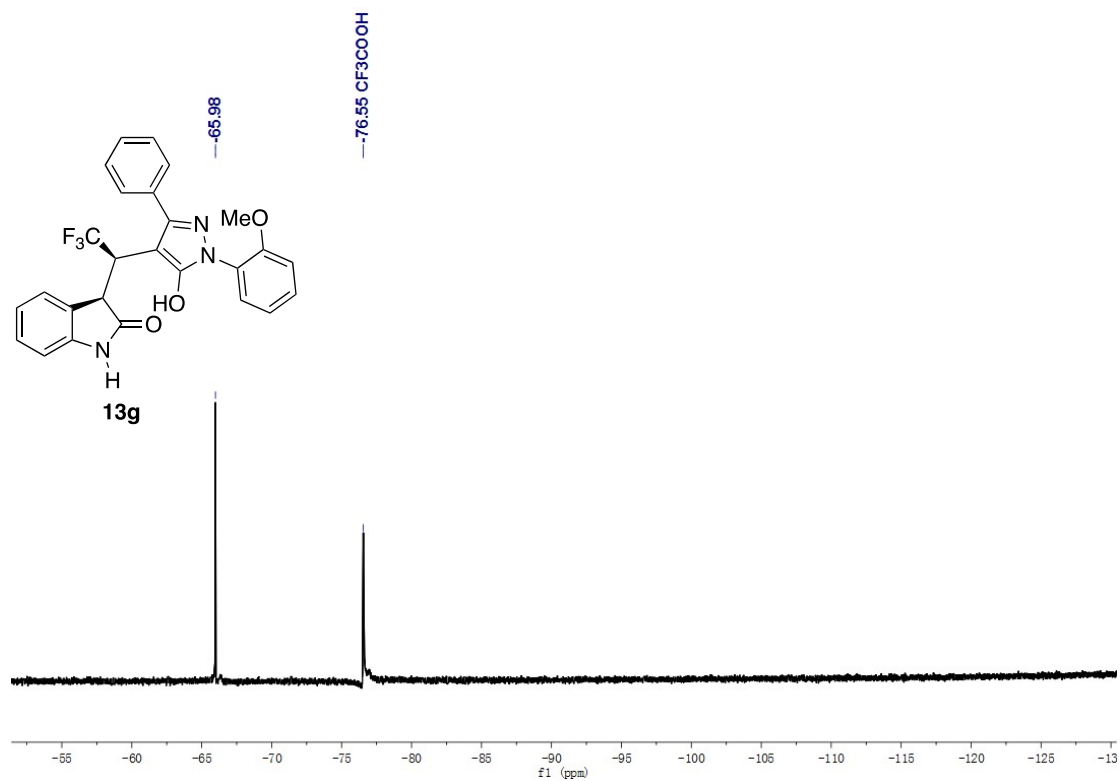

**(R)-3-((R)-2,2,2-trifluoro-1-(5-hydroxy-1-(4-methoxyphenyl)-3-phenyl-1H-pyrazol-4-yl)ethyl)indolin-2-one (13h)**

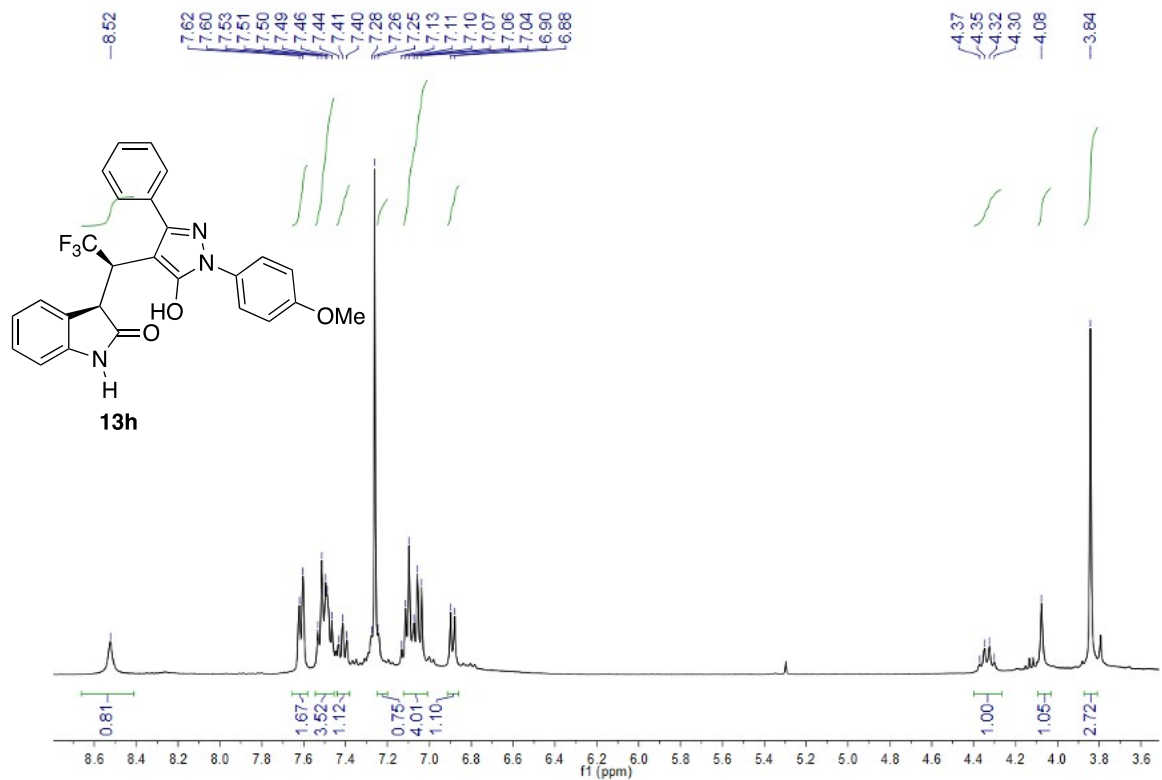

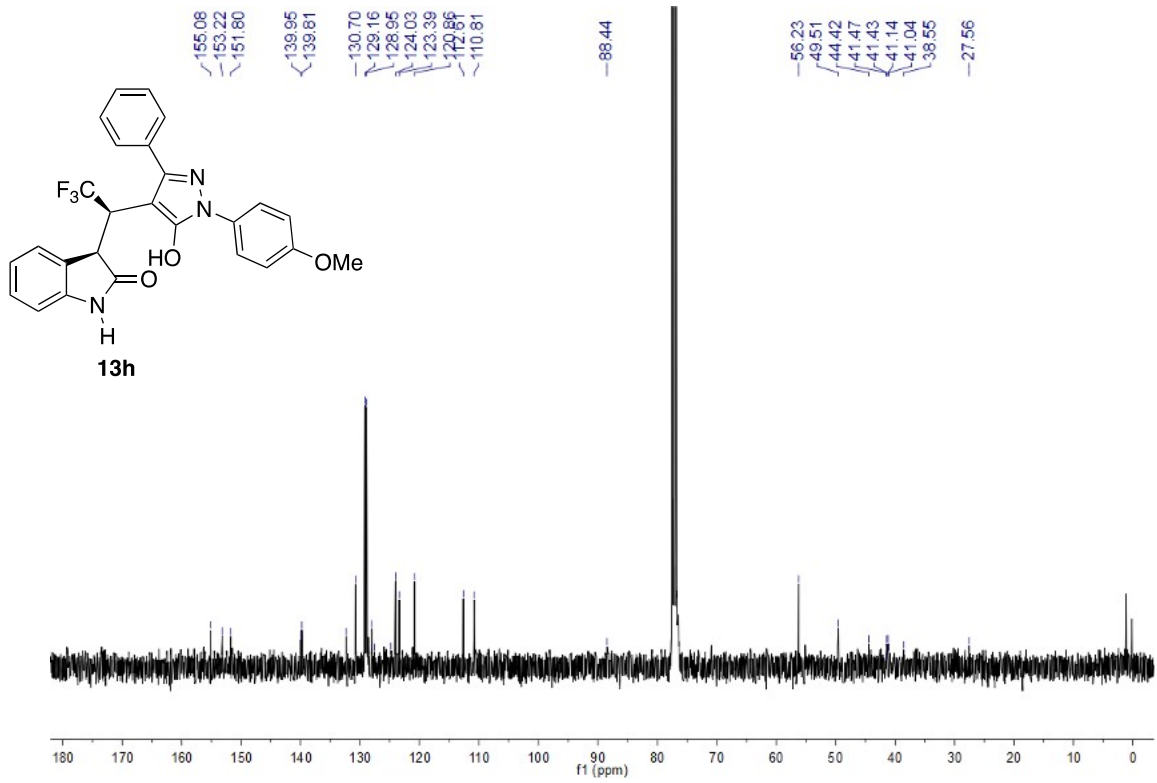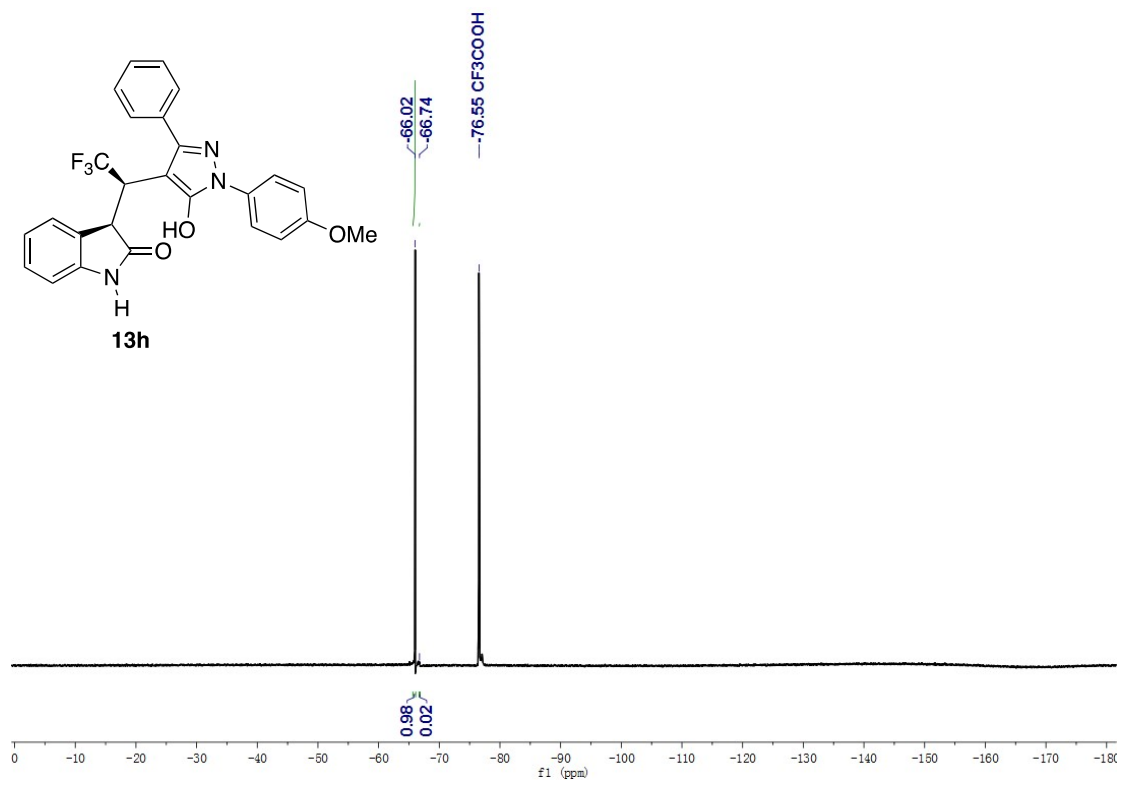

**(R)-3-((R)-1-(1-(4-chlorophenyl)-5-hydroxy-3-phenyl-1H-pyrazol-4-yl)-2,2,2-trifluoroethyl)indolin-2-one (13i)**

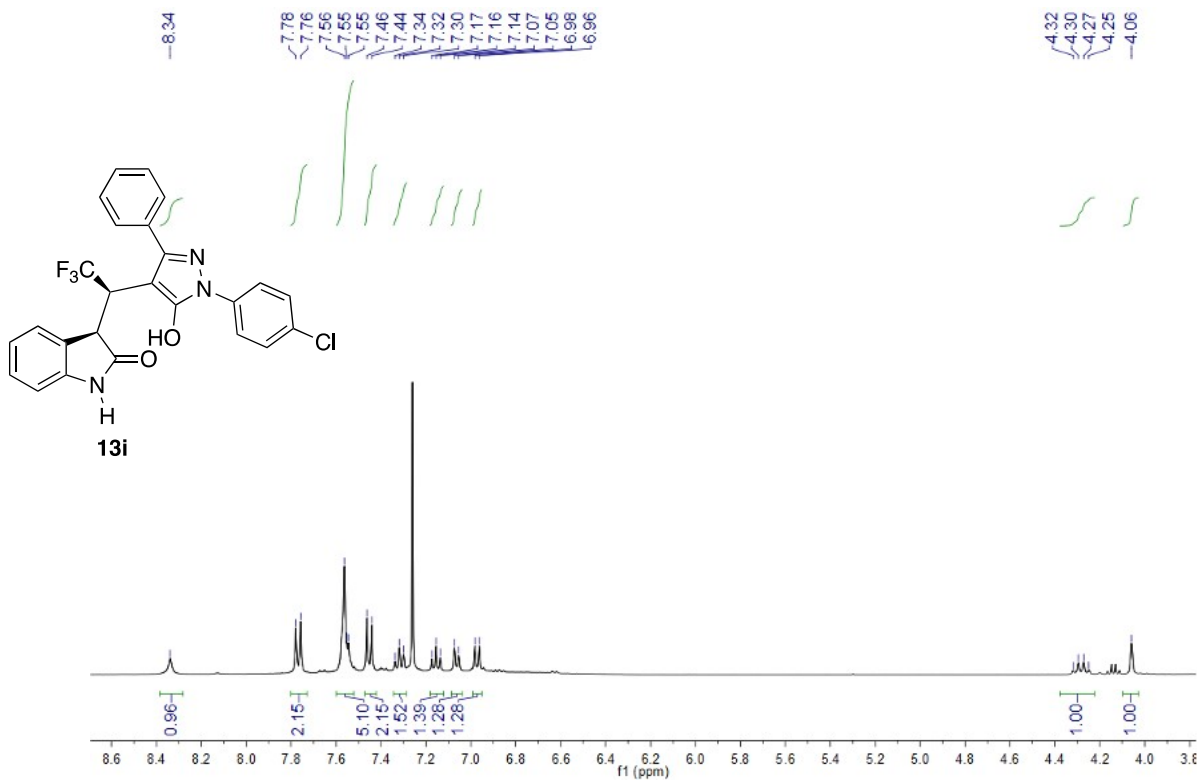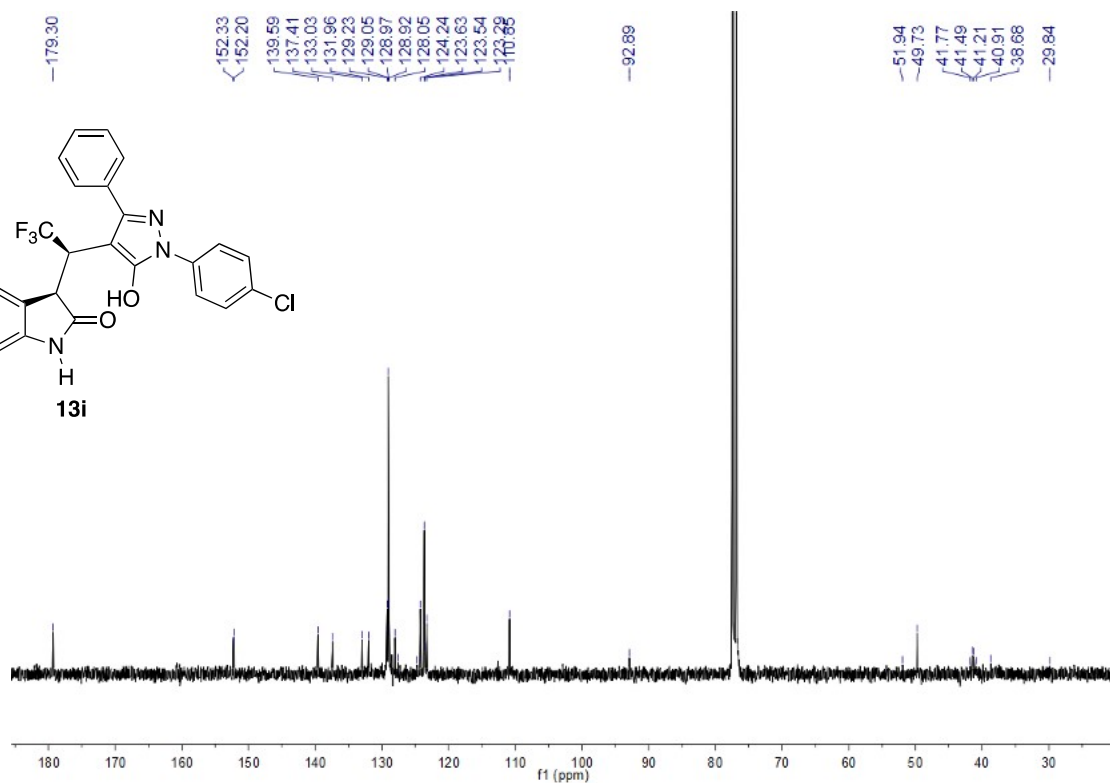



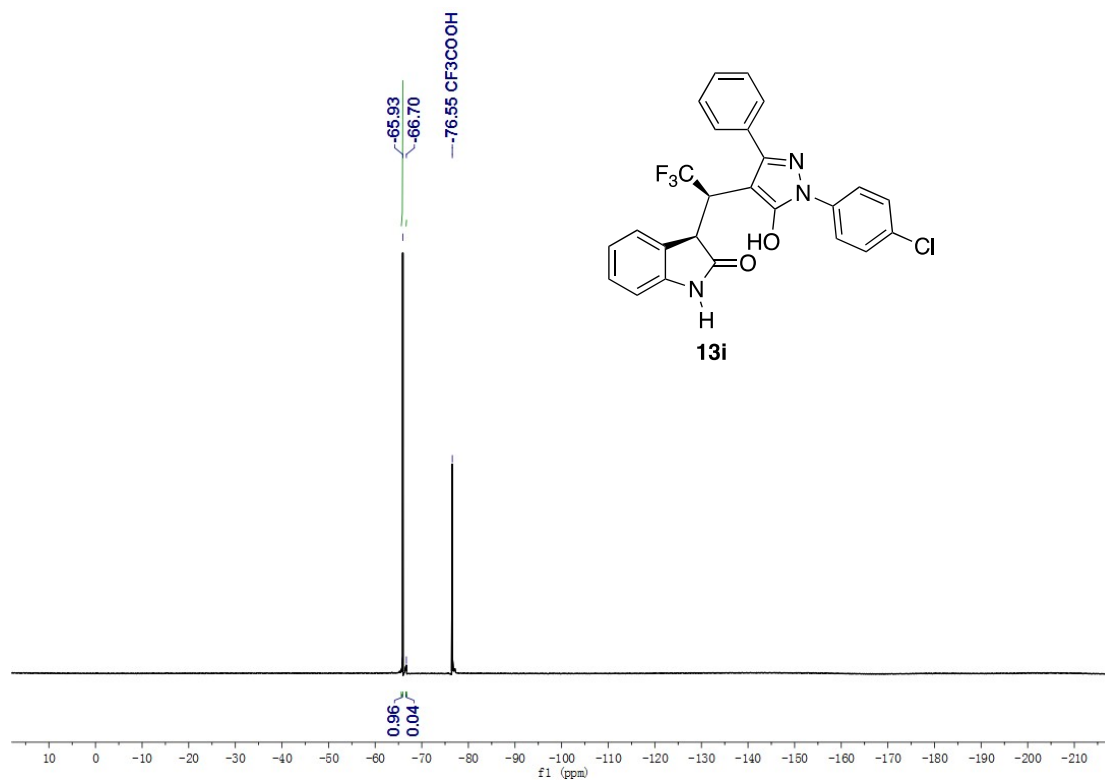

**(R)-3-((R)-1-(1-(3-chlorophenyl)-5-hydroxy-3-phenyl-1H-pyrazol-4-yl)-2,2,2-trifluoroethyl)indolin-2-one (13j)**

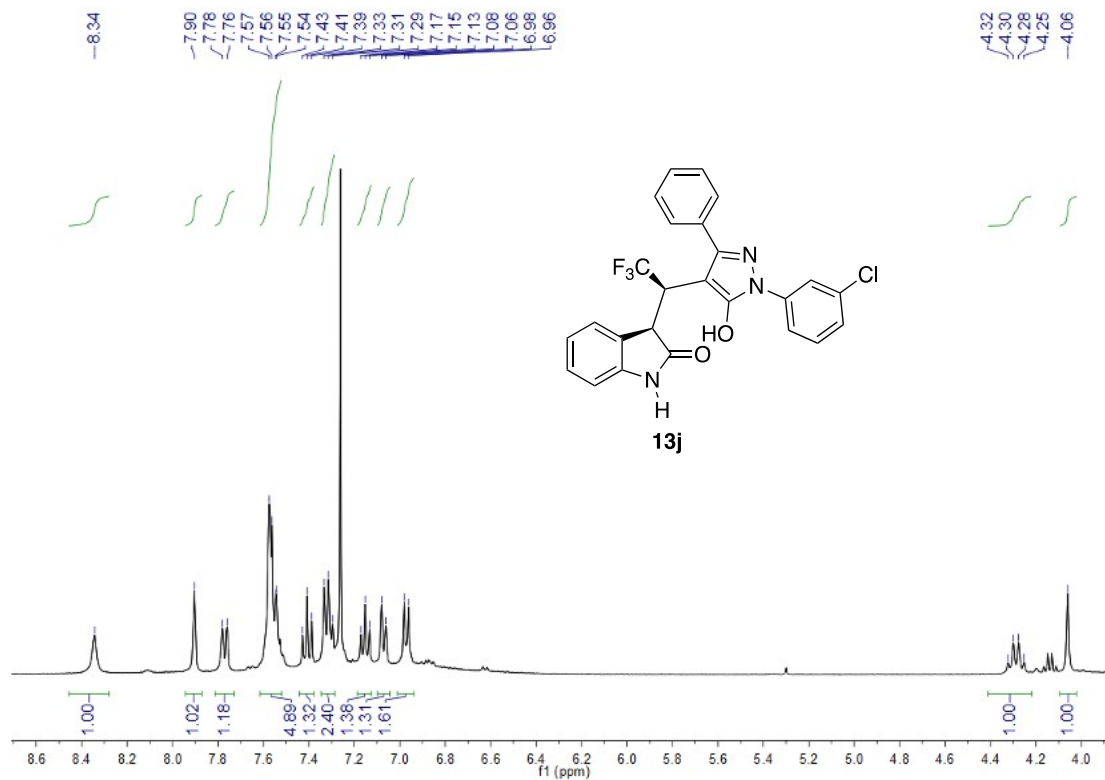

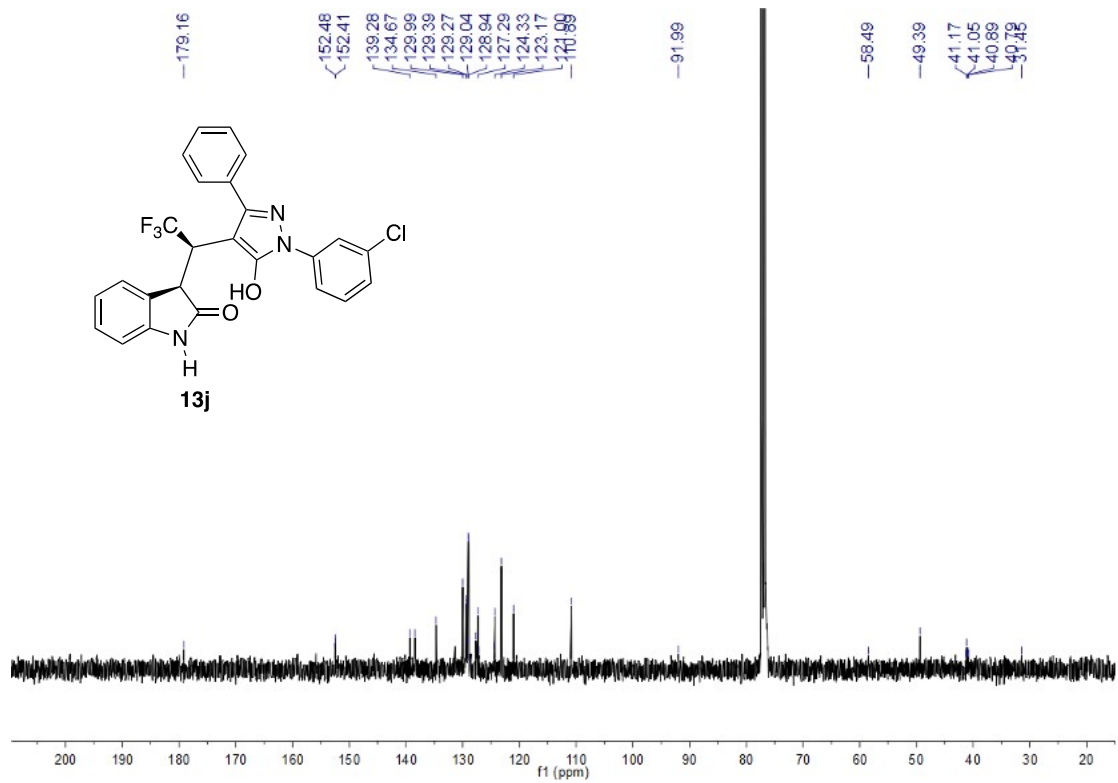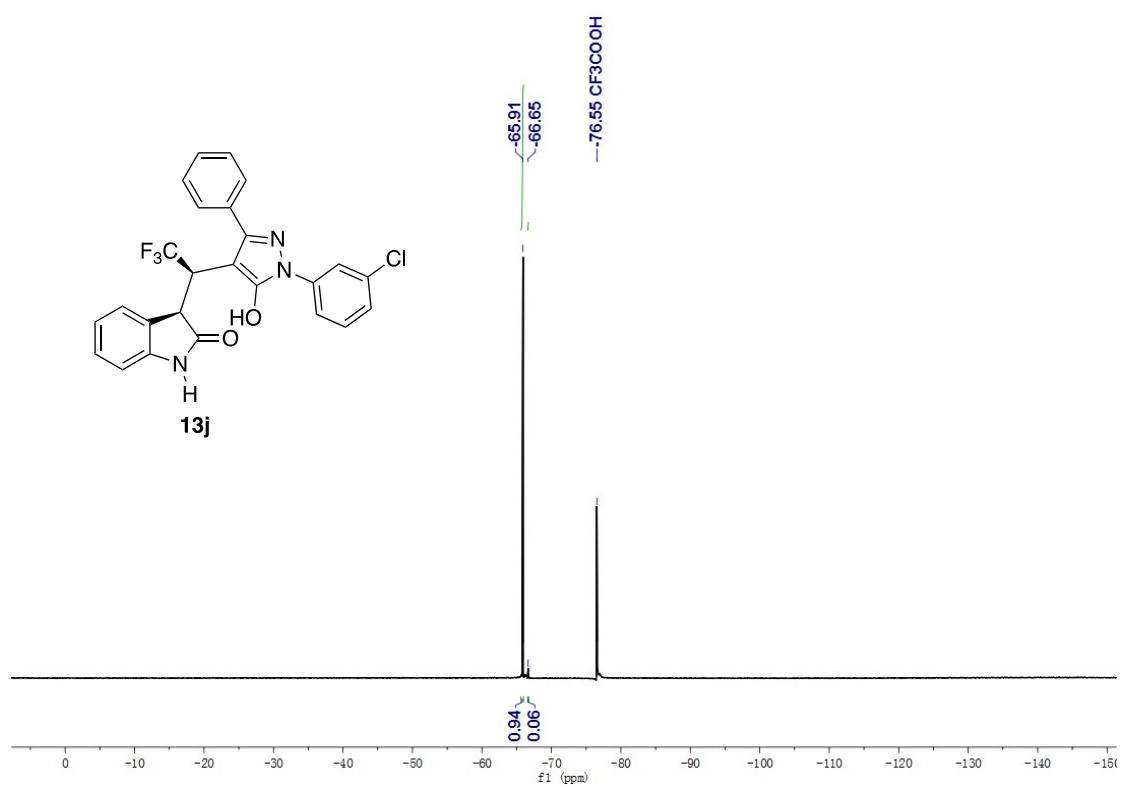

**(R)-3-((R)-1-(1-(2-chlorophenyl)-5-hydroxy-3-phenyl-1H-pyrazol-4-yl)-2,2,2-trifluoroethyl)indolin-2-one (13k)**

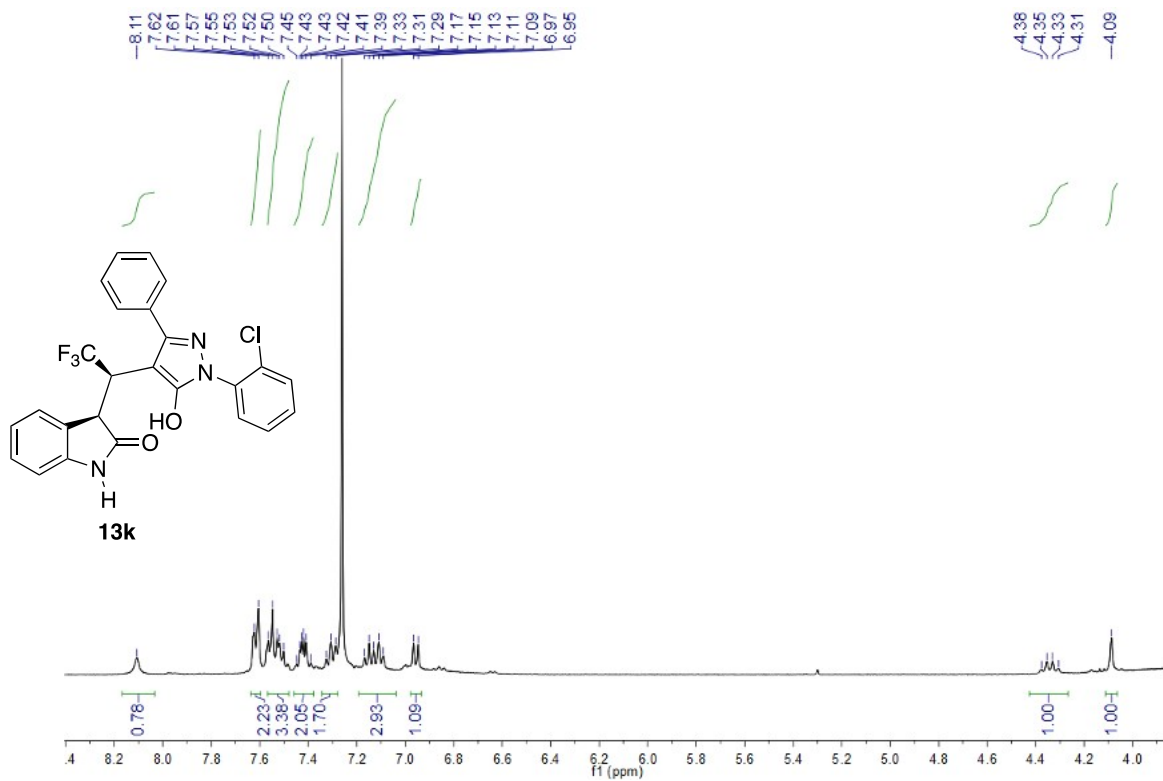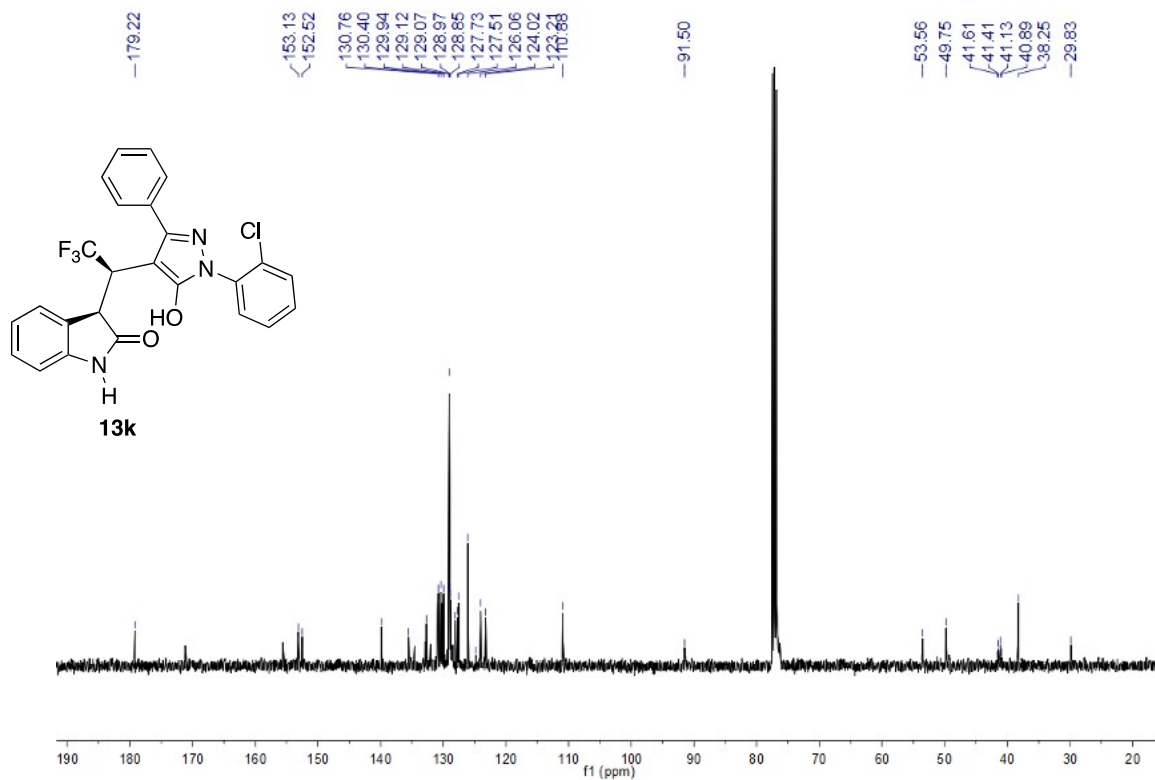

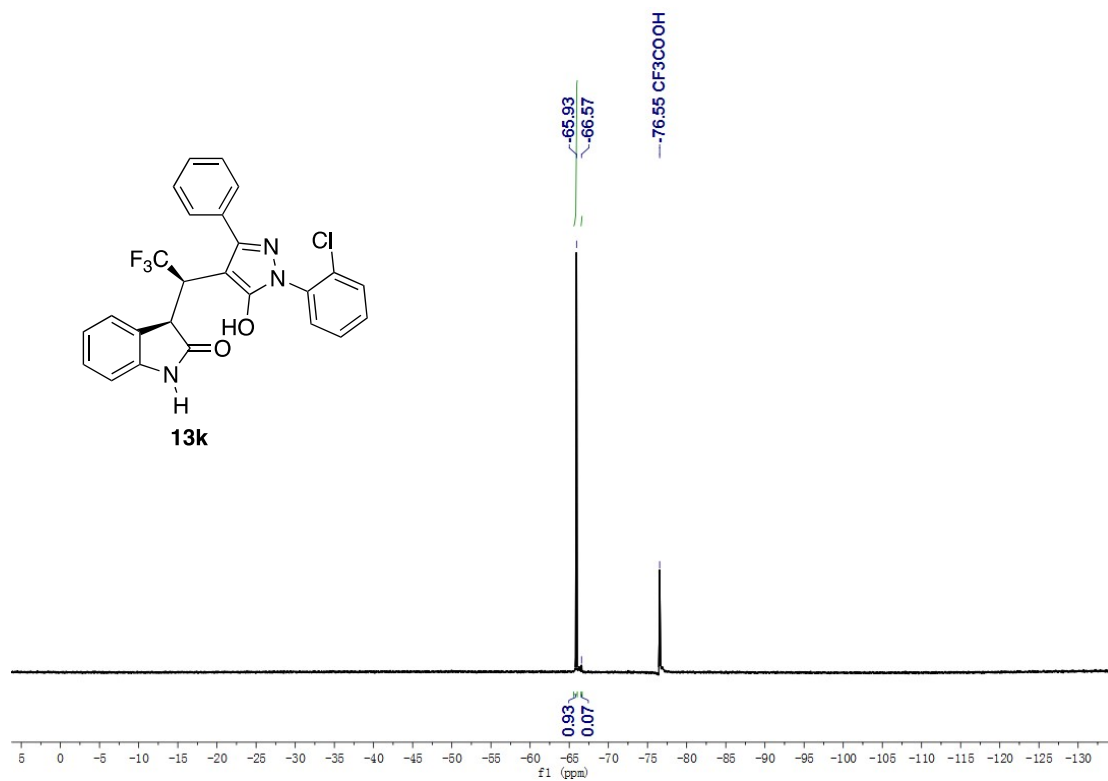

**(R)-4-bromo-3-((R)-2,2,2-trifluoro-1-(5-hydroxy-1,3-diphenyl-1H-pyrazol-4-yl)ethyl)indolin-2-one (13l)**

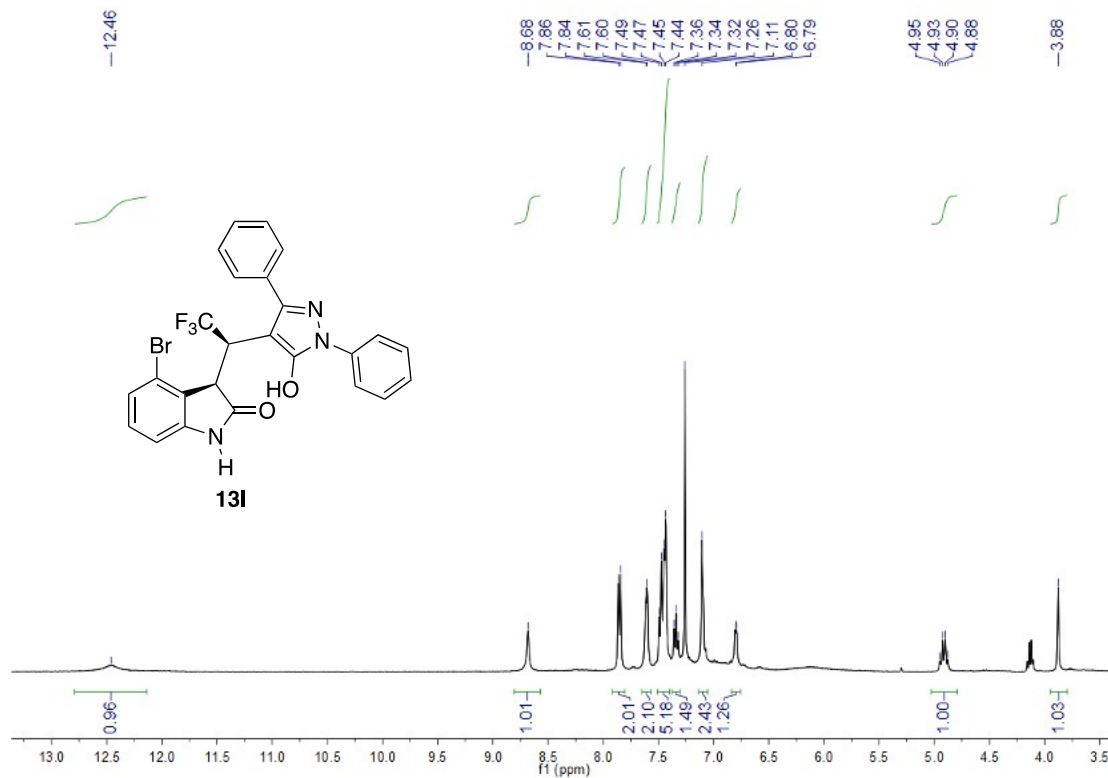

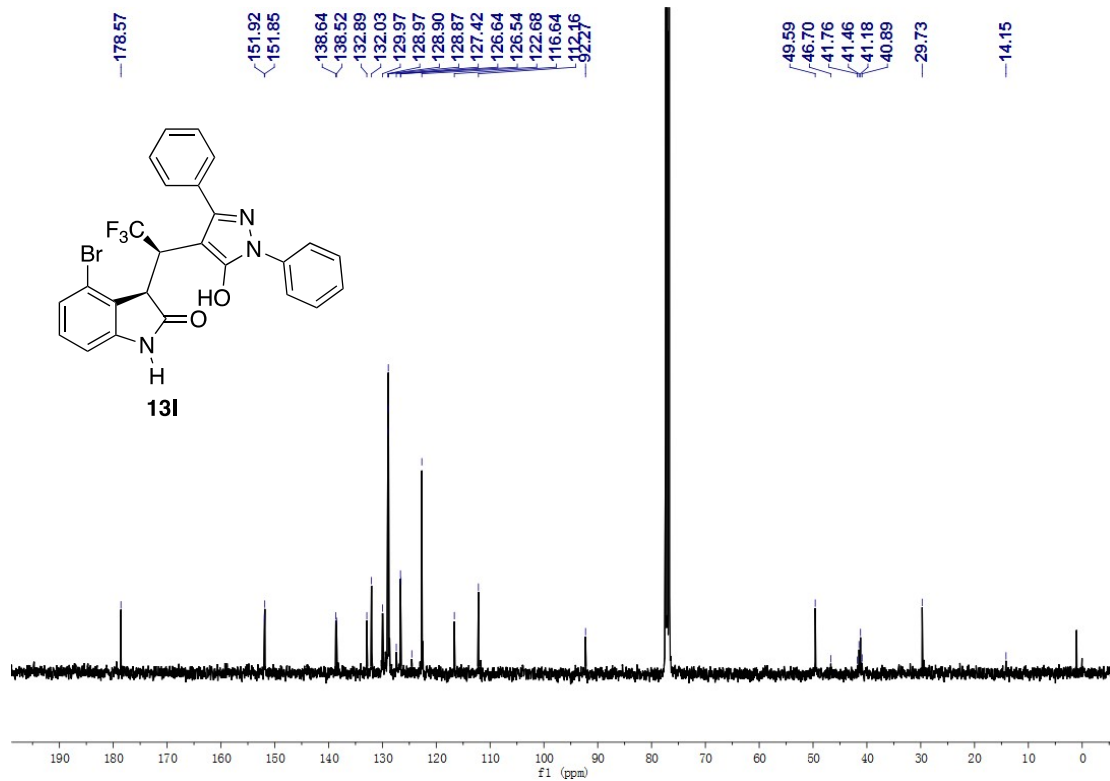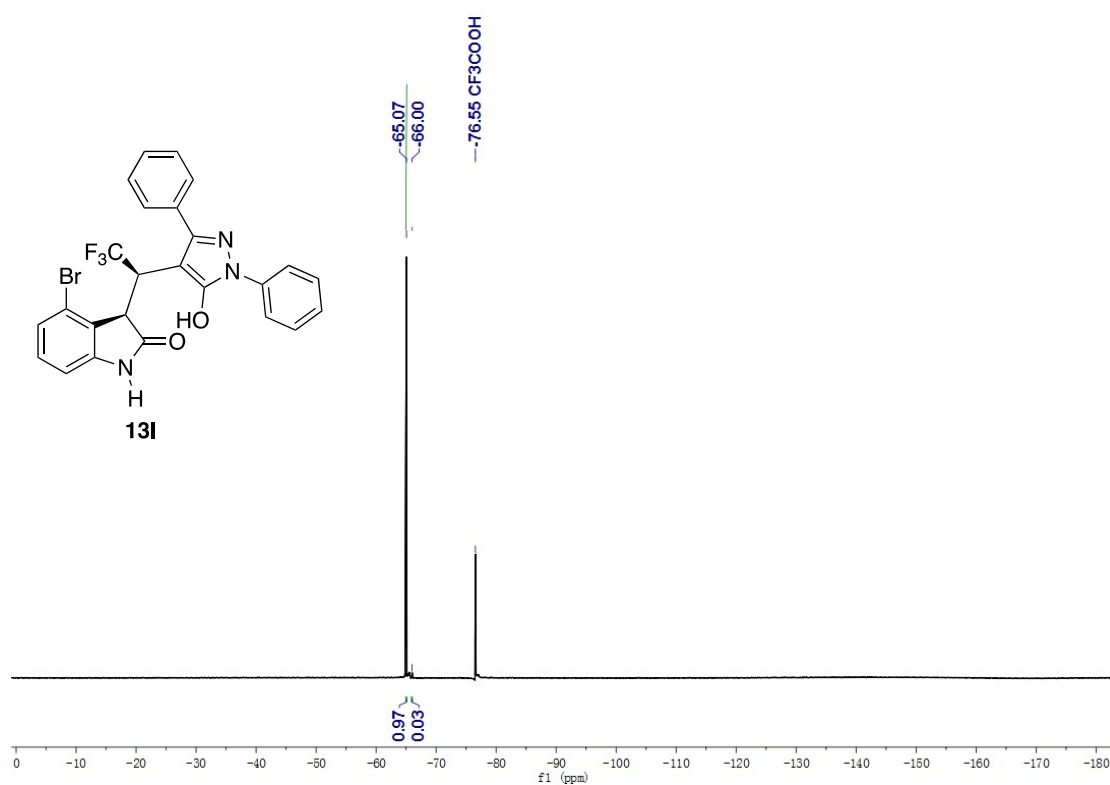

**(R)-6-bromo-3-((R)-2,2,2-trifluoro-1-(5-hydroxy-1,3-diphenyl-1H-pyrazol-4-yl)ethyl)indolin-2-one (13m)**

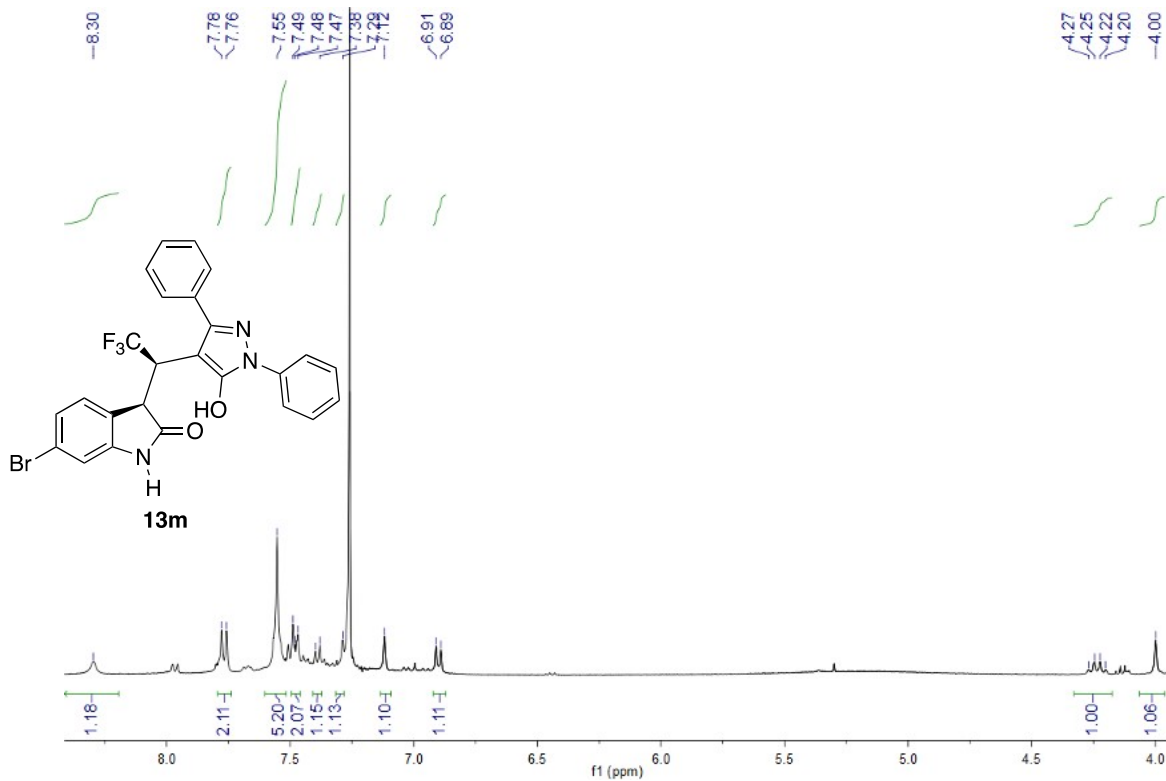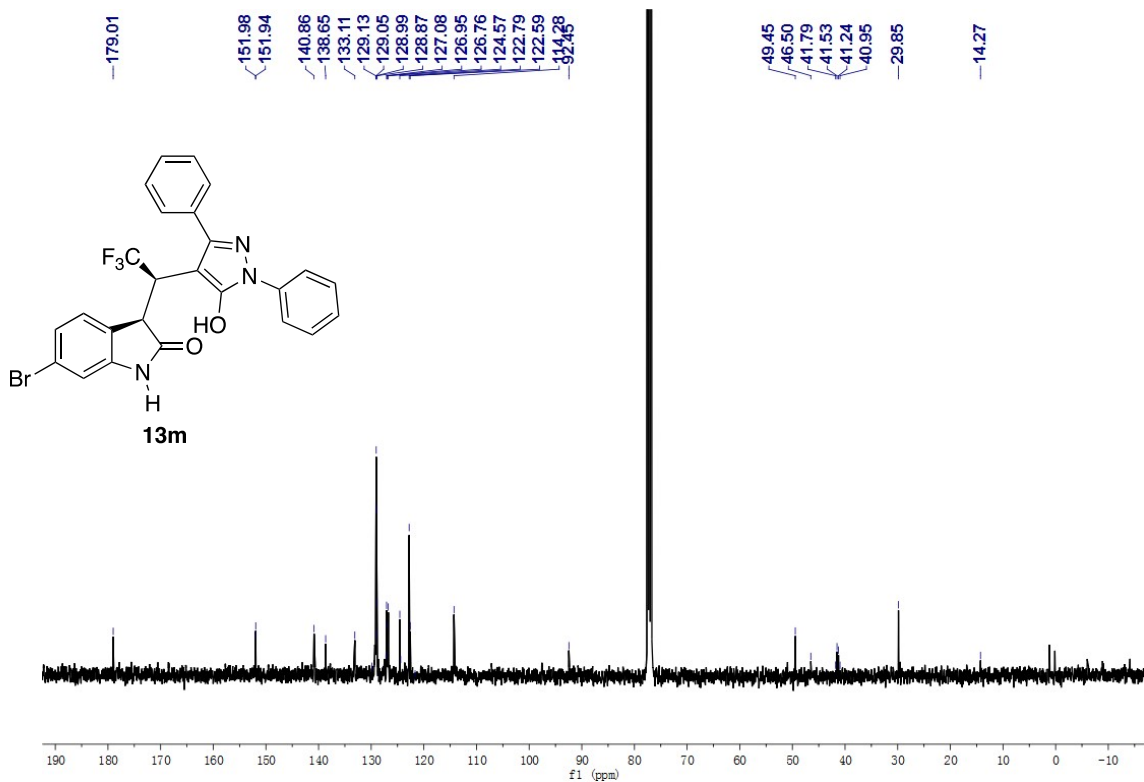

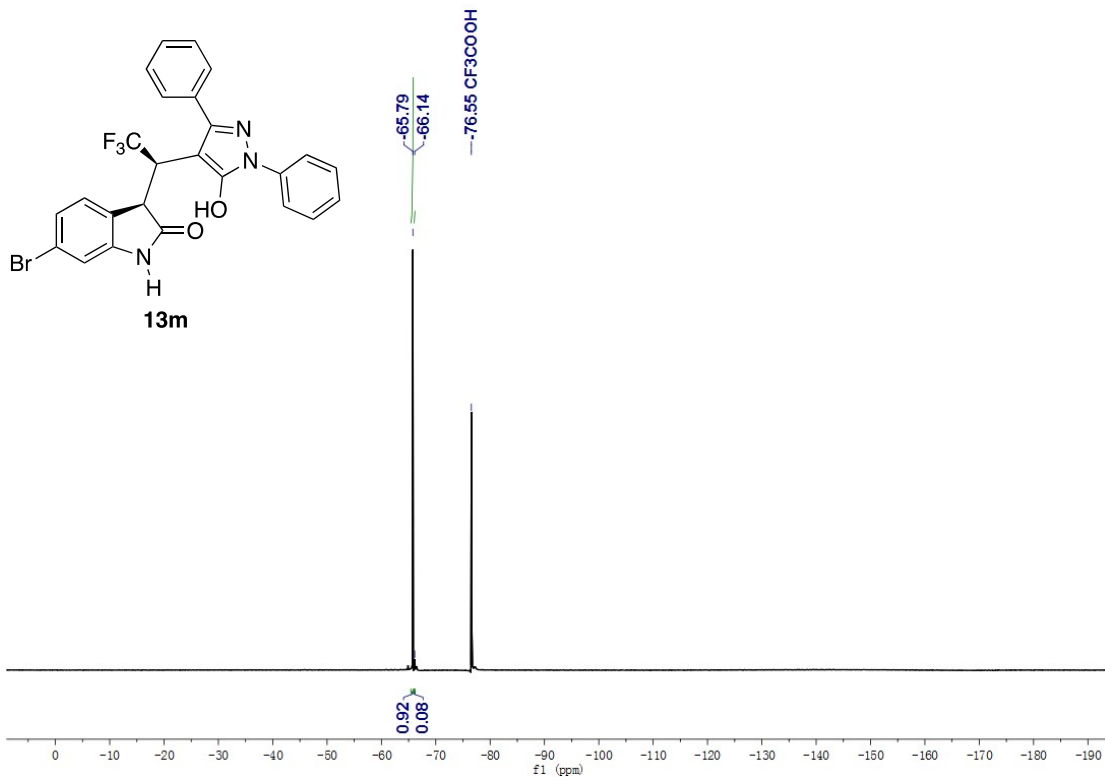

**(R)-4-methyl-3-((R)-2,2,2-trifluoro-1-(5-hydroxy-1,3-diphenyl-1H-pyrazol-4-yl)ethyl)indolin-2-one (13n)**

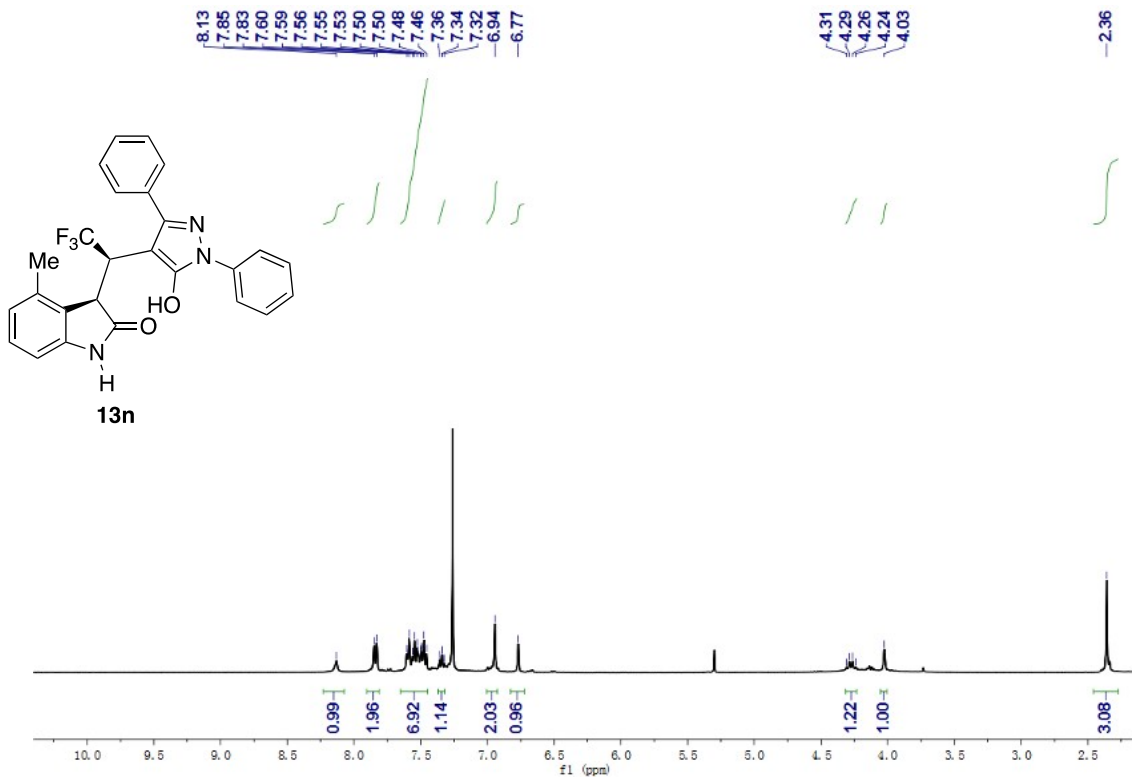

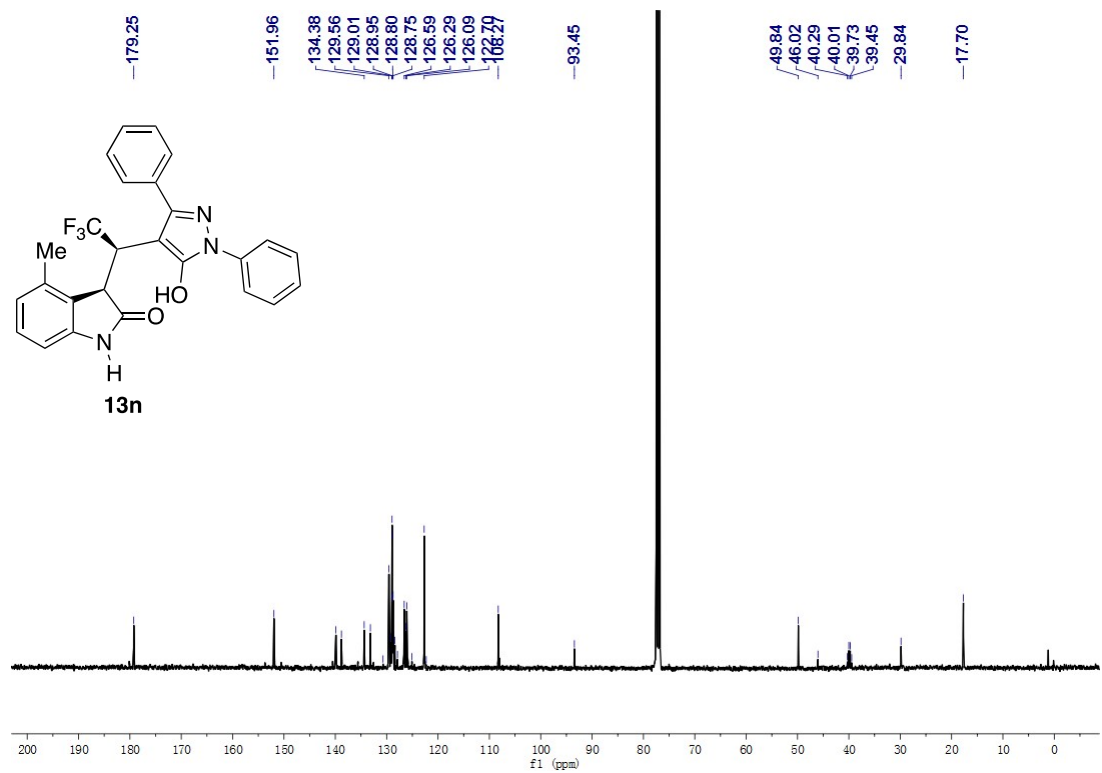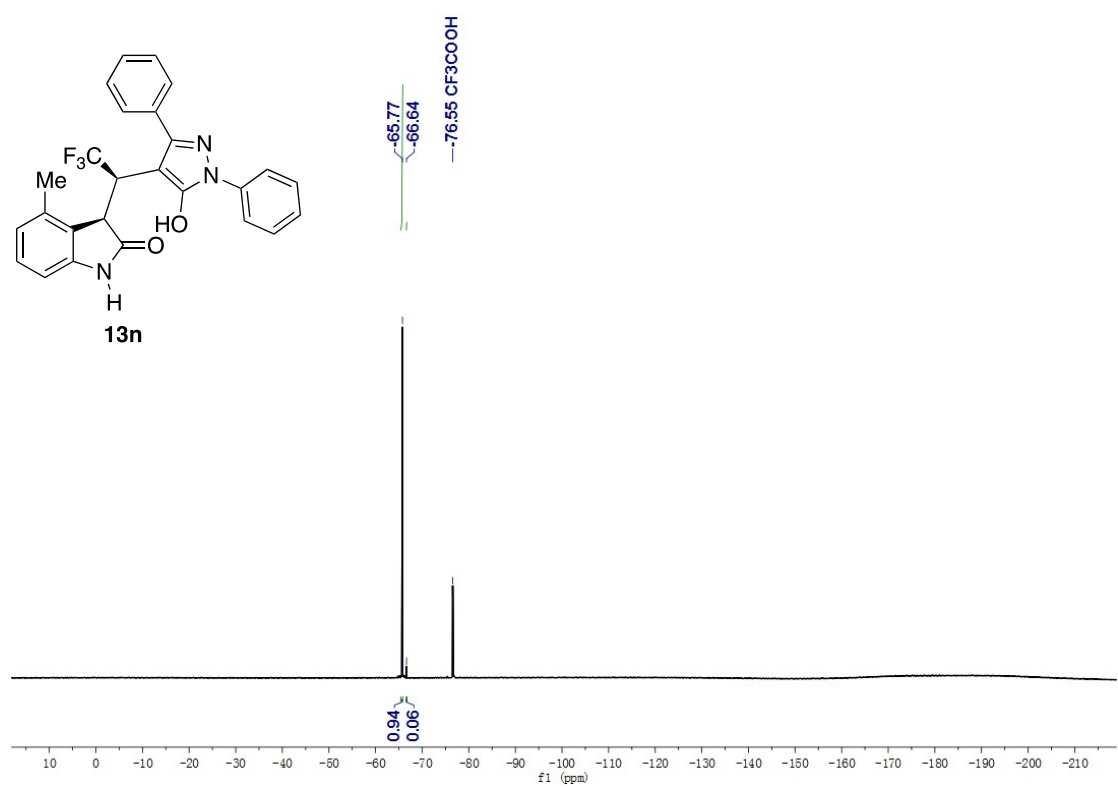



Methyl (*R*)-2-(5-hydroxy-1,3-diphenyl-1*H*-pyrazol-4-yl)-2-((*R*)-2-oxoindolin-3-yl)acetate (**13o**)

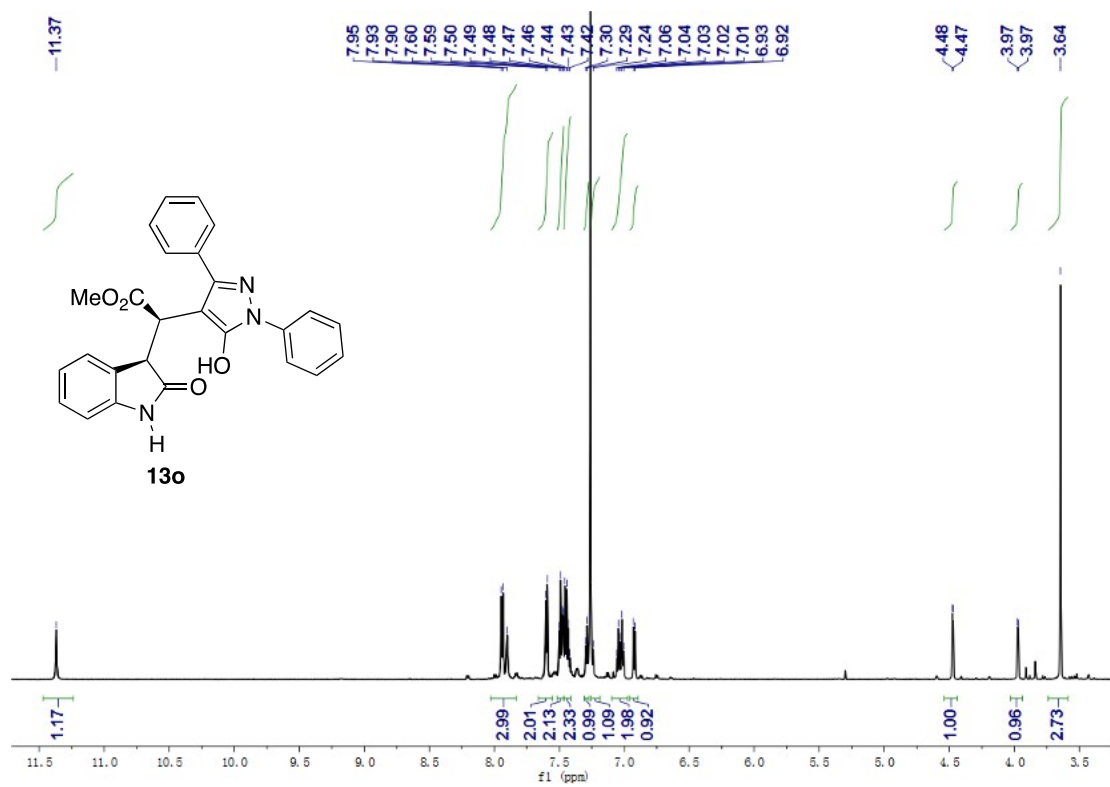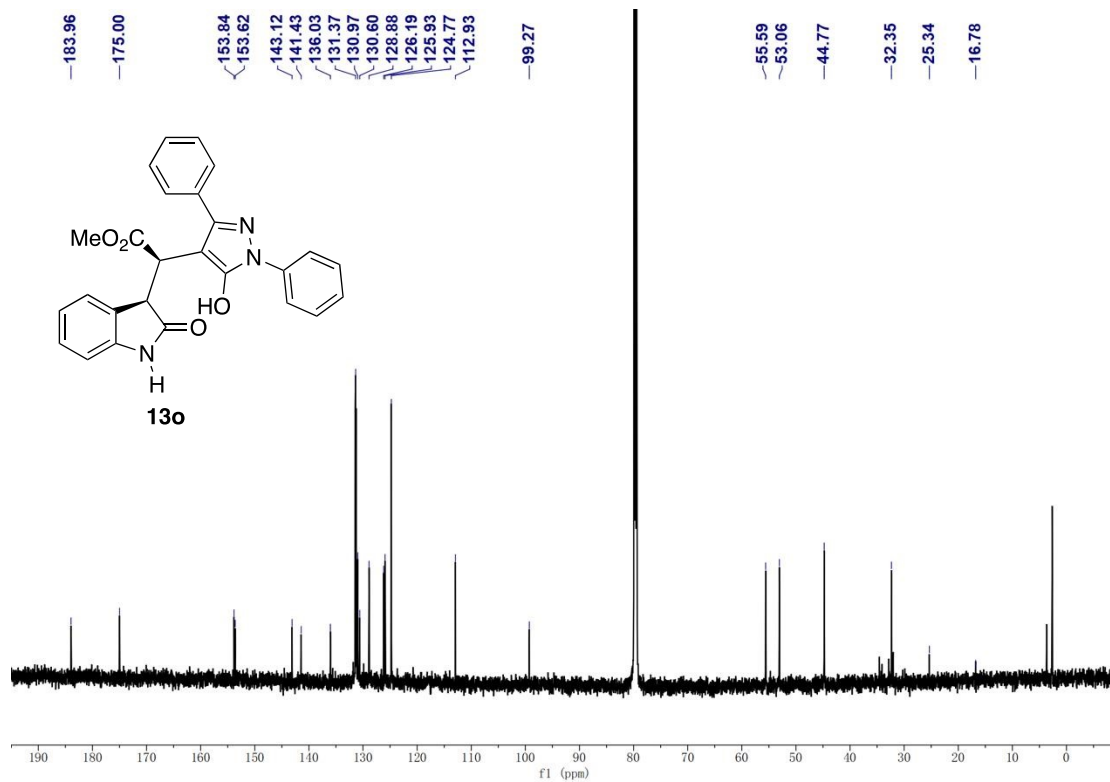

**Benzyl (*R*)-2-(5-hydroxy-1,3-diphenyl-1*H*-pyrazol-4-yl)-2-((*R*)-2-oxoindolin-3-yl)acetate (**13p**)**

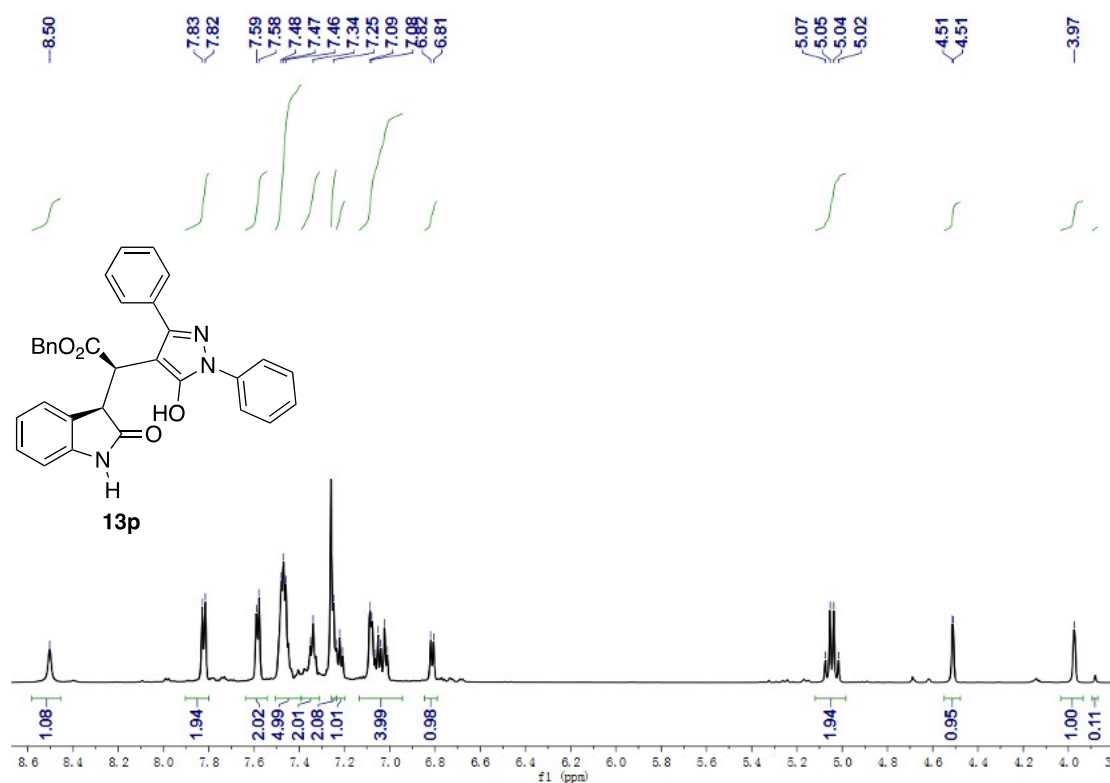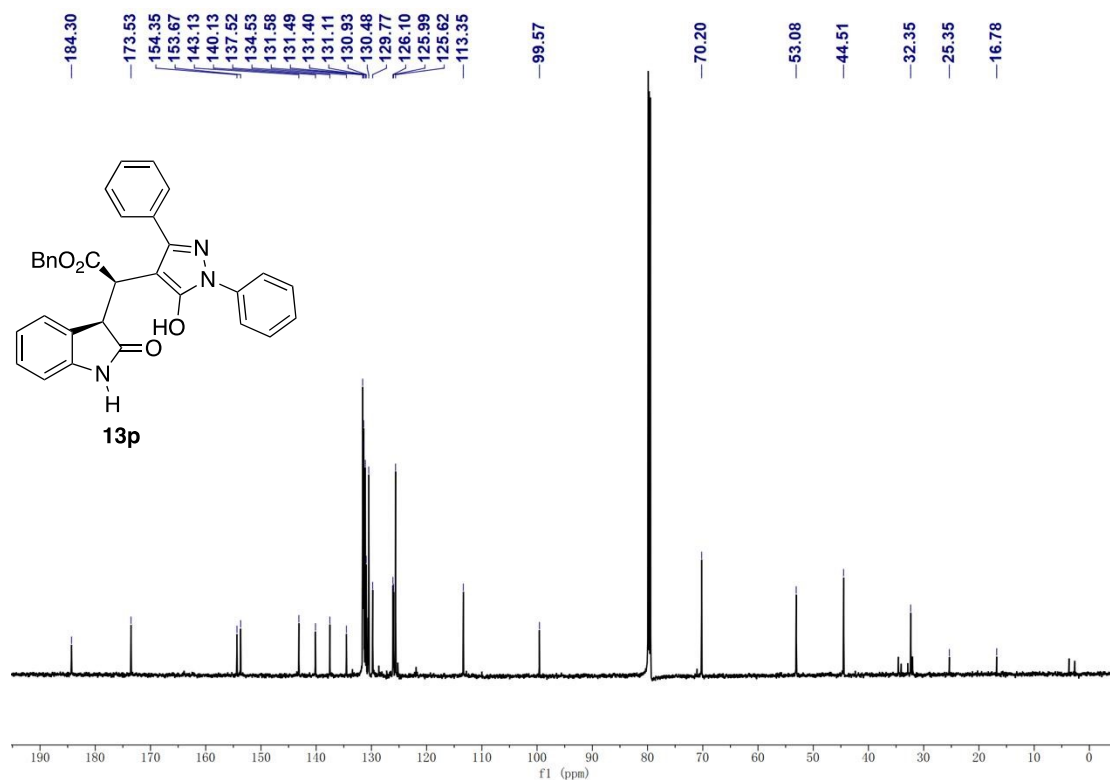

## 2 Copies of HRMS Spectra

### (R)-(3,3,3',3',5,5'-hexamethyl-2,2',3,3'-tetrahydro-1,1'-spirobi[indene]-7,7'-diyl)dimethanol [(R)-5]

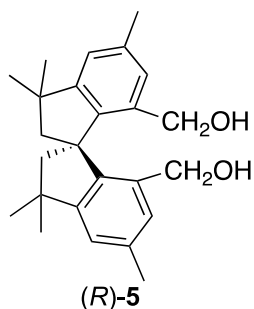

#### Spectra

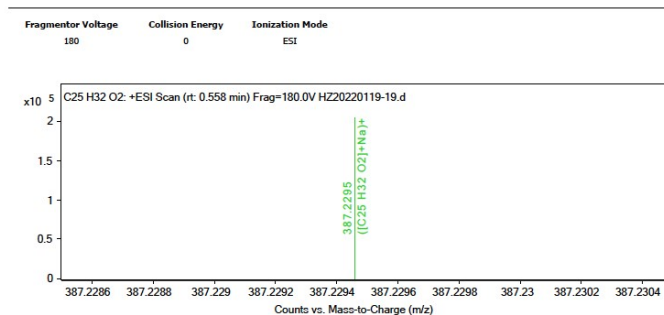

#### Formula Calculator Element Limits

| Element | Min | Max |
|---------|-----|-----|
| C       | 0   | 100 |
| H       | 0   | 200 |
| O       | 0   | 10  |

#### Formula Calculator Results

| Formula       | Best | Measured Mass | Tgt Mass | Diff (ppm) | Score |
|---------------|------|---------------|----------|------------|-------|
| C25 H32 Na O2 | True | 387.2295      | 387.2295 | 0.03       | 100   |

--- End Of Report ---

### (R)-7,7'-bis(bromomethyl)-3,3,3',3',5-pentamethyl-2,2',3,3'-tetrahydro-1,1'-spirobi[indene] [(R)-6]

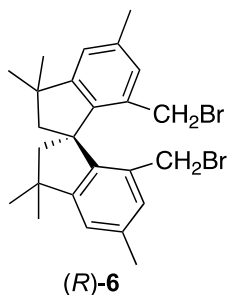

#### Elemental Composition Report

Page 1

Tolerance = 5.0 mDa / DBE: min = -1.5, max = 50.0  
Element prediction: Off

Monoisotopic Mass, Odd and Even Electron Ions  
18 formula(e) evaluated with 1 results within limits (up to 70 closest results for each mass)  
Elements Used:  
C: 0-100 H: 0-200 Br: 0-2

HZ0120-20 1126 (6.083)  
TOF MS EI+

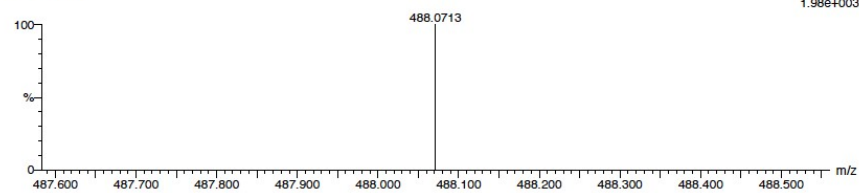

|          |            |      |      |      |           |             |
|----------|------------|------|------|------|-----------|-------------|
| Minimum: |            |      |      |      |           |             |
| Maximum: | 5.0        | 10.0 |      | -1.5 |           | 50.0        |
| Mass     | Calc. Mass | mDa  | PPM  | DBE  | i-FIT     | Formula     |
| 488.0713 | 488.0714   | -0.1 | -0.2 | 10.0 | 5547013.5 | C25 H30 Br2 |

**(1R,2R)-2-(2,4,4,7,7,9-hexamethyl-4,5,6,7-tetrahydro-11H-diindeno[7,1-cd:1',7'-ef]azocin-12(13H)-yl)cyclohexan-1-amine (7)**

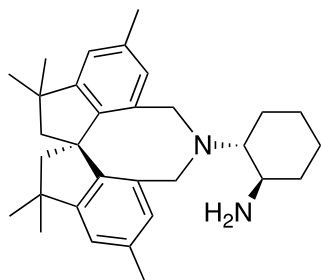

7

Spectra

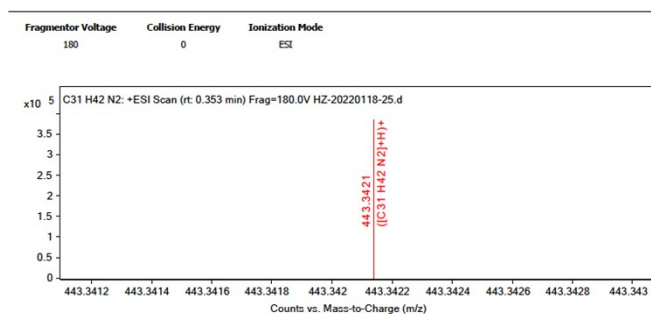

| Formula Calculator Element Limits |     |     |
|-----------------------------------|-----|-----|
| Element                           | Min | Max |
| C                                 | 0   | 50  |
| H                                 | 0   | 100 |
| O                                 | 0   | 50  |
| N                                 | 0   | 10  |

| Formula Calculator Results |      |               |          |            |       |
|----------------------------|------|---------------|----------|------------|-------|
| Formula                    | Best | Measured Mass | Tgt Mass | Diff (ppm) | Score |
| C31 H43 N2                 | True | 443.3421      | 443.3421 | 0.13       | 99.98 |

--- End Of Report ---

**3-((3,5-bis(trifluoromethyl)phenyl)amino)-4-(((1R,2R)-2-(2,4,4,7,7,9-hexamethyl-4,5,6,7-tetrahydro-11H-diindeno[7,1-cd:1',7'-ef]azocin-12(13H)-yl)cyclohexyl)amino)cyclobut-3-ene-1,2-dione (9a)**

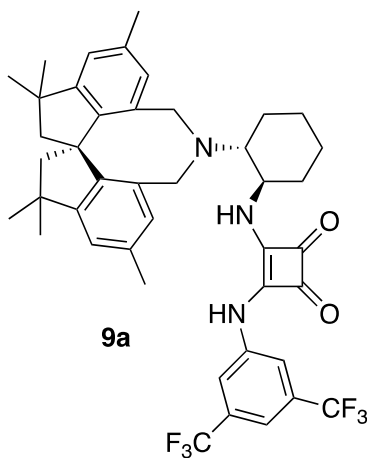

9a

Spectra

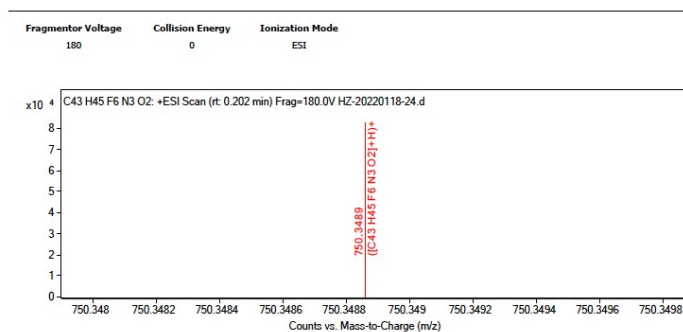

| Formula Calculator Element Limits |     |     |
|-----------------------------------|-----|-----|
| Element                           | Min | Max |
| C                                 | 0   | 50  |
| H                                 | 0   | 100 |
| O                                 | 0   | 50  |
| N                                 | 0   | 10  |
| F                                 | 0   | 6   |

| Formula Calculator Results |      |               |          |            |       |
|----------------------------|------|---------------|----------|------------|-------|
| Formula                    | Best | Measured Mass | Tgt Mass | Diff (ppm) | Score |
| C43 H46 F6 N3 O2           | True | 750.3489      | 750.3489 | 0.06       | 99.99 |

**2-oxo-3-(2,2,2-trifluoro-1-(5-hydroxy-1,3-diphenyl-1H-pyrazol-4-yl)ethyl)indoline-1-carboxylate (12a)**

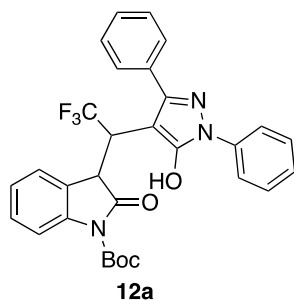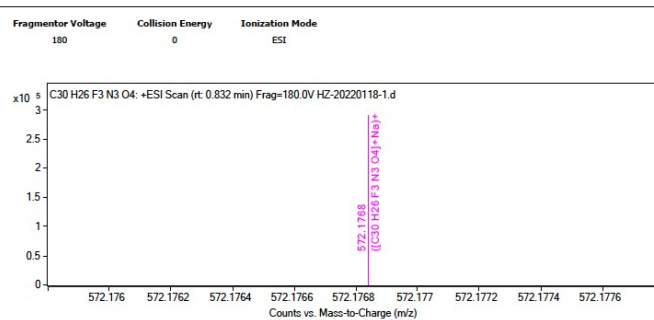

**Formula Calculator Element Limits**

| Element | Min | Max |
|---------|-----|-----|
| C       | 0   | 50  |
| H       | 0   | 100 |
| O       | 0   | 50  |
| N       | 0   | 10  |
| F       | 3   | 3   |

**Formula Calculator Results**

| Formula             | Best | Measured Mass | Tgt Mass | Diff (ppm) | Score |
|---------------------|------|---------------|----------|------------|-------|
| C30 H26 F3 N3 Na O4 | True | 572.1768      | 572.1768 | 0.02       | 100   |

-- End Of Report --

**(R)-3-((R)-2,2,2-trifluoro-1-(5-hydroxy-1,3-diphenyl-1H-pyrazol-4-yl)ethyl)indolin-2-one (13a)**

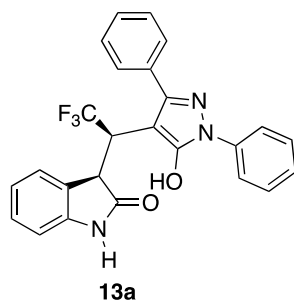

**Spectra**

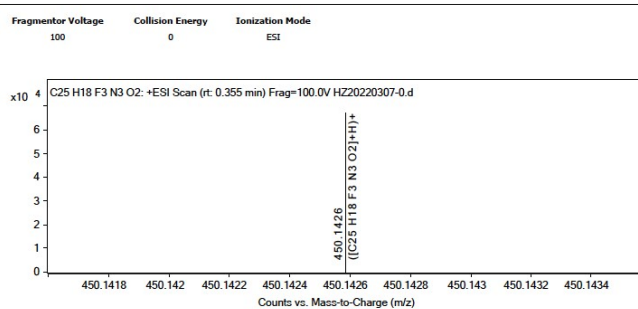

**Formula Calculator Element Limits**

| Element | Min | Max |
|---------|-----|-----|
| C       | 0   | 50  |
| H       | 0   | 100 |
| O       | 0   | 50  |
| N       | 0   | 10  |
| F       | 0   | 3   |

**Formula Calculator Results**

| Formula          | Best | Measured Mass | Tgt Mass | Diff (ppm) | Score |
|------------------|------|---------------|----------|------------|-------|
| C25 H19 F3 N3 O2 | True | 450.1426      | 450.1424 | -0.81      | 99.35 |

-- End Of Report --

**(R)-3-((R)-1-(3-(2-chlorophenyl)-5-hydroxy-1-phenyl-1H-pyrazol-4-yl)-2,2,2-trifluoroethyl)indolin-2-one (13b)**

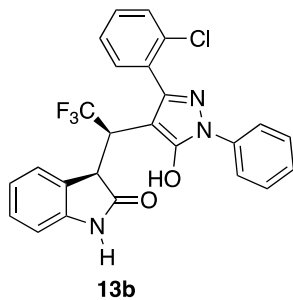

Spectra

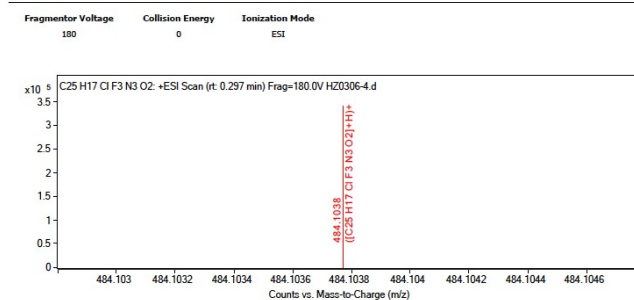

| Element | Min | Max |
|---------|-----|-----|
| C       | 0   | 50  |
| H       | 0   | 100 |
| O       | 0   | 50  |
| N       | 0   | 10  |
| F       | 0   | 3   |
| Cl      | 0   | 1   |

| Formula             | Best | Measured Mass | Tgt Mass | Diff (ppm) | Score |
|---------------------|------|---------------|----------|------------|-------|
| C25 H18 Cl F3 N3 O2 | True | 484.1038      | 484.1034 | -0.14      | 99.98 |

--- End Of Report ---

**(R)-3-((R)-1-(3-(3-chlorophenyl)-5-hydroxy-1-phenyl-1H-pyrazol-4-yl)-2,2,2-trifluoroethyl)indolin-2-one (13c)**

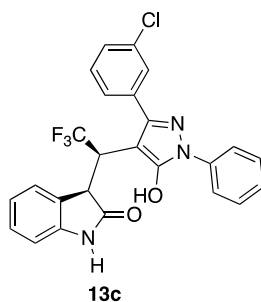

Spectra

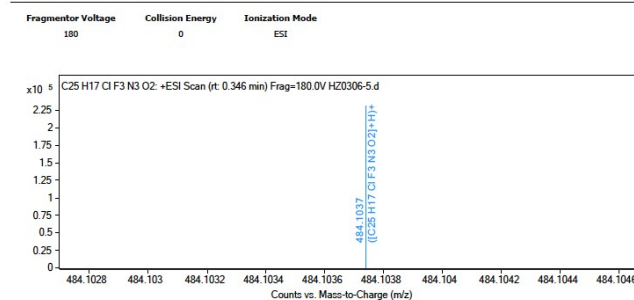

| Element | Min | Max |
|---------|-----|-----|
| C       | 0   | 50  |
| H       | 0   | 100 |
| O       | 0   | 50  |
| N       | 0   | 10  |
| F       | 0   | 3   |
| Cl      | 0   | 1   |

| Formula             | Best | Measured Mass | Tgt Mass | Diff (ppm) | Score |
|---------------------|------|---------------|----------|------------|-------|
| C25 H18 Cl F3 N3 O2 | True | 484.1037      | 484.1034 | -0.2       | 99.96 |

--- End Of Report ---

**(R)-3-((R)-1-(3-(4-chlorophenyl)-5-hydroxy-1-phenyl-1H-pyrazol-4-yl)-2,2,2-trifluoroethyl)indolin-2-one (13d)**

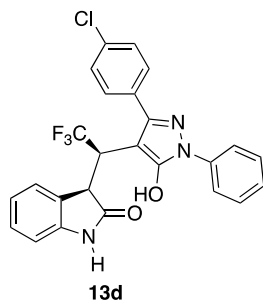

**Spectra**

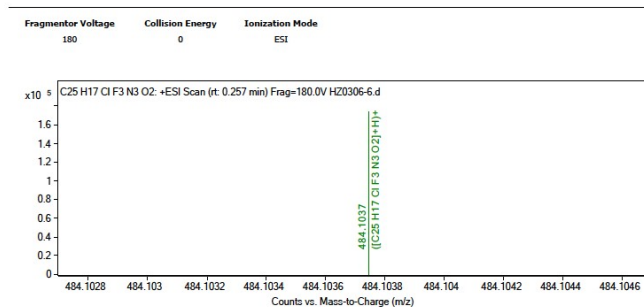

**Formula Calculator Element Limits**

| Element | Min | Max |
|---------|-----|-----|
| C       | 0   | 50  |
| H       | 0   | 100 |
| O       | 0   | 50  |
| N       | 0   | 10  |
| F       | 0   | 3   |
| Cl      | 0   | 1   |

**Formula Calculator Results**

| Formula             | Best | Measured Mass | Tgt Mass | Diff (ppm) | Score |
|---------------------|------|---------------|----------|------------|-------|
| C25 H18 Cl F3 N3 O2 | True | 484.1037      | 484.1034 | -0.57      | 99.66 |

--- End Of Report ---

**(R)-3-((R)-2,2,2-trifluoro-1-(5-hydroxy-1-phenyl-3-(p-tolyl)-1H-pyrazol-4-yl)ethyl)indolin-2-one (13e)**

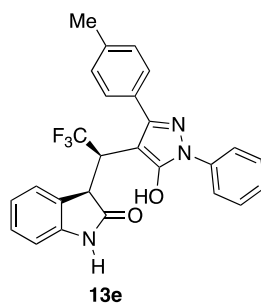

**Spectra**

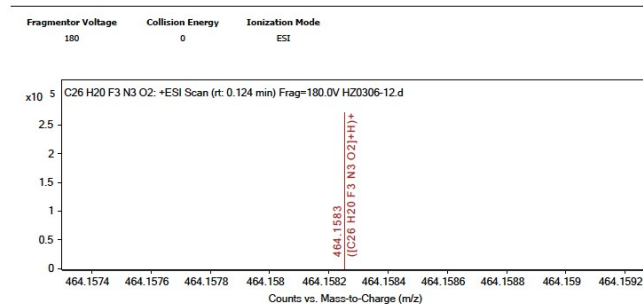

**Formula Calculator Element Limits**

| Element | Min | Max |
|---------|-----|-----|
| C       | 0   | 50  |
| H       | 0   | 100 |
| O       | 0   | 50  |
| N       | 0   | 10  |
| F       | 0   | 3   |

**Formula Calculator Results**

| Formula          | Best | Measured Mass | Tgt Mass | Diff (ppm) | Score |
|------------------|------|---------------|----------|------------|-------|
| C26 H21 F3 N3 O2 | True | 464.1583      | 464.158  | -0.11      | 99.99 |

--- End Of Report ---

**(R)-3-((R)-2,2,2-trifluoro-1-(5-hydroxy-1-phenyl-3-(*m*-tolyl)-1*H*-pyrazol-4-yl)ethyl)indolin-2-one (13f)**

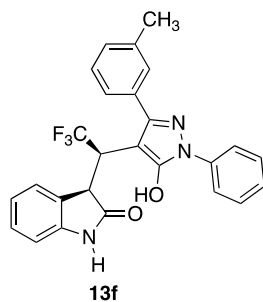

**Spectra**

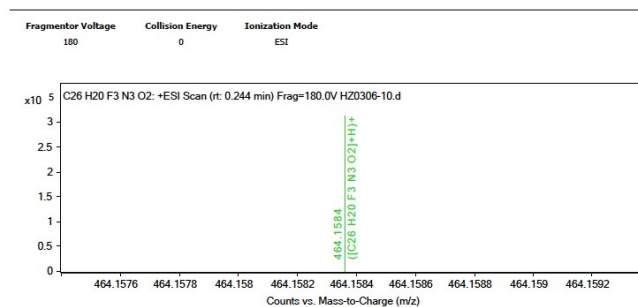

**Formula Calculator Element Limits**

| Element | Min | Max |
|---------|-----|-----|
| C       | 0   | 50  |
| H       | 0   | 100 |
| O       | 0   | 50  |
| N       | 0   | 10  |
| F       | 0   | 3   |

**Formula Calculator Results**

| Formula          | Best | Measured Mass | Tgt Mass | Diff (ppm) | Score |
|------------------|------|---------------|----------|------------|-------|
| C26 H21 F3 N3 O2 | True | 464.1584      | 464.158  | -0.51      | 99.74 |

--- End Of Report ---

**(R)-3-((R)-2,2,2-trifluoro-1-(5-hydroxy-1-(2-methoxyphenyl)-3-phenyl-1*H*-pyrazol-4-yl)ethyl)indolin-2-one (13g)**

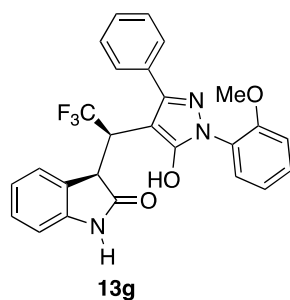

**Spectra**

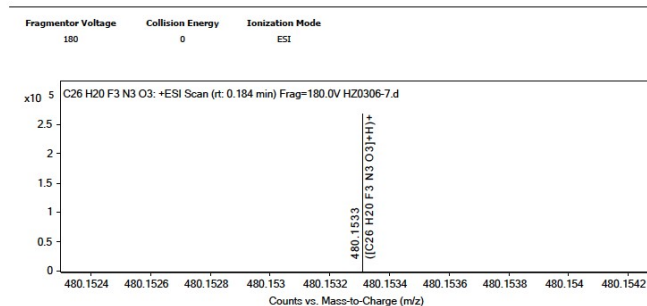

**Formula Calculator Element Limits**

| Element | Min | Max |
|---------|-----|-----|
| C       | 0   | 50  |
| H       | 0   | 100 |
| O       | 0   | 50  |
| N       | 0   | 10  |
| F       | 0   | 3   |

**Formula Calculator Results**

| Formula          | Best | Measured Mass | Tgt Mass | Diff (ppm) | Score |
|------------------|------|---------------|----------|------------|-------|
| C26 H21 F3 N3 O3 | True | 480.1533      | 480.153  | -0.46      | 99.77 |

--- End Of Report ---



**(R)-3-((R)-2,2,2-trifluoro-1-(5-hydroxy-1-(4-methoxyphenyl)-3-phenyl-1H-pyrazol-4-yl)ethyl)indolin-2-one (13h)**

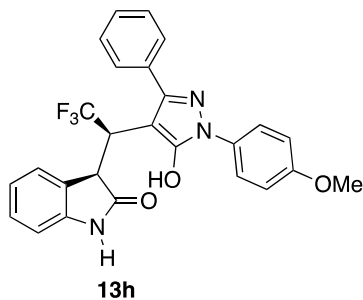

Spectra

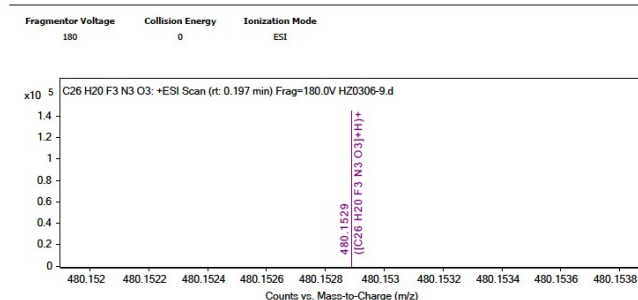

Formula Calculator Element Limits

| Element | Min | Max |
|---------|-----|-----|
| C       | 0   | 50  |
| H       | 0   | 100 |
| O       | 0   | 50  |
| N       | 0   | 10  |
| F       | 0   | 3   |

Formula Calculator Results

| Formula          | Best | Measured Mass | Tgt Mass | Diff (ppm) | Score |
|------------------|------|---------------|----------|------------|-------|
| C26 H21 F3 N3 O3 | True | 480.1529      | 480.153  | 0.19       | 99.96 |

-- End Of Report --

**(R)-3-((R)-1-(1-(4-chlorophenyl)-5-hydroxy-3-phenyl-1H-pyrazol-4-yl)-2,2,2-trifluoroethyl)indolin-2-one (13i)**

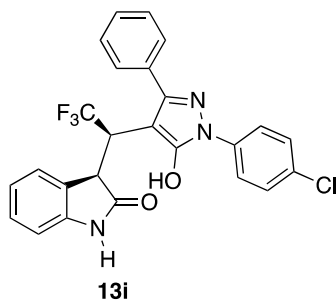

| Fragmentor Voltage | Collision Energy | Ionization Mode |
|--------------------|------------------|-----------------|
| 180                | 0                | ESI             |

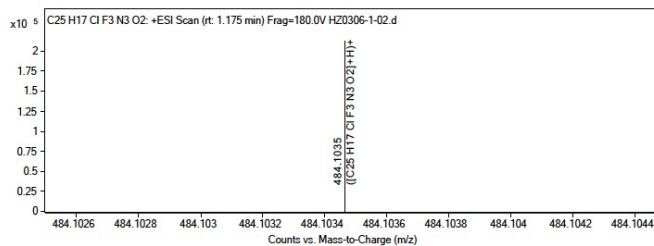

Formula Calculator Element Limits

| Element | Min | Max |
|---------|-----|-----|
| C       | 0   | 50  |
| H       | 0   | 100 |
| O       | 0   | 50  |
| N       | 0   | 10  |
| F       | 0   | 3   |
| Cl      | 0   | 1   |

Formula Calculator Results

| Formula             | Best | Measured Mass | Tgt Mass | Diff (ppm) | Score |
|---------------------|------|---------------|----------|------------|-------|
| C25 H18 Cl F3 N3 O2 | True | 484.1035      | 484.1034 | 0.42       | 99.81 |

-- End Of Report --

**(R)-3-((R)-1-(1-(3-chlorophenyl)-5-hydroxy-3-phenyl-1H-pyrazol-4-yl)-2,2,2-trifluoroethyl)indolin-2-one (13j)**

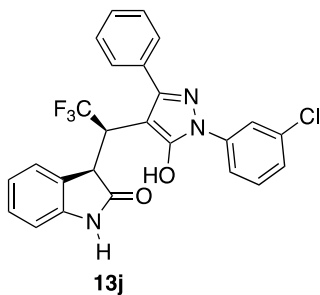

Spectra

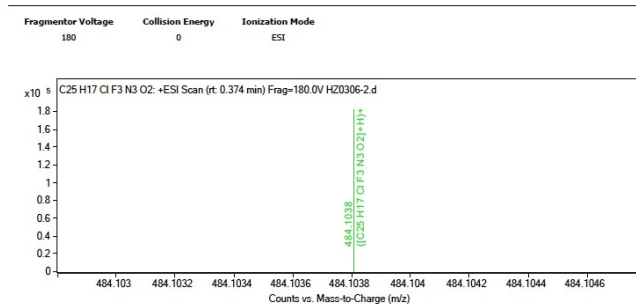

| Formula Calculator Element Limits |     |     |
|-----------------------------------|-----|-----|
| Element                           | Min | Max |
| C                                 | 0   | 50  |
| H                                 | 0   | 100 |
| O                                 | 0   | 50  |
| N                                 | 0   | 10  |
| F                                 | 0   | 3   |
| Cl                                | 0   | 1   |

Formula Calculator Results

| Formula             | Best | Measured Mass | Tgt Mass | Diff (ppm) | Score |
|---------------------|------|---------------|----------|------------|-------|
| C25 H18 Cl F3 N3 O2 | True | 484.1038      | 484.1034 | -0.55      | 99.68 |

--- End Of Report ---

**(R)-3-((R)-1-(1-(2-chlorophenyl)-5-hydroxy-3-phenyl-1H-pyrazol-4-yl)-2,2,2-trifluoroethyl)indolin-2-one (13k)**

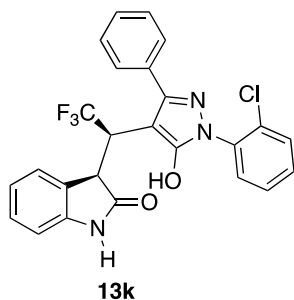

Spectra

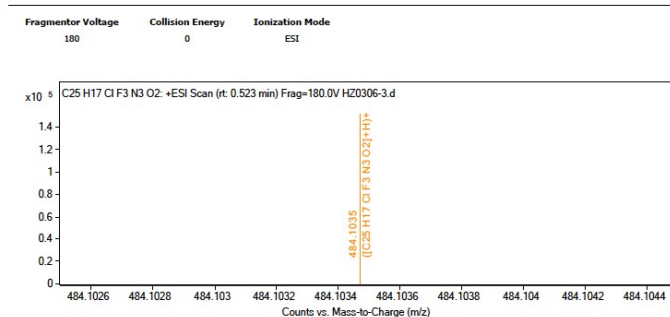

| Formula Calculator Element Limits |     |     |
|-----------------------------------|-----|-----|
| Element                           | Min | Max |
| C                                 | 0   | 50  |
| H                                 | 0   | 100 |
| O                                 | 0   | 50  |
| N                                 | 0   | 10  |
| F                                 | 0   | 3   |
| Cl                                | 0   | 1   |

Formula Calculator Results

| Formula             | Best | Measured Mass | Tgt Mass | Diff (ppm) | Score |
|---------------------|------|---------------|----------|------------|-------|
| C25 H18 Cl F3 N3 O2 | True | 484.1035      | 484.1034 | 0.05       | 100   |

**(R)-4-bromo-3-((R)-2,2,2-trifluoro-1-(5-hydroxy-1,3-diphenyl-1H-pyrazol-4-yl)ethyl)indolin-2-one (13l)**

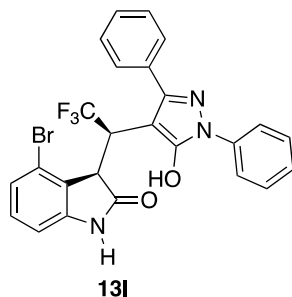

**Spectra**

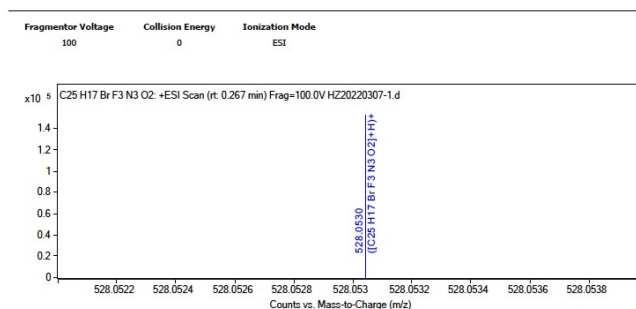

**Formula Calculator Element Limits**

| Element | Min | Max |
|---------|-----|-----|
| C       | 0   | 50  |
| H       | 0   | 100 |
| O       | 0   | 50  |
| N       | 0   | 10  |
| F       | 3   | 3   |
| Br      | 1   | 1   |

**Formula Calculator Results**

| Formula             | Best | Measured Mass | Tag Mass | Diff (ppm) | Score |
|---------------------|------|---------------|----------|------------|-------|
| C25 H17 Br F3 N3 O2 | True | 528.053       | 528.0529 | -0.11      | 99.99 |

--- End Of Report ---

**(R)-6-bromo-3-((R)-2,2,2-trifluoro-1-(5-hydroxy-1,3-diphenyl-1H-pyrazol-4-yl)ethyl)indolin-2-one (13m)**

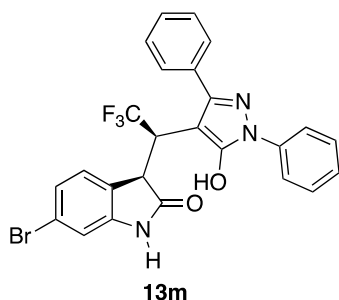

**Spectra**

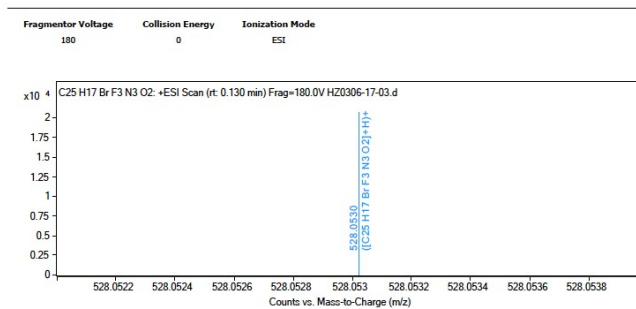

**Formula Calculator Element Limits**

| Element | Min | Max |
|---------|-----|-----|
| C       | 0   | 50  |
| H       | 0   | 100 |
| O       | 0   | 50  |
| N       | 0   | 10  |
| F       | 0   | 3   |
| Br      | 0   | 1   |

**Formula Calculator Results**

| Formula             | Best | Measured Mass | Tag Mass | Diff (ppm) | Score |
|---------------------|------|---------------|----------|------------|-------|
| C25 H17 Br F3 N3 O2 | True | 528.053       | 528.0529 | 0.56       | 99.65 |

--- End Of Report ---

**(R)-4-methyl-3-((R)-2,2,2-trifluoro-1-(5-hydroxy-1,3-diphenyl-1H-pyrazol-4-yl)ethyl)indolin-2-one (13n)**

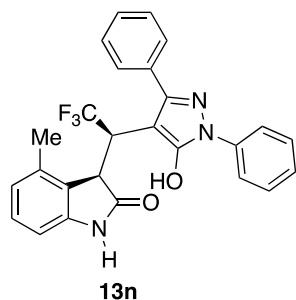

Spectra

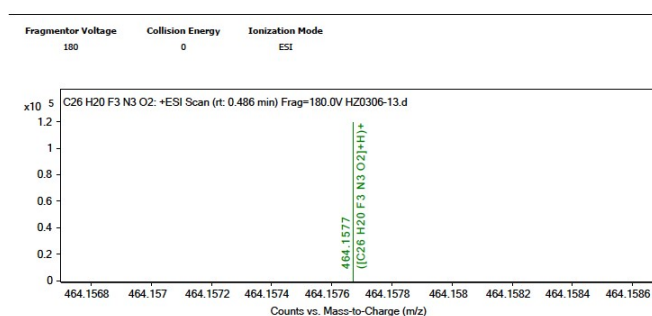

Formula Calculator Element Limits

| Element | Min | Max |
|---------|-----|-----|
| C       | 0   | 50  |
| H       | 0   | 100 |
| O       | 0   | 50  |
| N       | 0   | 10  |
| F       | 0   | 3   |

Formula Calculator Results

| Formula          | Best | Measured Mass | Tgt Mass | Diff (ppm) | Score |
|------------------|------|---------------|----------|------------|-------|
| C26 H21 F3 N3 O2 | True | 464.1577      | 464.158  | 0.87       | 99.23 |

--- End Of Report ---

**Methyl (R)-2-(5-hydroxy-1,3-diphenyl-1H-pyrazol-4-yl)-2-((R)-2-oxindolin-3-yl)acetate (13o)**

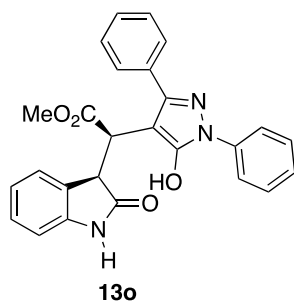

Spectra

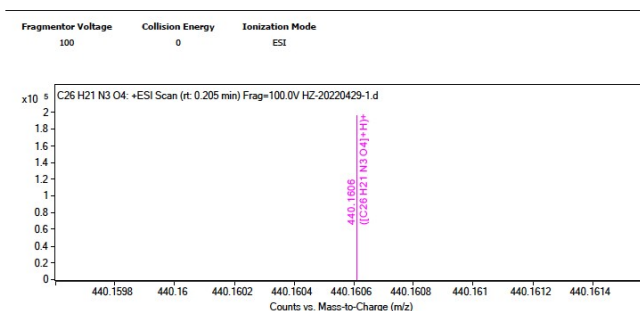

Formula Calculator Element Limits

| Element | Min | Max |
|---------|-----|-----|
| C       | 0   | 100 |
| H       | 0   | 150 |
| O       | 0   | 10  |
| N       | 0   | 5   |

Formula Calculator Results

| Formula       | Best | Measured Mass | Tgt Mass | Diff (ppm) | Score |
|---------------|------|---------------|----------|------------|-------|
| C26 H22 N3 O4 | True | 440.1606      | 440.1605 | -0.3       | 99.91 |

--- End Of Report ---

**Benzyl (*R*)-2-(5-hydroxy-1,3-diphenyl-1*H*-pyrazol-4-yl)-2-((*R*)-2-oxoindolin-3-yl)acetate (13p)**

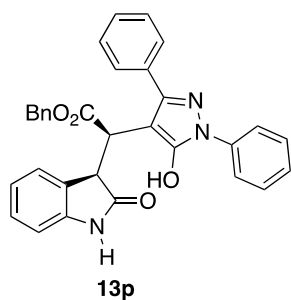

**Spectra**

Fragmentor Voltage: 180  
Collision Energy: 0  
Ionization Mode: ESI

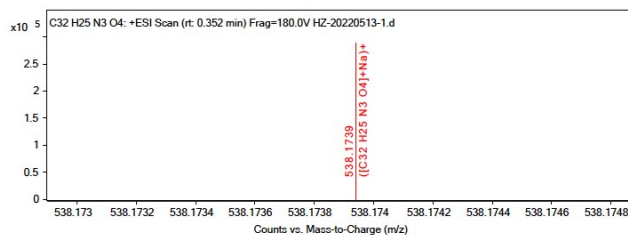

**Formula Calculator Element Limits**

| Element | Min | Max |
|---------|-----|-----|
| C       | 0   | 100 |
| H       | 0   | 150 |
| O       | 0   | 10  |
| N       | 0   | 5   |

**Formula Calculator Results**

| Formula          | Best | Measured Mass | Igt Mass | Diff (ppm) | Score |
|------------------|------|---------------|----------|------------|-------|
| C32 H25 N3 Na O4 | True | 538.1739      | 538.1737 | -0.24      | 99.94 |

--- End Of Report ---

### 3 Copies of HPLC spectra

**(R)-3-((R)-2,2,2-trifluoro-1-(5-hydroxy-1,3-diphenyl-1H-pyrazol-4-yl)ethyl)indolin-2-one (13a)**

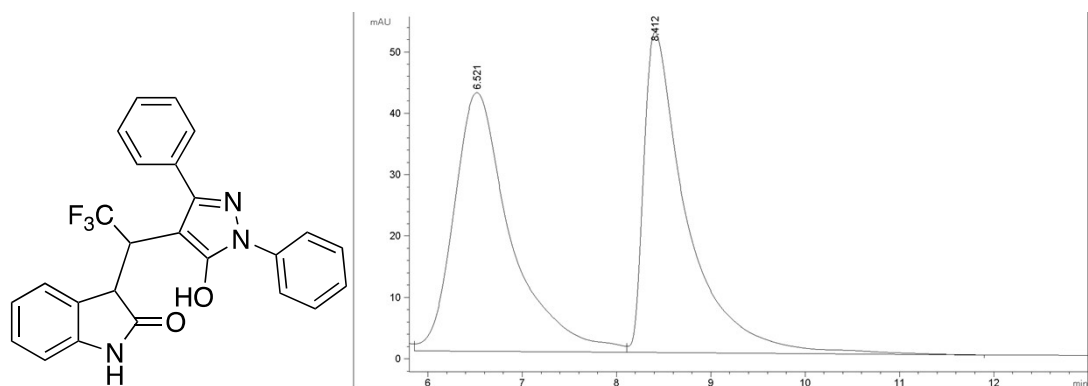

| # | [min] |    | [min]  | mAU        | *s       | [mAU]   | % |
|---|-------|----|--------|------------|----------|---------|---|
| 1 | 6.521 | VV | 0.6124 | 1769.34705 | 42.12235 | 51.5210 |   |
| 2 | 8.412 | VB | 0.4539 | 1664.87561 | 52.16689 | 48.4790 |   |

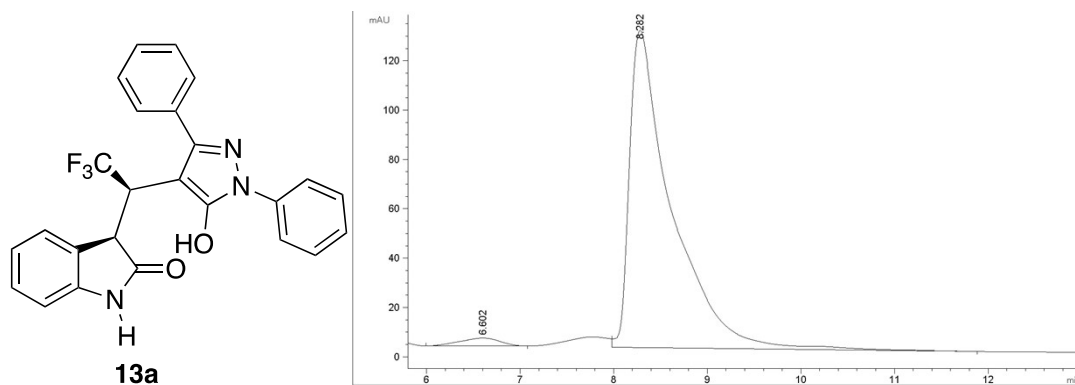

| # | [min] |    | [min]  | mAU        | *s        | [mAU]   | % |
|---|-------|----|--------|------------|-----------|---------|---|
| 1 | 6.602 | BB | 0.4521 | 95.53866   | 3.20929   | 2.3195  |   |
| 2 | 8.282 | VB | 0.4350 | 4023.36890 | 128.54436 | 97.6805 |   |

(*R*)-3-((*R*)-1-(3-(2-chlorophenyl)-5-hydroxy-1-phenyl-1*H*-pyrazol-4-yl)-2,2,2-trifluoroethyl)indolin-2-one (**13b**)

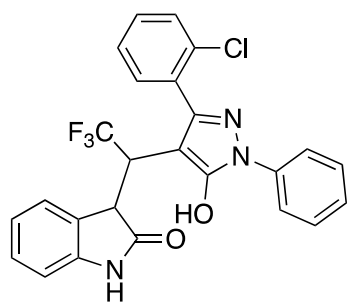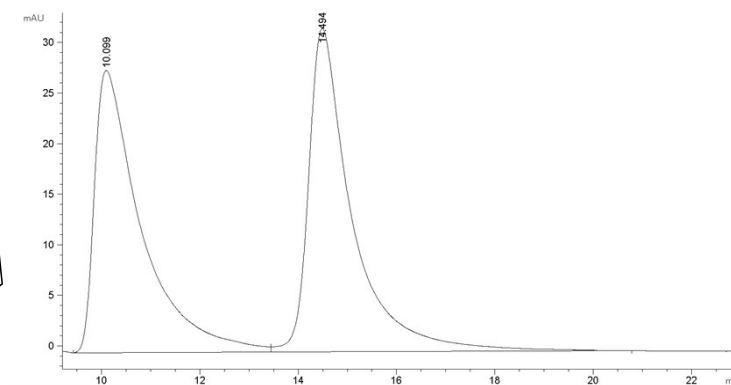

| # | [min]  |    | [min]  | mAU        | *s | [mAU ]   | %       |
|---|--------|----|--------|------------|----|----------|---------|
| 1 | 10.099 | BV | 0.9570 | 1842.83875 |    | 27.89900 | 48.3119 |
| 2 | 14.494 | VB | 0.8650 | 1971.62390 |    | 31.97630 | 51.6881 |

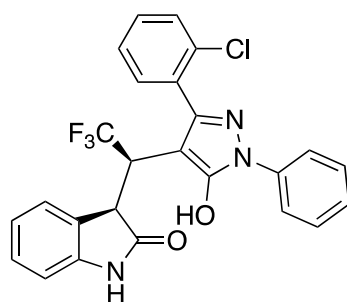

**13b**

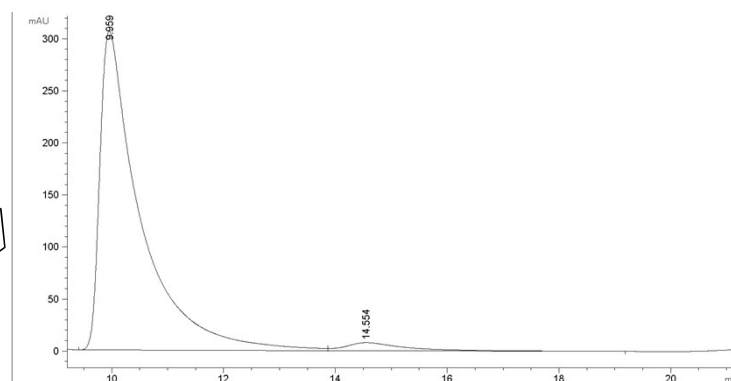

| # | [min]  |    | [min]  | mAU       | *s | [mAU ]    | %       |
|---|--------|----|--------|-----------|----|-----------|---------|
| 1 | 9.959  | BV | 0.6946 | 1.54457e4 |    | 306.31384 | 96.3269 |
| 2 | 14.554 | VB | 1.0500 | 588.97430 |    | 7.79876   | 3.6731  |

**(R)-3-((R)-1-(3-(3-chlorophenyl)-5-hydroxy-1-phenyl-1H-pyrazol-4-yl)-2,2,2-trifluoroethyl)indolin-2-one (13c)**

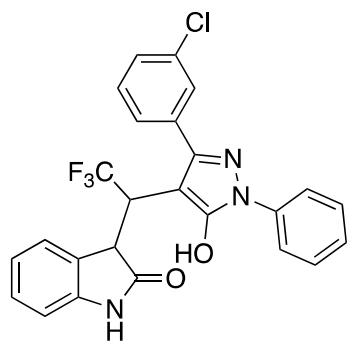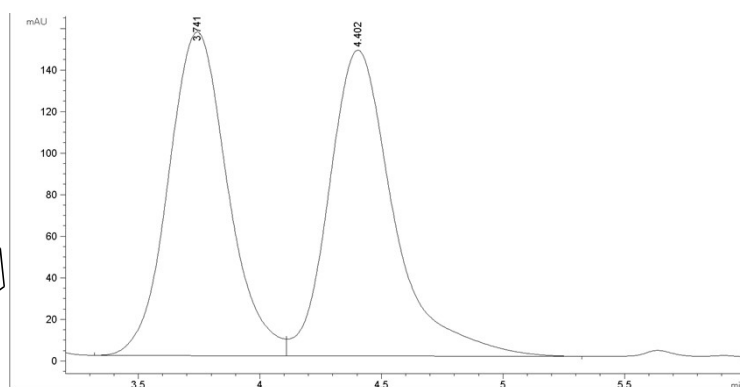

| # | [min] |    | [min]  | mAU        | *s        | [mAU ]  | % |
|---|-------|----|--------|------------|-----------|---------|---|
| 1 | 3.741 | BV | 0.2633 | 2639.13940 | 155.66644 | 49.2635 |   |
| 2 | 4.402 | VB | 0.2810 | 2718.05298 | 147.13158 | 50.7365 |   |

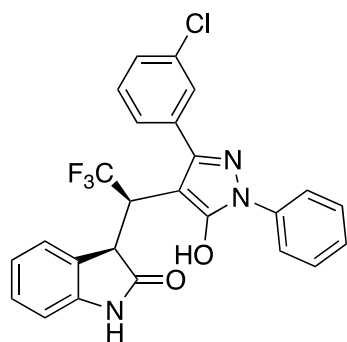

**13c**

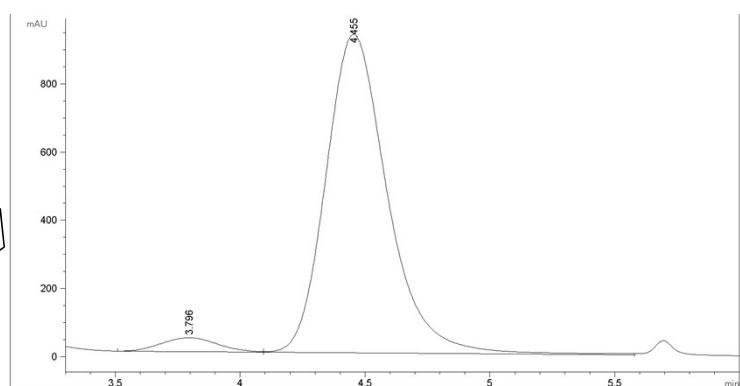

| # | [min] |    | [min]  | mAU       | *s        | [mAU ]  | % |
|---|-------|----|--------|-----------|-----------|---------|---|
| 1 | 3.796 | BV | 0.2479 | 632.25885 | 40.77148  | 3.7987  |   |
| 2 | 4.455 | VV | 0.2640 | 1.60117e4 | 934.18903 | 96.2013 |   |



**(R)-3-((R)-1-(3-(4-chlorophenyl)-5-hydroxy-1-phenyl-1H-pyrazol-4-yl)-2,2,2-trifluoroethyl)indolin-2-one (13d)**

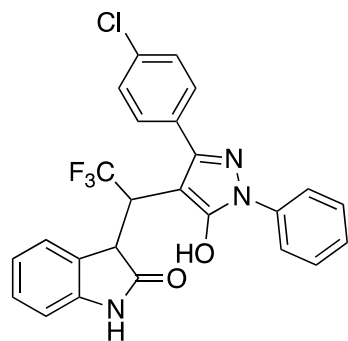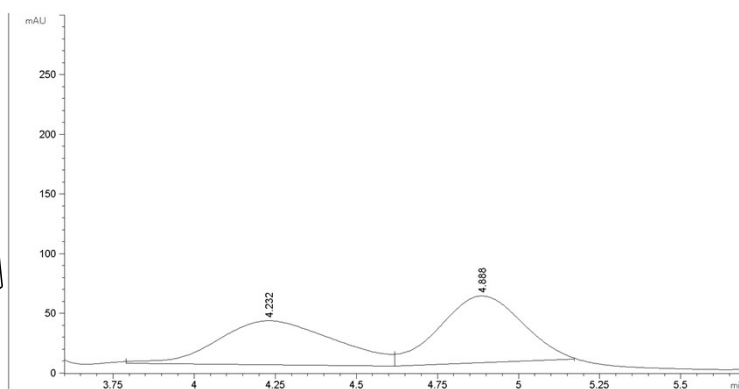

| # | [min] |    | [min]  | mAU       | *s       | [mAU ]  | % |
|---|-------|----|--------|-----------|----------|---------|---|
| 1 | 4.232 | MM | 0.4204 | 931.25403 | 36.91518 | 48.3801 |   |
| 2 | 4.888 | MM | 0.2959 | 993.61511 | 55.97254 | 51.6199 |   |

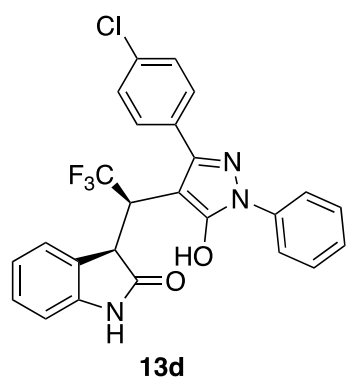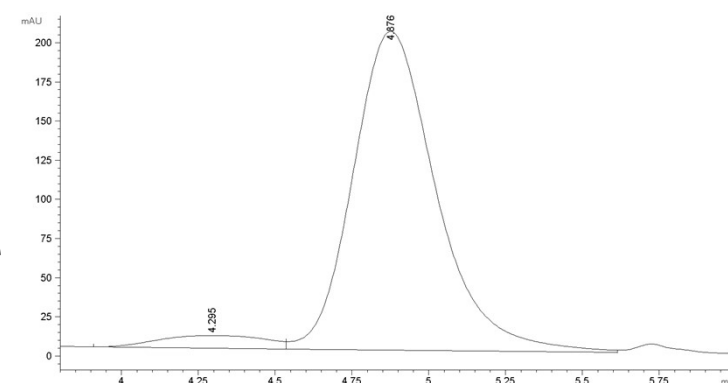

| # | [min] |    | [min]  | mAU        | *s        | [mAU ]  | % |
|---|-------|----|--------|------------|-----------|---------|---|
| 1 | 4.295 | BV | 0.3997 | 194.55821  | 7.93374   | 4.8360  |   |
| 2 | 4.876 | VV | 0.2895 | 3828.57129 | 203.42377 | 95.1640 |   |

**(R)-3-((R)-2,2,2-trifluoro-1-(5-hydroxy-1-phenyl-3-(p-tolyl)-1H-pyrazol-4-yl)ethyl)indolin-2-one (13e)**

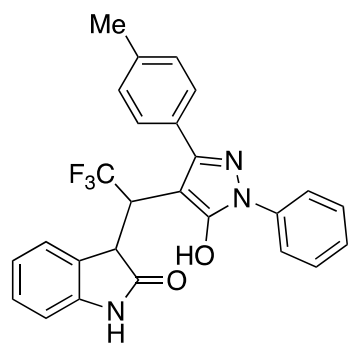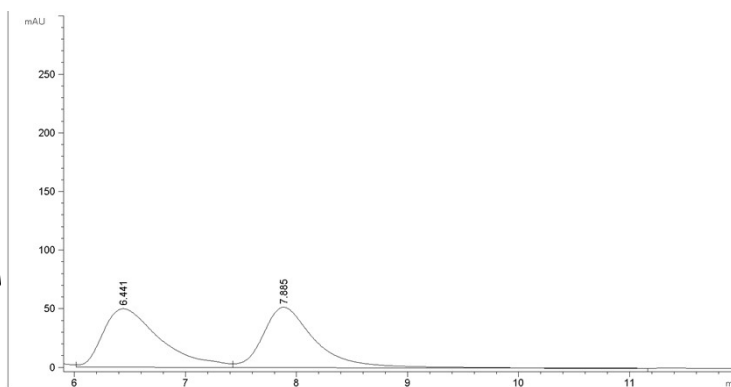

| # | [min] |    | [min]  | mAU        | *s       | [mAU ]  | % |
|---|-------|----|--------|------------|----------|---------|---|
| 1 | 6.441 | VV | 0.5422 | 1787.05835 | 49.99774 | 51.5116 |   |
| 2 | 7.885 | VB | 0.4799 | 1682.17859 | 51.52204 | 48.4884 |   |

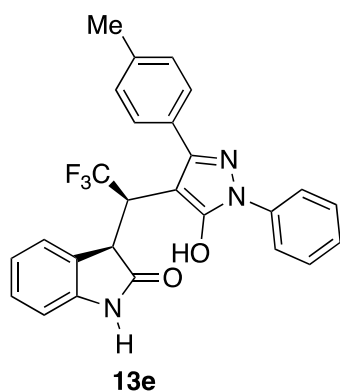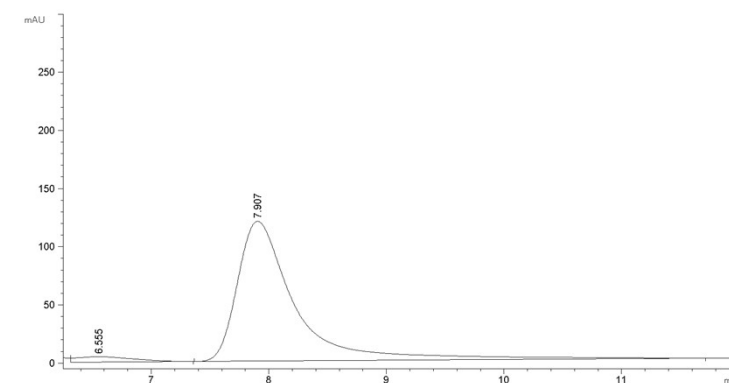

| # | [min] |    | [min]  | mAU        | *s        | [mAU ]  | % |
|---|-------|----|--------|------------|-----------|---------|---|
| 1 | 6.555 | VB | 0.4809 | 155.30009  | 4.63789   | 3.6008  |   |
| 2 | 7.907 | BB | 0.5053 | 4157.59180 | 120.23469 | 96.3992 |   |

**(R)-3-((R)-2,2,2-trifluoro-1-(5-hydroxy-1-phenyl-3-(*m*-tolyl)-1*H*-pyrazol-4-yl)ethyl)indolin-2-one (13f)**

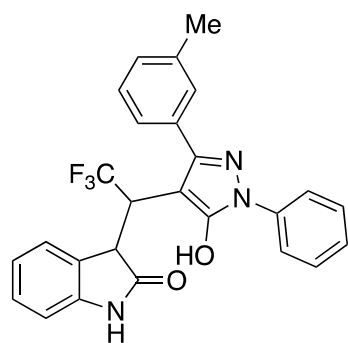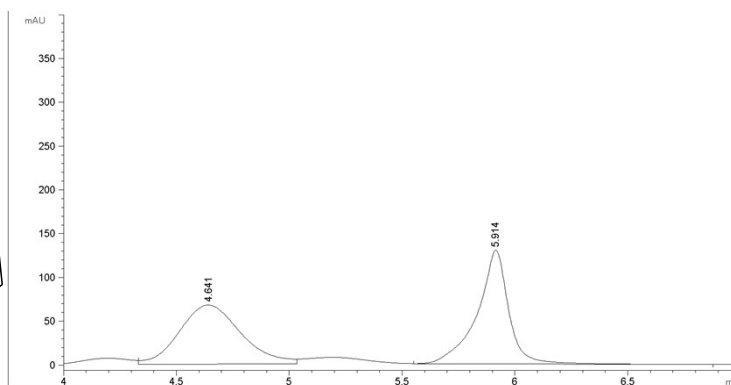

| # | [min] |    | [min]  | mAU        | *s | [mAU ]    | %       |
|---|-------|----|--------|------------|----|-----------|---------|
| 1 | 4.641 | VV | 0.2948 | 1285.96606 |    | 67.56731  | 50.6817 |
| 2 | 5.914 | BB | 0.1387 | 1251.37170 |    | 129.80740 | 49.3183 |

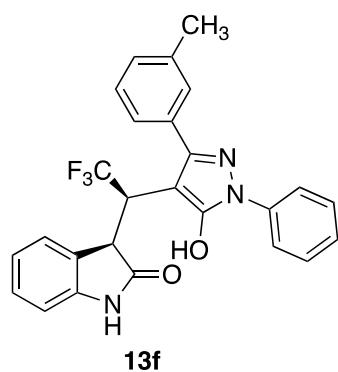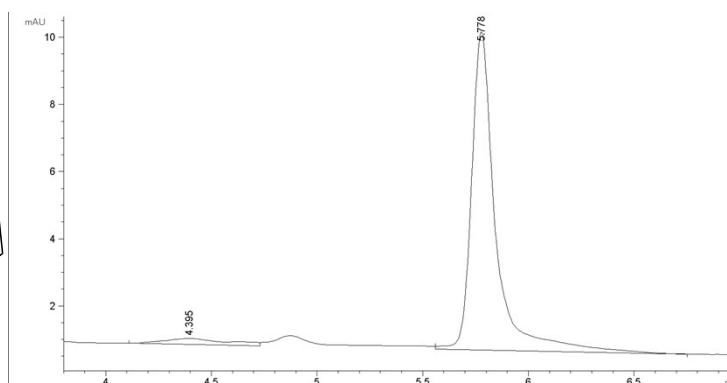

| # | [min] |    | [min]  | mAU      | *s | [mAU ]     | %       |
|---|-------|----|--------|----------|----|------------|---------|
| 1 | 4.395 | BV | 0.2749 | 3.78966  |    | 1.77762e-1 | 4.7981  |
| 2 | 5.778 | VB | 0.1173 | 75.19232 |    | 9.47867    | 95.2019 |

**(R)-3-((R)-2,2,2-trifluoro-1-(5-hydroxy-1-(2-methoxyphenyl)-3-phenyl-1H-pyrazol-4-yl)ethyl)indolin-2-one (13g)**

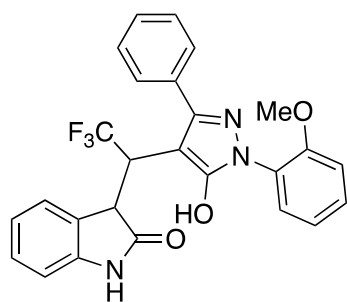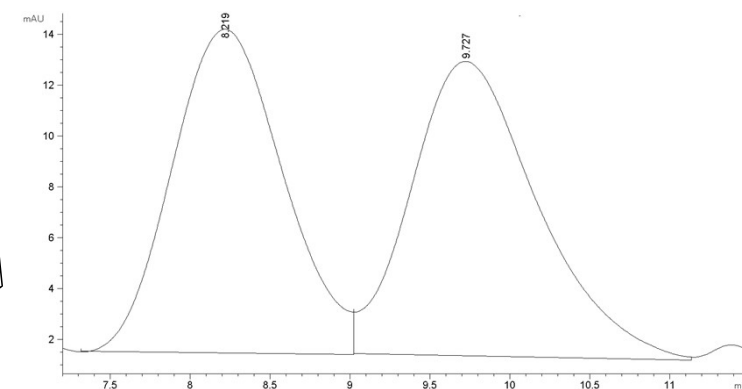

| # | [min]    | [min]  | mAU       | *s       | [mAU]   | % |
|---|----------|--------|-----------|----------|---------|---|
| 1 | 8.219 MM | 0.8033 | 614.25244 | 12.74394 | 49.0322 |   |
| 2 | 9.727 MM | 0.9188 | 638.50165 | 11.58276 | 50.9678 |   |

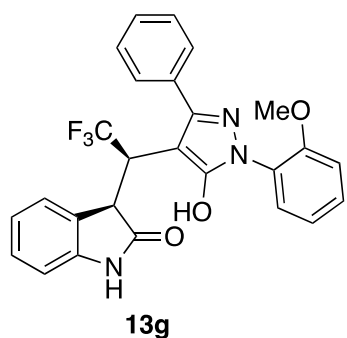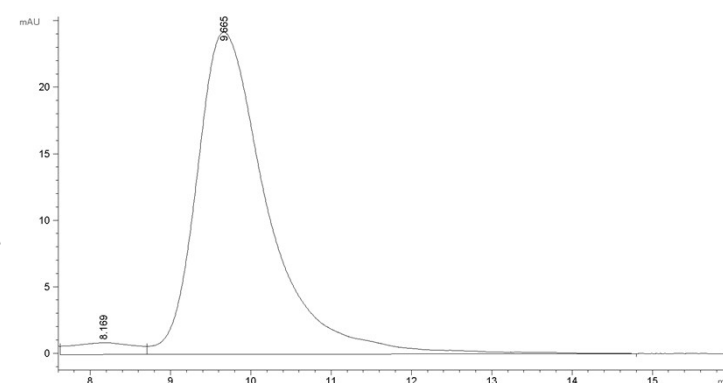

| # | [min]    | [min]  | mAU        | *s         | [mAU]   | % |
|---|----------|--------|------------|------------|---------|---|
| 1 | 8.169 VV | 0.6559 | 48.38693   | 8.76238e-1 | 3.1562  |   |
| 2 | 9.665 VB | 0.9134 | 1484.71106 | 24.21462   | 96.8438 |   |

**(R)-3-((R)-2,2,2-trifluoro-1-(5-hydroxy-1-(4-methoxyphenyl)-3-phenyl-1H-pyrazol-4-yl)ethyl)indolin-2-one (13h)**

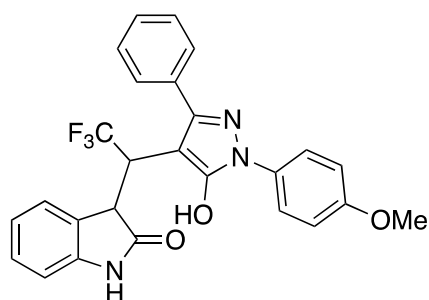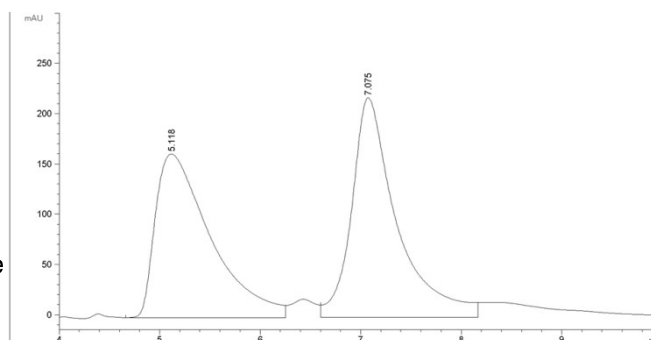

| # | [min] |    | [min]  | mAU        | *s | [mAU ]    | %       |
|---|-------|----|--------|------------|----|-----------|---------|
| 1 | 5.118 | BV | 0.5911 | 6213.99121 |    | 162.72942 | 47.7116 |
| 2 | 7.075 | VV | 0.4396 | 6810.06982 |    | 218.36449 | 52.2884 |

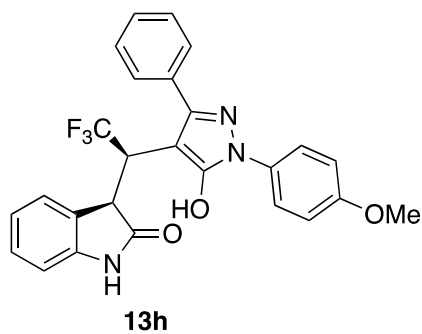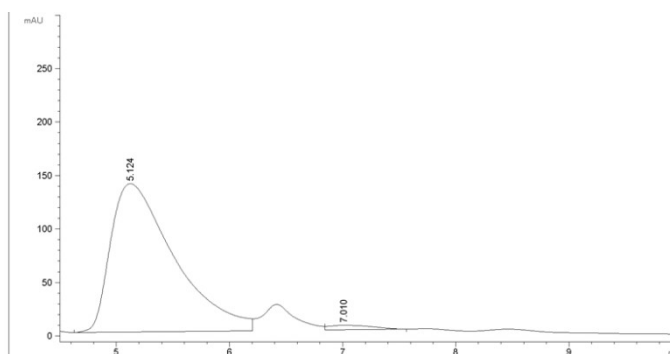

| # | [min] |    | [min]  | mAU        | *s | [mAU ]    | %       |
|---|-------|----|--------|------------|----|-----------|---------|
| 1 | 5.124 | BV | 0.5853 | 5435.19189 |    | 138.71611 | 98.0074 |
| 2 | 7.010 | VB | 0.4295 | 110.50494  |    | 4.19622   | 1.9926  |

**(R)-3-((R)-1-(1-(4-chlorophenyl)-5-hydroxy-3-phenyl-1H-pyrazol-4-yl)-2,2,2-trifluoroethyl)indolin-2-one (13i)**

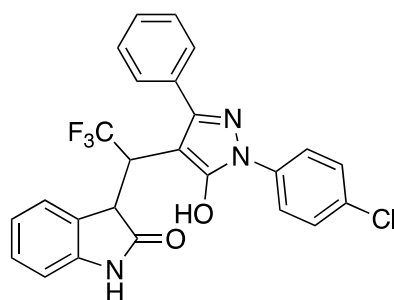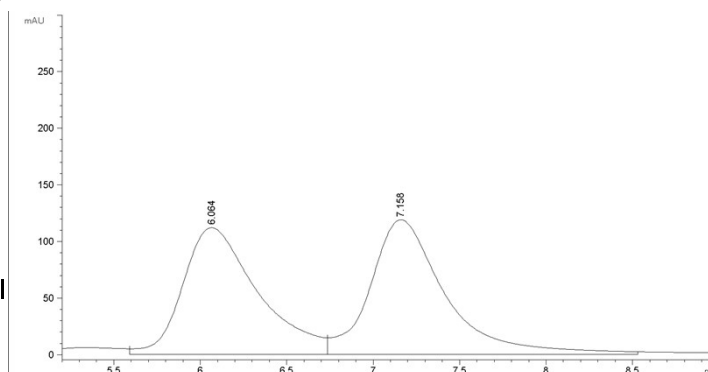

| # | [min] |    | [min]  | mAU        | *s        | [mAU]   | % |
|---|-------|----|--------|------------|-----------|---------|---|
| 1 | 6.064 | VV | 0.4471 | 3365.99268 | 111.87138 | 48.4691 |   |
| 2 | 7.158 | MF | 0.5018 | 3578.62402 | 118.85399 | 51.5309 |   |

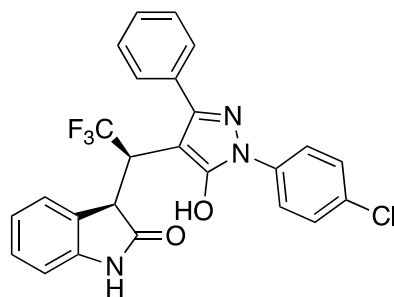

**13i**

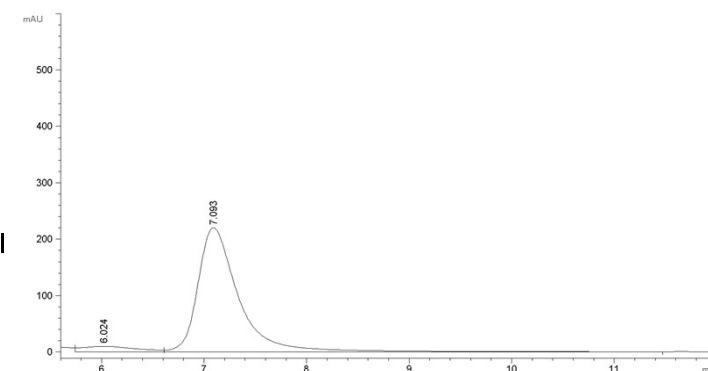

| # | [min] |    | [min]  | mAU        | *s        | [mAU]   | % |
|---|-------|----|--------|------------|-----------|---------|---|
| 1 | 6.024 | VV | 0.5247 | 364.63638  | 9.99376   | 5.6476  |   |
| 2 | 7.093 | VB | 0.4104 | 6091.85791 | 220.03296 | 94.3524 |   |

(*R*)-3-((*R*)-1-(1-(3-chlorophenyl)-5-hydroxy-3-phenyl-1*H*-pyrazol-4-yl)-2,2,2-trifluoroethyl)indolin-2-one (**13j**)

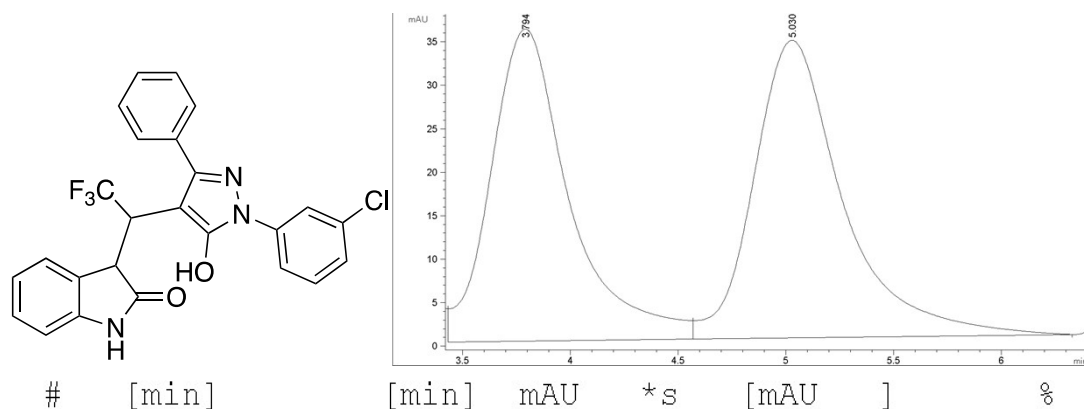

| # | [min] | [min] | mAU    | *s        | [mAU]    | %       |
|---|-------|-------|--------|-----------|----------|---------|
| 1 | 3.794 | VV    | 0.3810 | 912.50159 | 35.89902 | 48.0653 |
| 2 | 5.030 | VB    | 0.4321 | 985.96039 | 34.23189 | 51.9347 |

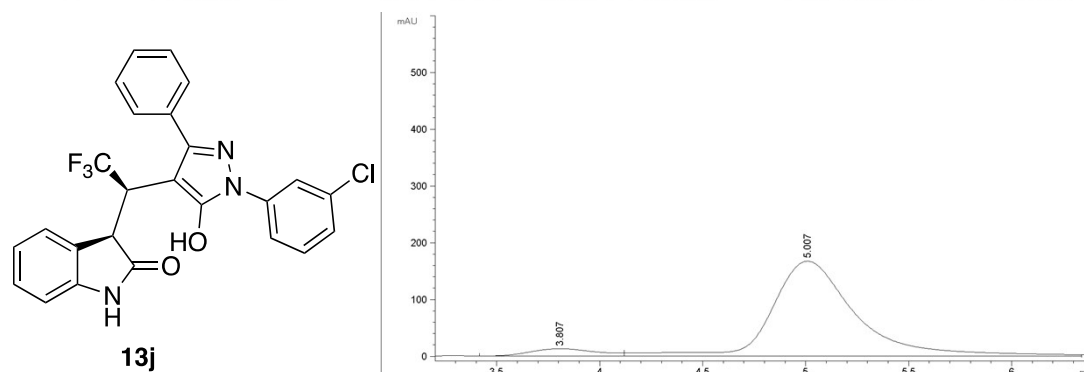

| # | [min] | [min] | mAU    | *s         | [mAU]     | %       |
|---|-------|-------|--------|------------|-----------|---------|
| 1 | 3.807 | BV    | 0.3353 | 280.82233  | 12.76337  | 5.6598  |
| 2 | 5.007 | VV    | 0.4176 | 4680.89990 | 166.84137 | 94.3402 |

**(R)-3-((R)-1-(1-(2-chlorophenyl)-5-hydroxy-3-phenyl-1H-pyrazol-4-yl)-2,2,2-trifluoroethyl)indolin-2-one (10k)**

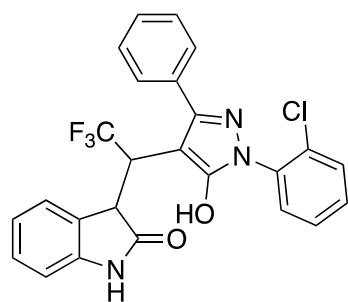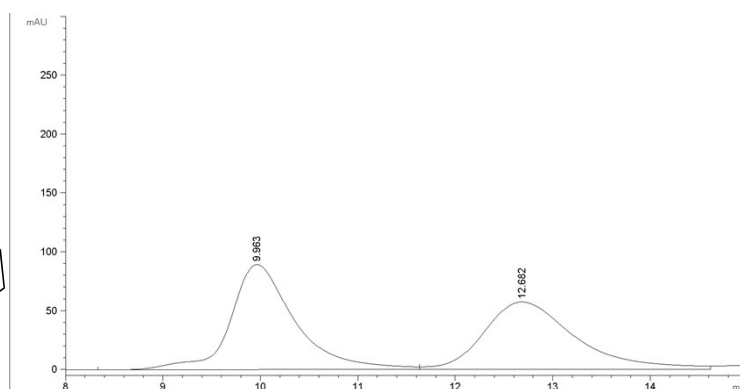

| # | [min]  |    | [min]  | mAU        | *s       | [mAU]   | % |
|---|--------|----|--------|------------|----------|---------|---|
| 1 | 9.963  | BV | 0.6788 | 4125.13037 | 89.27793 | 52.4944 |   |
| 2 | 12.682 | VV | 0.9818 | 3733.10474 | 57.26619 | 47.5056 |   |

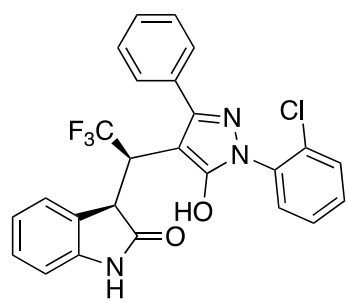

**13k**

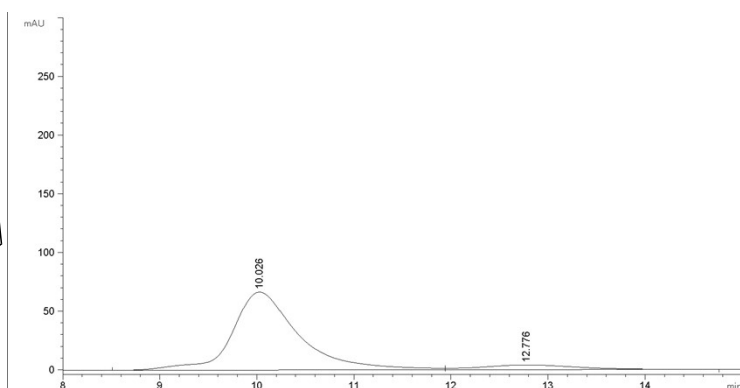

| # | [min]  |    | [min]  | mAU        | *s       | [mAU]   | % |
|---|--------|----|--------|------------|----------|---------|---|
| 1 | 10.026 | BV | 0.6996 | 3171.24829 | 66.42992 | 91.7772 |   |
| 2 | 12.776 | VB | 1.0644 | 284.12689  | 4.07219  | 8.2228  |   |



**(R)-4-bromo-3-((R)-2,2,2-trifluoro-1-(5-hydroxy-1,3-diphenyl-1H-pyrazol-4-yl)ethyl)indolin-2-one (13I)**

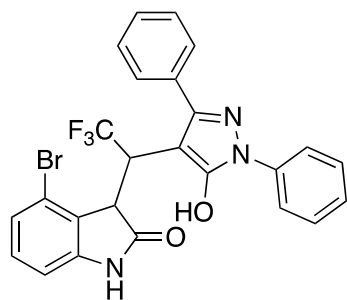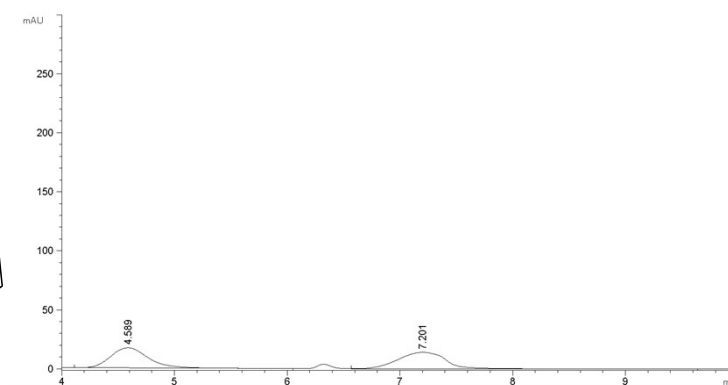

| # | [min] |    | [min]  | mAU       | *s       | [mAU ]  | % |
|---|-------|----|--------|-----------|----------|---------|---|
| 1 | 4.589 | BB | 0.3633 | 404.10199 | 17.08638 | 49.6677 |   |
| 2 | 7.201 | VB | 0.4680 | 409.50961 | 13.93612 | 50.3323 |   |

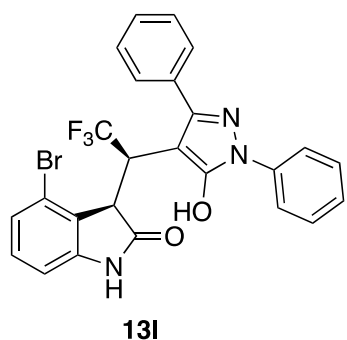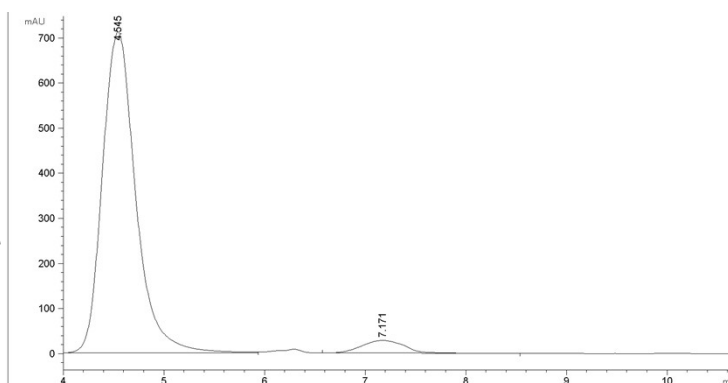

| # | [min] |    | [min]  | mAU       | *s        | [mAU ]  | % |
|---|-------|----|--------|-----------|-----------|---------|---|
| 1 | 4.545 | BV | 0.3572 | 1.63941e4 | 712.64734 | 95.1277 |   |
| 2 | 7.171 | BB | 0.4820 | 839.67566 | 28.26545  | 4.8723  |   |

**(R)-6-bromo-3-((R)-2,2,2-trifluoro-1-(5-hydroxy-1,3-diphenyl-1H-pyrazol-4-yl)ethyl)indolin-2-one (13m)**

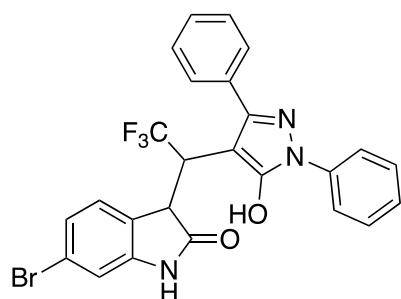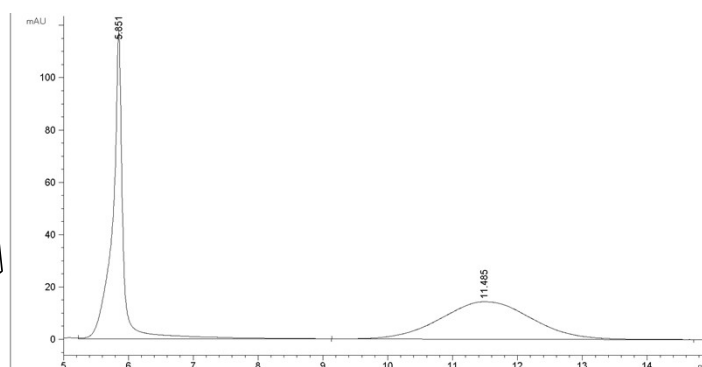

| # | [min]  | [min] | mAU    | *s         | [mAU]     | %       |
|---|--------|-------|--------|------------|-----------|---------|
| 1 | 5.851  | VB    | 0.1485 | 1322.33154 | 117.71284 | 48.6907 |
| 2 | 11.485 | BB    | 1.3716 | 1393.44824 | 14.27794  | 51.3093 |

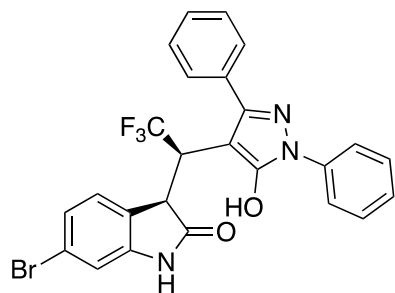

**13m**

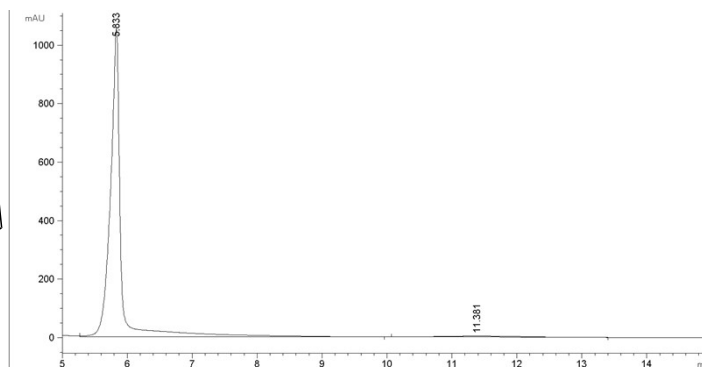

| # | [min]  | [min] | mAU    | *s        | [mAU]      | %       |
|---|--------|-------|--------|-----------|------------|---------|
| 1 | 5.833  | VB    | 0.1512 | 1.18392e4 | 1055.59583 | 97.4132 |
| 2 | 11.381 | BB    | 1.0417 | 314.39594 | 3.64340    | 2.5868  |

**(R)-4-methyl-3-((R)-2,2,2-trifluoro-1-(5-hydroxy-1,3-diphenyl-1H-pyrazol-4-yl)ethyl)indolin-2-one (13n)**

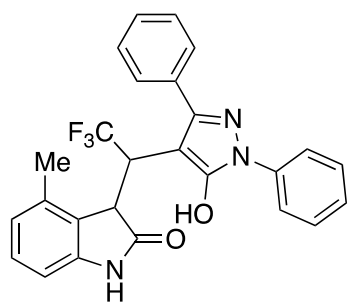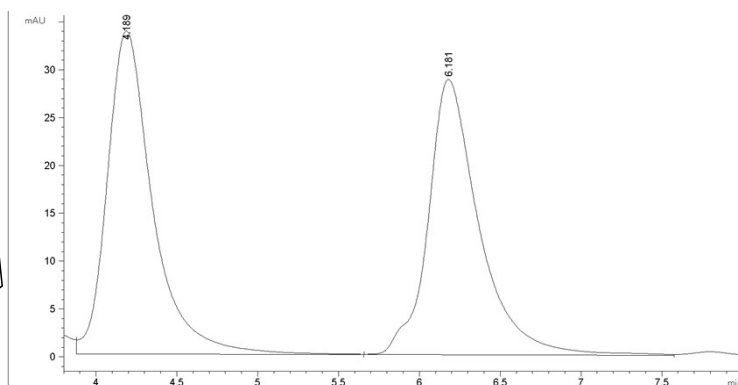

| # | [min] |    | [min]  | mAU       | *s       | [mAU]   | % |
|---|-------|----|--------|-----------|----------|---------|---|
| 1 | 4.189 | VB | 0.2913 | 656.98907 | 33.73678 | 51.0095 |   |
| 2 | 6.181 | BV | 0.3232 | 630.98529 | 28.73274 | 48.9905 |   |

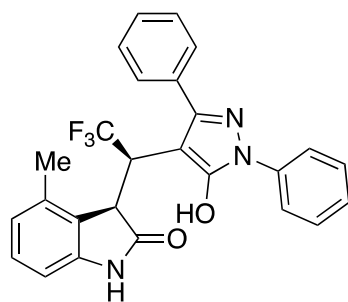

**13n**

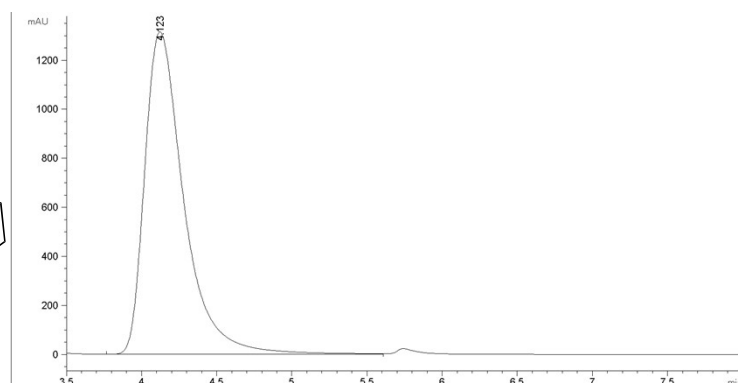

| # | [min] |    | [min]  | mAU       | *s         | [mAU]    | % |
|---|-------|----|--------|-----------|------------|----------|---|
| 1 | 4.123 | BV | 0.2760 | 2.38877e4 | 1314.96423 | 100.0000 |   |

(*R*)-4-methyl-3-((*R*)-2,2,2-trifluoro-1-(5-hydroxy-1,3-diphenyl-1*H*-pyrazol-4-yl)ethyl)indolin-2-one (**13o**)

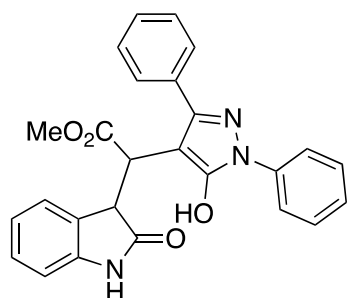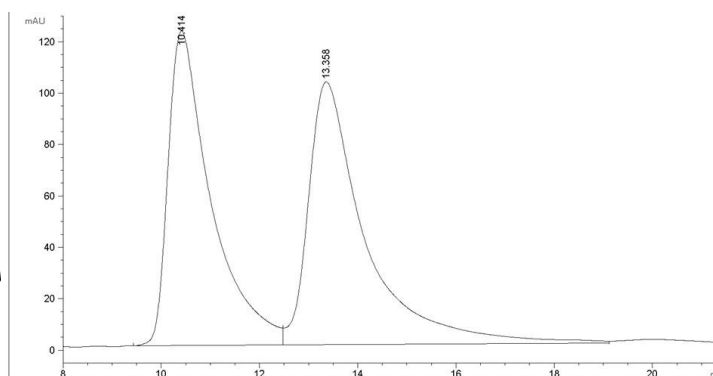

| # | [min]     | [min]  | mAU        | *s        | [mAU ]  | % |
|---|-----------|--------|------------|-----------|---------|---|
| 1 | 10.414 BV | 0.8656 | 7423.72754 | 122.27828 | 47.4450 |   |
| 2 | 13.358 VV | 1.1541 | 8223.28613 | 102.21088 | 52.5550 |   |

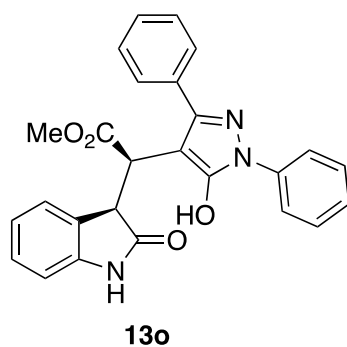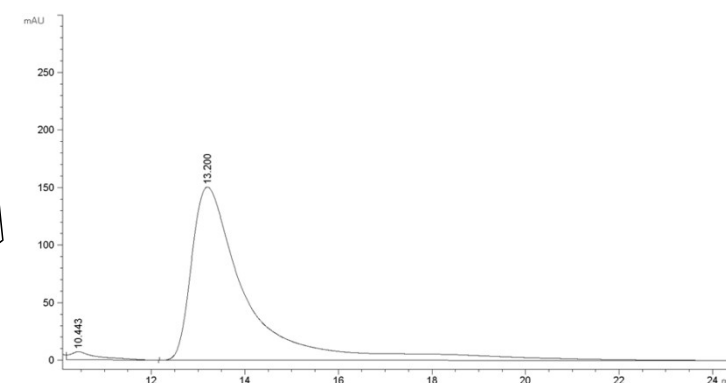

| # | [min]      | [min]  | mAU       | *s        | [mAU ]  | % |
|---|------------|--------|-----------|-----------|---------|---|
| 1 | 10.443 VB  | 0.5463 | 292.71744 | 7.12405   | 2.2981  |   |
| 2 | 13.200 BBA | 1.1825 | 1.24448e4 | 150.59853 | 97.7019 |   |

**(R)-4-methyl-3-((R)-2,2,2-trifluoro-1-(5-hydroxy-1,3-diphenyl-1H-pyrazol-4-yl)ethyl)indolin-2-one (13p)**

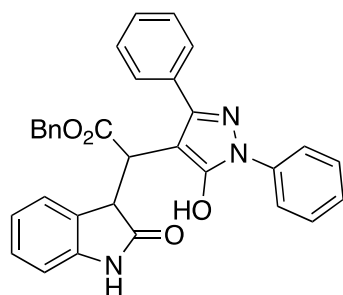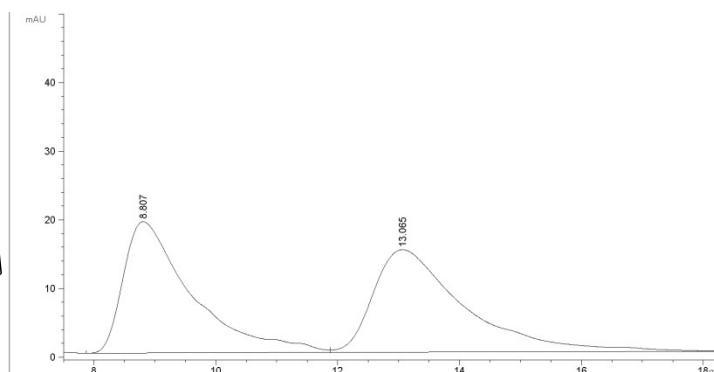

| # | [min]  |     | [min]  | mAU        | *s | [mAU ]   | %       |
|---|--------|-----|--------|------------|----|----------|---------|
| 1 | 8.807  | BV  | 1.1321 | 1488.20984 |    | 19.12426 | 49.1189 |
| 2 | 13.065 | VBA | 1.5108 | 1541.59973 |    | 14.92546 | 50.8811 |

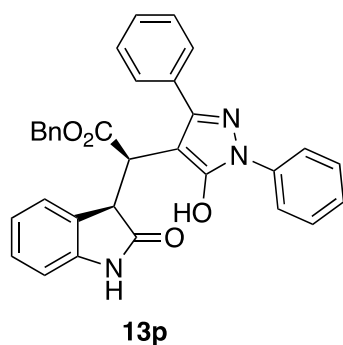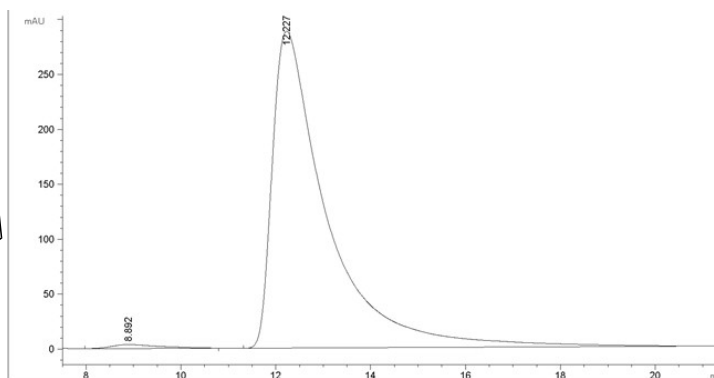

| # | [min]  |     | [min]  | mAU       | *s | [mAU ]    | %       |
|---|--------|-----|--------|-----------|----|-----------|---------|
| 1 | 8.882  | BV  | 1.0126 | 258.28604 |    | 3.55922   | 1.1024  |
| 2 | 12.227 | BBA | 1.1355 | 2.31704e4 |    | 288.34030 | 98.8976 |

## 4 X-ray data for compound 13e

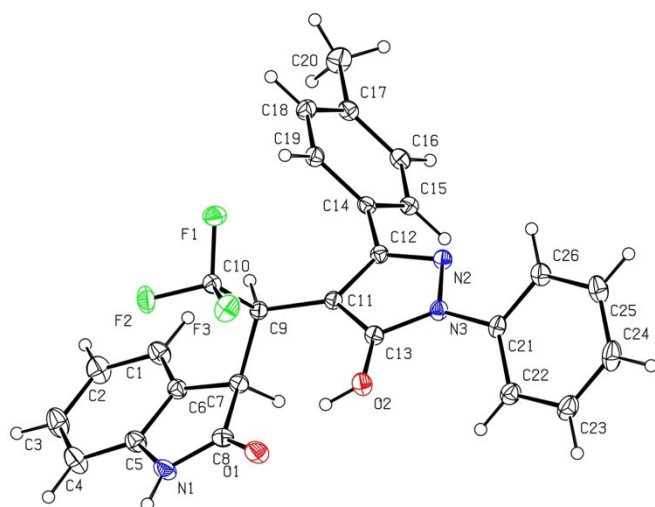

### Data block: mo\_220425\_hz\_1\_0m

Bond precision: C-C = 0.0031 Å

Wavelength=1.54178

Cell: a=11.5944(5)

b=7.9944(4)

c=11.8474(5)

alpha=90

beta=101.879(2)

gamma=90

Temperature:

170 K

|                | Calculated       | Reported         |
|----------------|------------------|------------------|
| Volume Space   | 1074.62(8)       | 1074.62(8)       |
| group Hall     | P 21             | P 1 21 1         |
| group          | P 2yb            | P 2yb            |
| Moiety formula | C26 H20 F3 N3 O2 | C26 H20 F3 N3 O2 |
| Sum formula    | C26 H20 F3 N3 O2 | C26 H20 F3 N3 O2 |
| Mr             | 463.45           | 463.45           |
| Dx,g cm-3      | 1.432            | 1.432            |
| Z              | 2                | 2                |
| Mu (mm-1)      | 0.925            | 0.925            |
| F000           | 480.0            | 480.0            |
| F000'          | 481.68           |                  |
| h,k,lmax       | 13,9,14          | 13,9,14          |
| Nref           | 3940[ 2122]      | 3929             |
| Tmin,Tmax      | 0.957,0.973      | 0.661,0.753      |
| Tmin'          | 0.744            |                  |

Correction method= # Reported T Limits: Tmin=0.661 Tmax=0.753

AbsCorr = MULTI-SCAN

Data completeness= 1.85/1.00

Theta(max)= 68.525

R(reflections)= 0.0307( 3728)

wR2(reflections)= 0.0734( 3929)

S = 1.067

Npar= 309
